# Supplementary material for: A scoring model based on bacterial lipopolysaccharide-related genes to predict prognosis in NSCLC
Source: Front Genet. 2024 Nov 14;15:1408000. doi: 10.3389/fgene.2024.1408000 (PMC11602480; doi:10.3389/fgene.2024.1408000)
Supplement: Supplementary file 6 [file Table6.xlsx]

## Sheet: additional file 6 table S6 GO
Description	GeneRatio	BgRatio	pvalue	p.adjust	qvalue	Count	geneID	Other
2-oxoglutarate metabolic process	1/225	15/17910	0.172801	0.301349	0.21703	1	GPT2	BP
3'-5' DNA helicase activity	1/213	7/16967	0.0846497	0.264037	0.212375	1	RECQL4	MF
abscission	1/225	6/17910	0.0730587	0.190736	0.137367	1	AURKB	BP
acetyl-CoA biosynthetic process	1/225	21/17910	0.233285	0.357186	0.257244	1	PDK4	BP
acetyl-CoA biosynthetic process from pyruvate	1/225	16/17910	0.183202	0.310212	0.223414	1	PDK4	BP
acetyl-CoA metabolic process	1/225	33/17910	0.341358	0.456344	0.328658	1	PDK4	BP
acetylglucosaminyltransferase activity	2/213	45/16967	0.109407	0.286361	0.23033	2	MGAT3/B3GNT3	MF
acid secretion	2/225	113/17910	0.416269	0.520688	0.374998	2	AGTR2/EDN1	BP
acrosomal membrane	1/226	22/18675	0.235103	0.396014	0.291089	1	CAV2	CC
acrosomal vesicle	1/226	103/18675	0.715648	0.839939	0.617397	1	CAV2	CC
actin binding	5/213	361/16967	0.47564	0.625187	0.50286	5	TNS1/LRRK2/FERMT1/MYH11/TNS4	MF
actin cytoskeleton	8/226	432/18675	0.154623	0.30393	0.223404	8	MYZAP/TEK/CAVIN2/CLDN5/FGR/SLC2A1/LAD1/MYH11	CC
actin cytoskeleton organization	10/225	559/17910	0.167278	0.29757	0.214309	10	TEK/ANKRD1/RGCC/S1PR1/EMP2/FGD5/CSF3/AQP1/EDN1/MYH11	BP
actin cytoskeleton reorganization	3/225	85/17910	0.0915925	0.221029	0.159184	3	TEK/S1PR1/CSF3	BP
actin filament	1/226	74/18675	0.594554	0.747284	0.54929	1	TEK	CC
actin filament binding	2/213	143/16967	0.538223	0.669443	0.538457	2	FERMT1/MYH11	MF
actin filament bundle	1/226	59/18675	0.512996	0.68455	0.503178	1	TEK	CC
actin filament bundle assembly	2/225	136/17910	0.511616	0.598415	0.430976	2	RGCC/S1PR1	BP
actin filament bundle organization	2/225	137/17910	0.515527	0.601087	0.432901	2	RGCC/S1PR1	BP
actin filament organization	4/225	325/17910	0.585756	0.657269	0.473363	4	RGCC/S1PR1/EMP2/CSF3	BP
actin filament polymerization	1/225	145/17910	0.841278	0.863684	0.622022	1	CSF3	BP
actin filament-based movement	2/225	132/17910	0.495765	0.583725	0.420397	2	EMP2/DSP	BP
actin filament-based process	11/225	661/17910	0.210785	0.338705	0.243934	11	TEK/ANKRD1/RGCC/S1PR1/EMP2/FGD5/CSF3/AQP1/DSP/EDN1/MYH11	BP
actin polymerization or depolymerization	1/225	170/17910	0.884614	0.901079	0.648954	1	CSF3	BP
actin-based cell projection	5/226	200/18675	0.0961252	0.233772	0.171834	5	TEK/AOC3/SPN/LRRK2/PROM2	CC
actin-mediated cell contraction	2/225	115/17910	0.424941	0.527517	0.379916	2	EMP2/DSP	BP
action potential	2/225	123/17910	0.45894	0.55496	0.39968	2	CD36/DSP	BP
activated T cell proliferation	2/225	41/17910	0.0936806	0.224003	0.161326	2	AGER/LRRC32	BP
activating transcription factor binding	2/213	64/16967	0.191848	0.364883	0.293488	2	ATOH8/FOS	MF
activation of adenylate cyclase activity	2/225	32/17910	0.0609185	0.17431	0.125538	2	ADRB2/ADRB1	BP
activation of cysteine-type endopeptidase activity	1/225	14/17910	0.162269	0.289472	0.208477	1	PERP	BP
activation of GTPase activity	1/225	47/17910	0.448416	0.546557	0.393629	1	CXCL13	BP
activation of immune response	14/225	647/17910	0.0343572	0.135873	0.0978554	14	RGCC/CPB2/CD36/FGR/MARCO/C5AR1/VSIG4/A2M/COLEC12/C7/SFTPD/SFTPA1/C1QA/C1QB	BP
activation of innate immune response	5/225	319/17910	0.372628	0.482859	0.347754	5	CD36/MARCO/COLEC12/SFTPD/SFTPA1	BP
activation of MAPK activity	3/225	147/17910	0.281471	0.402244	0.289695	3	C5AR1/LRRK2/CDK1	BP
activation of MAPKK activity	1/225	49/17910	0.462225	0.556805	0.401009	1	LRRK2	BP
activation of phospholipase C activity	1/225	30/17910	0.315852	0.434297	0.312779	1	C5AR1	BP
activation of protein kinase activity	9/225	303/17910	0.0146697	0.0763092	0.0549576	9	RGCC/ADRB2/EMP2/TPX2/TGFBR2/C5AR1/LRRK2/CDK1/GPRC5A	BP
activation of transmembrane receptor protein tyrosine kinase activity	1/225	12/17910	0.140802	0.268154	0.193124	1	ADRB2	BP
active transmembrane transporter activity	1/213	241/16967	0.953416	0.972153	0.781938	1	SLC46A2	MF
activin binding	1/213	11/16967	0.129778	0.305966	0.2461	1	ACVRL1	MF
activin receptor activity, type I	1/213	4/16967	0.0492817	0.209887	0.16882	1	ACVRL1	MF
activin receptor signaling pathway	1/225	40/17910	0.397249	0.504152	0.363089	1	ACVRL1	BP
activin-activated receptor activity	1/213	7/16967	0.0846497	0.264037	0.212375	1	ACVRL1	MF
actomyosin	1/226	67/18675	0.558341	0.723905	0.532106	1	TEK	CC
actomyosin structure organization	5/225	163/17910	0.0550567	0.169608	0.122151	5	ANKRD1/RGCC/S1PR1/EDN1/MYH11	BP
acute inflammatory response	8/225	220/17910	0.00676972	0.0424849	0.0305975	8	CPB2/C5AR1/VSIG4/A2M/C7/C1QA/C1QB/SERPINA1	BP
acute-phase response	1/225	47/17910	0.448416	0.546557	0.393629	1	SERPINA1	BP
acyl-CoA biosynthetic process	1/225	53/17910	0.488817	0.57831	0.416497	1	PDK4	BP
acyl-CoA metabolic process	1/225	93/17910	0.69235	0.740634	0.533402	1	PDK4	BP
acylglycerol biosynthetic process	1/225	41/17910	0.404838	0.510278	0.3675	1	LPL	BP
acylglycerol catabolic process	2/225	37/17910	0.0785672	0.200743	0.144574	2	FABP4/LPL	BP
acylglycerol homeostasis	1/225	36/17910	0.365916	0.475515	0.342464	1	LPL	BP
acylglycerol metabolic process	2/225	113/17910	0.416269	0.520688	0.374998	2	FABP4/LPL	BP
acylglycerol transport	1/225	7/17910	0.0847076	0.207349	0.149332	1	CD36	BP
adaptation of signaling pathway	1/225	21/17910	0.233285	0.357186	0.257244	1	ADRB2	BP
adaptive immune response	11/225	563/17910	0.0989906	0.22808	0.164262	11	AGER/EMP2/SPN/IL1RL1/LAMP3/IL33/C7/IL7R/C1QA/C1QB/CXCL13	BP
adaptive immune response based on somatic recombination of immune receptors built from immunoglobulin superfamily domains	10/225	295/17910	0.00424381	0.0302457	0.0217828	10	AGER/EMP2/SPN/IL1RL1/IL33/C7/IL7R/C1QA/C1QB/CXCL13	BP
adaptive thermogenesis	4/225	152/17910	0.124934	0.257119	0.185176	4	FABP4/ADRB2/ADRB1/CD36	BP
adenohypophysis development	1/225	13/17910	0.151603	0.27901	0.200942	1	SOX2	BP
adenyl nucleotide binding	24/213	1509/16967	0.135896	0.31465	0.253085	24	TEK/ACVRL1/NPR1/UBE2T/TOP2A/NME1/UBE2C/FGFR4/KIF20A/NEK2/FGR/KIF4A/AURKA/RECQL4/AURKB/CDC6/PDK4/TGFBR2/BUB1B/LRRK2/CDK1/PBK/FBP1/MYH11	MF
adenyl ribonucleotide binding	24/213	1502/16967	0.131128	0.307156	0.247057	24	TEK/ACVRL1/NPR1/UBE2T/TOP2A/NME1/UBE2C/FGFR4/KIF20A/NEK2/FGR/KIF4A/AURKA/RECQL4/AURKB/CDC6/PDK4/TGFBR2/BUB1B/LRRK2/CDK1/PBK/FBP1/MYH11	MF
adenylate cyclase binding	1/213	11/16967	0.129778	0.305966	0.2461	1	ADRB2	MF
adenylate cyclase-activating adrenergic receptor signaling pathway	1/225	16/17910	0.183202	0.310212	0.223414	1	ADRB1	BP
adenylate cyclase-activating G protein-coupled receptor signaling pathway	1/225	94/17910	0.696235	0.743713	0.53562	1	ADRB1	BP
adenylate cyclase-inhibiting G protein-coupled receptor signaling pathway	3/225	72/17910	0.0620857	0.175976	0.126737	3	S1PR1/MARCO/EDN1	BP
adenylate cyclase-modulating G protein-coupled receptor signaling pathway	4/225	162/17910	0.147335	0.277904	0.200145	4	S1PR1/ADRB1/MARCO/EDN1	BP
adherens junction	12/226	496/18675	0.0180085	0.080451	0.0591355	12	TEK/FHL1/CDH5/ARHGAP31/ESAM/TNS1/HMGA1/CAV2/NECTIN4/FERMT1/DSP/TNS4	CC
adherens junction assembly	2/225	90/17910	0.312584	0.432217	0.311281	2	TEK/ACVRL1	BP
adherens junction organization	6/225	134/17910	0.00696682	0.0435598	0.0313716	6	TEK/ACVRL1/CDH5/NECTIN4/DSP/CDH3	BP
adhesion of symbiont to host	1/225	15/17910	0.172801	0.301349	0.21703	1	SFTPD	BP
adhesion of symbiont to host cell	1/225	12/17910	0.140802	0.268154	0.193124	1	SFTPD	BP
ADP metabolic process	3/225	121/17910	0.195017	0.323424	0.232929	3	GPD1/GAPDH/FBP1	BP
adrenergic receptor activity	2/213	8/16967	0.00417876	0.0606432	0.0487775	2	ADRB2/ADRB1	MF
adrenergic receptor binding	1/213	17/16967	0.193351	0.364883	0.293488	1	ADRB1	MF
adrenergic receptor signaling pathway	2/225	22/17910	0.0307729	0.127254	0.091648	2	ADRB2/ADRB1	BP
adult behavior	1/225	137/17910	0.824244	0.850926	0.612834	1	FOXA2	BP
adult locomotory behavior	1/225	75/17910	0.613319	0.677847	0.488183	1	FOXA2	BP
aggrephagy	1/225	9/17910	0.10757	0.234674	0.169011	1	HSPB8	BP
aggresome	1/226	42/18675	0.400668	0.579785	0.42617	1	FGR	CC
aging	14/225	318/17910	5.2235e-05	0.00115422	0.000831265	14	AGER/RETN/HMGA1/AURKB/TGFBR2/LRRK2/FOXM1/CDK1/GJB2/EDN1/C1QA/FOS/NQO1/TP63	BP
alanine catabolic process	1/225	5/17910	0.0612622	0.17431	0.125538	1	GPT2	BP
alanine metabolic process	1/225	5/17910	0.0612622	0.17431	0.125538	1	GPT2	BP
alcohol binding	2/213	71/16967	0.223991	0.406153	0.326683	2	CRABP2/PROM2	MF
alcohol catabolic process	1/225	44/17910	0.427039	0.527796	0.380117	1	AKR1B10	BP
alcohol dehydrogenase (NADP+) activity	1/213	15/16967	0.172691	0.353606	0.284418	1	AKR1B10	MF
alcohol metabolic process	2/225	339/17910	0.928721	0.939744	0.6768	2	GPD1/AKR1B10	BP
alditol phosphate metabolic process	1/225	7/17910	0.0847076	0.207349	0.149332	1	GPD1	BP
aldo-keto reductase (NADP) activity	1/213	23/16967	0.252301	0.420734	0.338412	1	AKR1B10	MF
aldosterone secretion	1/225	6/17910	0.0730587	0.190736	0.137367	1	AGTR2	BP
alkaline phosphatase activity	1/213	4/16967	0.0492817	0.209887	0.16882	1	ALPL	MF
allyl-alcohol dehydrogenase activity	1/213	3/16967	0.0371927	0.194696	0.156601	1	AKR1B10	MF
alpha-2A adrenergic receptor binding	1/213	5/16967	0.0612196	0.230339	0.18527	1	ADRB1	MF
alpha-amino acid biosynthetic process	2/225	51/17910	0.134522	0.264099	0.190203	2	PYCR1/PSAT1	BP
alpha-amino acid catabolic process	1/225	98/17910	0.711293	0.754706	0.543537	1	GPT2	BP
alpha-amino acid metabolic process	3/225	200/17910	0.460957	0.556805	0.401009	3	PYCR1/PSAT1/GPT2	BP
alpha-beta T cell activation	3/225	133/17910	0.234213	0.35753	0.257492	3	AGER/SPN/TGFBR2	BP
alpha-beta T cell activation involved in immune response	1/225	61/17910	0.538138	0.618984	0.44579	1	SPN	BP
alpha-beta T cell differentiation	2/225	99/17910	0.353894	0.468163	0.337169	2	SPN/TGFBR2	BP
alpha-beta T cell differentiation involved in immune response	1/225	61/17910	0.538138	0.618984	0.44579	1	SPN	BP
alpha-beta T cell lineage commitment	1/225	19/17910	0.213629	0.338705	0.243934	1	SPN	BP
alpha-beta T cell proliferation	1/225	30/17910	0.315852	0.434297	0.312779	1	TGFBR2	BP
alveolar lamellar body	1/226	5/18675	0.059068	0.177204	0.130254	1	LAMP3	CC
ameboidal-type cell migration	18/225	446/17910	1.44199e-05	0.000458964	0.000330544	18	TEK/ACVRL1/RGCC/EMP2/PECAM1/CLEC14A/MMRN2/TNS1/AGTR2/HYAL1/TGFBR2/ANXA3/FERMT1/ATOH8/HBEGF/EDN1/NR4A1/CXCL13	BP
amelogenesis	1/225	21/17910	0.233285	0.357186	0.257244	1	PERP	BP
amide binding	10/213	266/16967	0.00200517	0.0355033	0.0285566	10	AGER/NPR1/ADRB2/VIPR1/CD36/MARCO/MSR1/KPNA2/SLC7A5/C1QA	MF
amide biosynthetic process	3/225	822/17910	0.998281	0.999689	0.719973	3	PDK4/GAPDH/KRT17	BP
amide transport	25/225	1752/17910	0.28015	0.400971	0.288778	25	ANKRD1/AGER/RGCC/CD36/LRRC32/IL1RL1/KIF20A/CACNA2D2/FGR/LPL/AGTR2/KPNA2/LRRK2/GAPDH/SLC2A1/LTBP4/FERMT1/IL33/MMP12/EDN1/COL1A1/SELENBP1/FOXA2/ALOX15B/SFN	BP
amine metabolic process	3/225	128/17910	0.217694	0.34392	0.24769	3	INMT/AOC3/NQO1	BP
amine transport	1/225	76/17910	0.618198	0.681709	0.490965	1	AGTR2	BP
amino acid transmembrane transport	1/225	72/17910	0.598309	0.665405	0.479223	1	SLC7A5	BP
amino acid transmembrane transporter activity	1/213	55/16967	0.501396	0.636794	0.512197	1	SLC7A5	MF
amino acid transport	1/225	134/17910	0.817397	0.845629	0.609019	1	SLC7A5	BP
aminoglycan biosynthetic process	3/225	108/17910	0.154715	0.283526	0.204195	3	OGN/HYAL1/B3GNT3	BP
aminoglycan catabolic process	3/225	63/17910	0.0448133	0.153793	0.110761	3	LYVE1/OGN/HYAL1	BP
aminoglycan metabolic process	6/225	161/17910	0.0162108	0.0818478	0.0589465	6	LYVE1/SPOCK2/OGN/HYAL1/NDNF/B3GNT3	BP
aminoglycoside antibiotic metabolic process	1/225	10/17910	0.118787	0.24699	0.177881	1	AKR1B10	BP
ammonium ion metabolic process	3/225	193/17910	0.437993	0.538591	0.387892	3	NPR1/AGTR2/AKR1B10	BP
ammonium transmembrane transport	1/225	12/17910	0.140802	0.268154	0.193124	1	AQP1	BP
ammonium transmembrane transporter activity	1/213	20/16967	0.223383	0.406153	0.326683	1	AQP1	MF
ammonium transport	2/225	81/17910	0.270751	0.391293	0.281808	2	AQP1/EDN1	BP
AMP binding	1/213	10/16967	0.118708	0.292245	0.235064	1	FBP1	MF
amyloid fibril formation	1/225	15/17910	0.172801	0.301349	0.21703	1	CD36	BP
amyloid precursor protein catabolic process	1/225	40/17910	0.397249	0.504152	0.363089	1	AGER	BP
amyloid precursor protein metabolic process	1/225	55/17910	0.501618	0.588585	0.423897	1	AGER	BP
amyloid-beta binding	6/213	71/16967	0.00026487	0.010685	0.00859435	6	AGER/ADRB2/CD36/MARCO/MSR1/C1QA	MF
amyloid-beta clearance	4/225	33/17910	0.000745552	0.00832502	0.00599565	4	CD36/MARCO/MSR1/C5AR1	BP
amyloid-beta clearance by cellular catabolic process	1/225	7/17910	0.0847076	0.207349	0.149332	1	CD36	BP
amyloid-beta metabolic process	1/225	40/17910	0.397249	0.504152	0.363089	1	MGAT3	BP
anagen	1/225	5/17910	0.0612622	0.17431	0.125538	1	FERMT1	BP
anaphase-promoting complex	2/226	21/18675	0.0263234	0.109282	0.0803277	2	UBE2C/BUB1B	CC
anaphase-promoting complex-dependent catabolic process	6/225	81/17910	0.000544515	0.00673747	0.0048523	6	UBE2C/CCNB1/AURKA/AURKB/BUB1B/CDK1	BP
anatomical structure formation involved in morphogenesis	35/225	1124/17910	5.83785e-07	4.17406e-05	3.00614e-05	35	TEK/ANKRD1/TMEM100/ACVRL1/ECSCR/RGCC/S1PR1/NPR1/CDH5/EMP2/FOXF1/PECAM1/CLEC14A/CD36/MMRN2/CTHRC1/HYAL1/TGFBR2/C5AR1/KLF2/ANXA3/ATOH8/NDNF/AQP1/EDN1/NR4A1/COL1A1/THBS2/MYH11/PERP/COL11A1/FOXA2/CXCL13/SOX2/TP63	BP
anatomical structure homeostasis	12/225	413/17910	0.00617204	0.0397957	0.0286607	12	LDB2/S1PR1/ADRB2/CLDN18/NEK2/RECQL4/AURKB/PDK4/LARGE2/SFTPD/CDH3/LYZ	BP
anatomical structure maturation	10/225	155/17910	2.68985e-05	0.000709767	0.000511172	10	ACVRL1/S1PR1/CDH5/CCNB1/AURKA/LRRK2/KLF2/FERMT1/CDH3/C1QA	BP
anatomical structure morphogenesis	60/225	2535/17910	5.40913e-07	4.06418e-05	2.92701e-05	60	TEK/ANKRD1/TMEM100/SEMA3G/ACVRL1/LYVE1/FHL1/ECSCR/RGCC/S1PR1/NPR1/CDH5/EMP2/FOXF1/FGD5/PECAM1/HHIP/CPB2/CLEC14A/CD36/MMRN2/CLDN5/CTHRC1/FGR/AURKA/AGTR2/HYAL1/PID1/TGFBR2/C5AR1/LRRK2/DOK2/KLF2/SPP1/ANXA3/ATOH8/CRABP2/NDNF/AQP1/SEMA3B/HBEGF/DSP/IL7R/MMP12/EDN1/NR4A1/COL1A1/THBS2/ALPL/MYH11/COL3A1/PERP/COL11A1/FOXA2/CXCL13/SFTPB/KRT17/MMP13/SOX2/TP63	BP
anchored component of membrane	2/226	156/18675	0.565396	0.723918	0.532116	2	CD52/ALPL	CC
anchoring junction	16/226	514/18675	0.000548484	0.00549821	0.00404146	16	TEK/FHL1/CDH5/ARHGAP31/ESAM/TNS1/HMGA1/CAV2/NECTIN4/FERMT1/DSP/PERP/TNS4/PKP1/DSG3/DSC3	CC
androgen biosynthetic process	1/225	11/17910	0.129864	0.257699	0.185594	1	HSD17B6	BP
androgen catabolic process	2/225	5/17910	0.00153255	0.0141832	0.0102147	2	HSD17B6/SPP1	BP
androgen metabolic process	2/225	28/17910	0.0479545	0.156268	0.112544	2	HSD17B6/SPP1	BP
angiogenesis	23/225	576/17910	1.06603e-06	6.50725e-05	4.6865e-05	23	TEK/TMEM100/ACVRL1/ECSCR/RGCC/S1PR1/NPR1/CDH5/EMP2/PECAM1/CLEC14A/MMRN2/HYAL1/TGFBR2/C5AR1/KLF2/ANXA3/NDNF/AQP1/EDN1/NR4A1/THBS2/CXCL13	BP
angiogenesis involved in wound healing	1/225	23/17910	0.252451	0.374787	0.26992	1	NDNF	BP
angiotensin receptor activity	1/213	4/16967	0.0492817	0.209887	0.16882	1	AGTR2	MF
angiotensin type II receptor activity	1/213	4/16967	0.0492817	0.209887	0.16882	1	AGTR2	MF
angiotensin-activated signaling pathway	1/225	14/17910	0.162269	0.289472	0.208477	1	AGTR2	BP
animal organ development	76/225	3403/17910	9.18438e-08	1.01786e-05	7.33058e-06	76	TEK/ANKRD1/TMEM100/LDB2/AGER/ACVRL1/FHL1/RGCC/S1PR1/ADRB2/FOXF1/CLDN18/PECAM1/HHIP/CPB2/RETN/TOP2A/NME1/SPN/CCNB1/CLDN5/OSCAR/SLC46A2/CTHRC1/CCNB2/FGR/CHRDL1/AURKA/CCNA2/AGTR2/HYAL1/TGFBR2/C5AR1/LRRK2/KLF2/CAV2/CDK1/SPP1/SLC2A1/HMGB3/ANXA3/CSF3/FERMT1/AQP1/HBEGF/SFTPD/DSP/IL7R/GJB2/EDN1/NRGN/CDH3/COL1A1/C1QB/ALPL/MYH11/COL3A1/FOS/PERP/COL11A1/FOXA2/ALOX15B/SFN/KRT15/CXCL14/SFTPB/KRT17/MMP13/SOX2/…	BP
animal organ formation	2/225	61/17910	0.178475	0.307852	0.221714	2	TGFBR2/TP63	BP
animal organ morphogenesis	27/225	989/17910	0.00012399	0.00221632	0.00159619	27	TEK/ANKRD1/TMEM100/ACVRL1/FHL1/S1PR1/FOXF1/HHIP/CPB2/CLDN5/CTHRC1/FGR/AGTR2/HYAL1/TGFBR2/LRRK2/AQP1/DSP/EDN1/COL1A1/ALPL/COL3A1/PERP/COL11A1/SFTPB/MMP13/TP63	BP
animal organ regeneration	7/225	75/17910	4.32463e-05	0.00100372	0.000722877	7	CPB2/AURKA/CCNA2/TGFBR2/C5AR1/CDK1/ANXA3	BP
anion binding	39/213	2573/16967	0.118184	0.292245	0.235064	39	TEK/ACVRL1/NPR1/FABP4/CAVIN2/UBE2T/CCL23/TOP2A/NME1/UBE2C/FGFR4/SELP/KIF20A/NEK2/FGR/KIF4A/AURKA/LPL/RECQL4/AURKB/CDC6/PDK4/TGFBR2/BUB1B/LRRK2/CDK1/ALOX5AP/ANXA3/GPT2/PBK/CRABP2/NDNF/HBEGF/FBP1/THBS2/MYH11/COL11A1/CXCL13/STEAP4	MF
anion channel activity	1/213	72/16967	0.598085	0.722986	0.581524	1	CLCA2	MF
anion homeostasis	1/225	50/17910	0.468999	0.56252	0.405125	1	FGFR4	BP
anion transmembrane transport	2/225	224/17910	0.775154	0.809293	0.58285	2	SLC7A5/CLCA2	BP
anion transmembrane transporter activity	3/213	240/16967	0.582723	0.708686	0.570022	3	SLC2A1/SLC7A5/CLCA2	MF
anion transport	8/225	542/17910	0.372193	0.482578	0.347551	8	FABP4/CD36/AGTR2/SLC2A1/AQP1/SLC7A5/EDN1/CLCA2	BP
annealing activity	1/213	10/16967	0.118708	0.292245	0.235064	1	RECQL4	MF
annealing helicase activity	1/213	7/16967	0.0846497	0.264037	0.212375	1	RECQL4	MF
anoikis	1/225	34/17910	0.349647	0.462959	0.333421	1	PDK4	BP
anterior/posterior axis specification	2/225	46/17910	0.113619	0.244146	0.175833	2	AURKA/FOXA2	BP
anterior/posterior pattern specification	3/225	182/17910	0.401212	0.5086	0.366292	3	FOXF1/AURKA/FOXA2	BP
anterograde axonal transport	1/225	43/17910	0.419732	0.522661	0.376419	1	KIF4A	BP
anterograde trans-synaptic signaling	8/225	591/17910	0.465707	0.560239	0.403482	8	AGER/ADRB2/RETN/CACNA2D2/LRRK2/EDN1/NRGN/NQO1	BP
antibacterial humoral response	2/225	44/17910	0.105516	0.234674	0.169011	2	SFTPD/SLPI	BP
antibiotic biosynthetic process	1/225	21/17910	0.233285	0.357186	0.257244	1	DUOX1	BP
antibiotic catabolic process	3/225	42/17910	0.0156693	0.0800254	0.057634	3	GPX3/DUOX1/AKR1B10	BP
antibiotic metabolic process	4/225	130/17910	0.0815124	0.206666	0.14884	4	GPX3/CYP4B1/DUOX1/AKR1B10	BP
antigen binding	2/213	150/16967	0.564132	0.692914	0.557336	2	SLC7A5/IL7R	MF
antigen processing and presentation	2/225	220/17910	0.766518	0.802356	0.577854	2	CD36/KIF4A	BP
antigen processing and presentation of exogenous antigen	2/225	176/17910	0.651413	0.708815	0.510486	2	CD36/KIF4A	BP
antigen processing and presentation of exogenous peptide antigen	2/225	174/17910	0.645242	0.704522	0.507394	2	CD36/KIF4A	BP
antigen processing and presentation of exogenous peptide antigen via MHC class I	1/225	78/17910	0.627771	0.68918	0.496345	1	CD36	BP
antigen processing and presentation of exogenous peptide antigen via MHC class I, TAP-dependent	1/225	75/17910	0.613319	0.677847	0.488183	1	CD36	BP
antigen processing and presentation of exogenous peptide antigen via MHC class II	1/225	97/17910	0.7076	0.752254	0.541771	1	KIF4A	BP
antigen processing and presentation of peptide antigen	2/225	188/17910	0.686658	0.736322	0.530296	2	CD36/KIF4A	BP
antigen processing and presentation of peptide antigen via MHC class I	1/225	95/17910	0.700071	0.746013	0.537276	1	CD36	BP
antigen processing and presentation of peptide antigen via MHC class II	1/225	100/17910	0.718541	0.760213	0.547503	1	KIF4A	BP
antigen processing and presentation of peptide or polysaccharide antigen via MHC class II	1/225	101/17910	0.722097	0.762701	0.549295	1	KIF4A	BP
antimicrobial humoral immune response mediated by antimicrobial peptide	1/225	55/17910	0.501618	0.588585	0.423897	1	GAPDH	BP
antimicrobial humoral response	5/225	106/17910	0.0108828	0.0606857	0.0437056	5	GAPDH/SFTPD/LYZ/SLPI/PI3	BP
antioxidant activity	3/213	65/16967	0.0483114	0.209887	0.16882	3	GPX3/DUOX1/NQO1	MF
aorta development	2/225	57/17910	0.160611	0.289472	0.208477	2	ACVRL1/COL3A1	BP
aorta morphogenesis	2/225	34/17910	0.0677983	0.187833	0.135276	2	ACVRL1/COL3A1	BP
aorta smooth muscle tissue morphogenesis	1/225	5/17910	0.0612622	0.17431	0.125538	1	COL3A1	BP
apical junction assembly	1/225	63/17910	0.549709	0.628311	0.452508	1	CLDN5	BP
apical junction complex	3/226	134/18675	0.221274	0.38585	0.283619	3	CLDN18/CLDN5/ESAM	CC
apical part of cell	10/226	365/18675	0.0137408	0.0620601	0.0456172	10	TEK/AGER/ADRB2/EMP2/CD36/C5AR1/SLC2A1/DUOX1/AQP1/SLC7A5	CC
apical plasma membrane	9/226	300/18675	0.0110734	0.0529204	0.0388991	9	TEK/AGER/ADRB2/EMP2/CD36/SLC2A1/DUOX1/AQP1/SLC7A5	CC
apicolateral plasma membrane	1/226	19/18675	0.206616	0.370826	0.272575	1	CLDN5	CC
apolipoprotein binding	1/213	16/16967	0.183086	0.36137	0.290663	1	LPL	MF
apoptotic cell clearance	2/225	38/17910	0.0822685	0.207349	0.149332	2	CD36/MARCO	BP
apoptotic chromosome condensation	1/225	5/17910	0.0612622	0.17431	0.125538	1	TOP2A	BP
apoptotic mitochondrial changes	2/225	119/17910	0.442083	0.541375	0.389896	2	SFN/TP63	BP
apoptotic nuclear changes	1/225	31/17910	0.324461	0.442021	0.318342	1	TOP2A	BP
apoptotic process	39/225	1907/17910	0.00151145	0.0141832	0.0102147	39	TEK/ANKRD1/ECSCR/RGCC/GIMAP8/HHIP/TOP2A/NME1/TPX2/MYBL2/SLC46A2/LAMP3/AURKA/AGTR2/AURKB/PDK4/TGFBR2/C5AR1/BUB1B/LRRK2/GAPDH/CDK1/CDCA7/ZNF385B/IL33/NDNF/AQP1/DUSP1/IL7R/EDN1/IGFBP3/PERP/TNS4/ALOX15B/SFN/PRAME/NQO1/SOX2/TP63	BP
apoptotic signaling pathway	7/225	579/17910	0.59438	0.662531	0.477153	7	AGTR2/LRRK2/ZNF385B/IL33/PERP/SFN/TP63	BP
appendage development	2/225	176/17910	0.651413	0.708815	0.510486	2	CRABP2/TP63	BP
appendage morphogenesis	2/225	146/17910	0.54979	0.628311	0.452508	2	CRABP2/TP63	BP
arachidonic acid binding	1/213	5/16967	0.0612196	0.230339	0.18527	1	ALOX5AP	MF
arachidonic acid metabolic process	1/225	40/17910	0.397249	0.504152	0.363089	1	ALOX15B	BP
aromatase activity	1/213	21/16967	0.233144	0.409191	0.329127	1	CYP4B1	MF
aromatic compound biosynthetic process	57/225	4099/17910	0.210587	0.338705	0.243934	57	GPD1/ANKRD1/TMEM100/AGER/ACVRL1/RGCC/S1PR1/NPR1/FABP4/ADRB2/FOXF1/CD36/TOP2A/NME1/FGFR4/CCNB1/MYBL2/RRM2/NEK2/CHRDL1/HMGA1/DLGAP5/CCNA2/AGTR2/AURKB/CDC6/PID1/PDK4/C5AR1/CDT1/FOXM1/KLF2/GAPDH/CDK1/MYRF/SPP1/PSAT1/CDCA7/ANXA3/CSF3/FOSB/ETV4/ATOH8/CRABP2/IL33/DUSP1/MMP12/EDN1/FBP1/NR4A1/CDH3/COL1A1/FOS/FOXA2/PRAME/SOX2/TP63	BP
aromatic compound catabolic process	4/225	655/17910	0.966854	0.972338	0.700274	4	GPD1/GAPDH/FBP1/PKP1	BP
arterial endothelial cell differentiation	1/225	6/17910	0.0730587	0.190736	0.137367	1	TMEM100	BP
artery development	3/225	100/17910	0.1314	0.259696	0.187032	3	ACVRL1/FOXF1/COL3A1	BP
artery morphogenesis	3/225	76/17910	0.0706166	0.190736	0.137367	3	ACVRL1/FOXF1/COL3A1	BP
artery smooth muscle contraction	1/225	9/17910	0.10757	0.234674	0.169011	1	EDN1	BP
aspartic-type endopeptidase inhibitor activity	1/213	4/16967	0.0492817	0.209887	0.16882	1	GAPDH	MF
associative learning	2/225	77/17910	0.252109	0.374787	0.26992	2	NRGN/FOS	BP
astrocyte activation	3/225	24/17910	0.00325867	0.0251229	0.0180935	3	AGER/C5AR1/C1QA	BP
astrocyte development	3/225	41/17910	0.0146834	0.0763092	0.0549576	3	AGER/C5AR1/C1QA	BP
astrocyte differentiation	3/225	77/17910	0.0728278	0.190736	0.137367	3	AGER/C5AR1/C1QA	BP
astrocyte end-foot	1/226	5/18675	0.059068	0.177204	0.130254	1	AQP4	CC
astrocyte projection	2/226	12/18675	0.00888421	0.0439929	0.0323369	2	AQP4/GJB2	CC
asymmetric synapse	1/226	294/18675	0.972899	0.999937	0.735003	1	NRGN	CC
AT DNA binding	1/213	9/16967	0.107498	0.284908	0.229162	1	HMGA1	MF
ATP binding	23/213	1451/16967	0.145808	0.327524	0.26344	23	TEK/ACVRL1/NPR1/UBE2T/TOP2A/NME1/UBE2C/FGFR4/KIF20A/NEK2/FGR/KIF4A/AURKA/RECQL4/AURKB/CDC6/PDK4/TGFBR2/BUB1B/LRRK2/CDK1/PBK/MYH11	MF
ATP biosynthetic process	4/225	150/17910	0.120641	0.250493	0.180404	4	GPD1/PID1/GAPDH/FBP1	BP
ATP generation from ADP	3/225	111/17910	0.163772	0.292036	0.210324	3	GPD1/GAPDH/FBP1	BP
ATP metabolic process	6/225	287/17910	0.153846	0.282284	0.2033	6	GPD1/CCNB1/PID1/GAPDH/CDK1/FBP1	BP
ATP synthesis coupled electron transport	2/225	90/17910	0.312584	0.432217	0.311281	2	CCNB1/CDK1	BP
ATP-dependent 3'-5' DNA helicase activity	1/213	4/16967	0.0492817	0.209887	0.16882	1	RECQL4	MF
ATP-dependent chromatin remodeling	1/225	77/17910	0.623015	0.684976	0.493317	1	CENPA	BP
ATP-dependent DNA helicase activity	1/213	31/16967	0.324282	0.499278	0.401588	1	RECQL4	MF
ATP-dependent helicase activity	1/213	52/16967	0.482075	0.628158	0.50525	1	RECQL4	MF
ATPase activity	2/213	280/16967	0.869516	0.919945	0.739945	2	TOP2A/RECQL4	MF
ATPase activity, coupled	2/213	218/16967	0.761849	0.857258	0.689524	2	TOP2A/RECQL4	MF
atrioventricular valve development	1/225	26/17910	0.280309	0.400971	0.288778	1	TGFBR2	BP
atrioventricular valve morphogenesis	1/225	24/17910	0.261854	0.383102	0.275909	1	TGFBR2	BP
attachment of mitotic spindle microtubules to kinetochore	1/225	10/17910	0.118787	0.24699	0.177881	1	CDT1	BP
attachment of spindle microtubules to kinetochore	4/225	29/17910	0.000450077	0.00606441	0.00436757	4	CCNB1/NEK2/AURKB/CDT1	BP
autolysosome	1/226	9/18675	0.103811	0.243807	0.17921	1	LRRK2	CC
autonomic nervous system development	1/225	44/17910	0.427039	0.527796	0.380117	1	TP63	BP
autophagosome	1/226	85/18675	0.64558	0.790534	0.581082	1	LRRK2	CC
autophagosome assembly	1/225	70/17910	0.587982	0.658379	0.474162	1	LRRK2	BP
autophagosome maturation	1/225	34/17910	0.349647	0.462959	0.333421	1	ADRB2	BP
autophagosome organization	1/225	73/17910	0.603376	0.669361	0.482071	1	LRRK2	BP
autophagy	5/225	471/17910	0.708866	0.753213	0.542461	5	ADRB2/LAMP3/LRRK2/GAPDH/HSPB8	BP
axis specification	2/225	80/17910	0.26609	0.387763	0.279266	2	AURKA/FOXA2	BP
axo-dendritic transport	1/225	61/17910	0.538138	0.618984	0.44579	1	KIF4A	BP
axon	6/226	527/18675	0.617116	0.76396	0.561548	6	TPX2/KIF4A/AURKA/LRRK2/ANXA3/NRGN	CC
axon cytoplasm	1/226	54/18675	0.482332	0.656418	0.4825	1	KIF4A	CC
axon development	5/225	438/17910	0.647244	0.706012	0.508468	5	SEMA3G/DOK2/SPP1/CRABP2/SEMA3B	BP
axon ensheathment	2/225	126/17910	0.471389	0.564775	0.406749	2	PRX/MYRF	BP
axon ensheathment in central nervous system	1/225	21/17910	0.233285	0.357186	0.257244	1	MYRF	BP
axon extension	1/225	101/17910	0.722097	0.762701	0.549295	1	SEMA3G	BP
axon guidance	2/225	210/17910	0.743668	0.782687	0.563689	2	DOK2/SEMA3B	BP
axon hillock	2/226	8/18675	0.00389116	0.0225249	0.0165569	2	TPX2/AURKA	CC
axon part	4/226	354/18675	0.623591	0.769657	0.565736	4	TPX2/KIF4A/AURKA/LRRK2	CC
axon regeneration	1/225	48/17910	0.455364	0.552141	0.39765	1	SPP1	BP
axon terminus	1/226	101/18675	0.708599	0.83688	0.615148	1	LRRK2	CC
axonal transport	1/225	51/17910	0.475689	0.567472	0.408692	1	KIF4A	BP
axonogenesis	5/225	393/17910	0.551305	0.62988	0.453638	5	SEMA3G/DOK2/SPP1/CRABP2/SEMA3B	BP
azole transport	1/225	22/17910	0.242928	0.364187	0.262286	1	EDN1	BP
azurophil granule	2/226	155/18675	0.5619	0.723918	0.532116	2	RETN/LYZ	CC
azurophil granule lumen	2/226	91/18675	0.301733	0.475143	0.349254	2	RETN/LYZ	CC
B cell activation	2/225	215/17910	0.755322	0.792507	0.570761	2	HMGB3/IL7R	BP
B cell apoptotic process	1/225	23/17910	0.252451	0.374787	0.26992	1	AURKB	BP
B cell chemotaxis	1/225	8/17910	0.0962107	0.224003	0.161326	1	CXCL13	BP
B cell differentiation	1/225	113/17910	0.761433	0.797597	0.574427	1	HMGB3	BP
B cell mediated immunity	3/225	173/17910	0.370638	0.480983	0.346403	3	C7/C1QA/C1QB	BP
B cell proliferation	1/225	71/17910	0.593178	0.661524	0.476427	1	IL7R	BP
B cell tolerance induction	1/225	3/17910	0.037219	0.135873	0.0978554	1	TGFBR2	BP
banded collagen fibril	3/226	11/18675	0.000268604	0.00324694	0.00238666	3	COL1A1/COL3A1/COL11A1	CC
basal part of cell	5/226	45/18675	0.000204519	0.00289853	0.00213056	5	TEK/GKN2/AQP1/EDN1/CLCA2	CC
basal plasma membrane	3/226	28/18675	0.00458302	0.025803	0.0189665	3	TEK/AQP1/CLCA2	CC
basement membrane	4/226	91/18675	0.0246449	0.105511	0.0775557	4	MMRN2/LAD1/THBS2/COL17A1	CC
basement membrane organization	2/225	21/17910	0.028205	0.119534	0.0860881	2	FERMT1/MMP11	BP
basolateral plasma membrane	8/226	201/18675	0.00317419	0.0197665	0.0145294	8	TEK/AQP4/C5AR1/SLC2A1/AQP1/DSP/PROM2/CLCA2	CC
behavior	8/225	578/17910	0.441005	0.540807	0.389487	8	AGER/RETN/CLDN5/AGTR2/LRRK2/NRGN/FOS/FOXA2	BP
benzene-containing compound metabolic process	1/225	23/17910	0.252451	0.374787	0.26992	1	CYP4B1	BP
beta-1,3-galactosyl-O-glycosyl-glycoprotein beta-1,3-N-acetylglucosaminyltransferase activity	1/213	3/16967	0.0371927	0.194696	0.156601	1	B3GNT3	MF
beta-adrenergic receptor activity	2/213	3/16967	0.000466698	0.0133787	0.010761	2	ADRB2/ADRB1	MF
beta-catenin binding	1/213	78/16967	0.627549	0.74661	0.600526	1	CDH5	MF
bicarbonate transport	1/225	42/17910	0.412332	0.516639	0.372081	1	AQP1	BP
bicellular tight junction	3/226	118/18675	0.171997	0.33033	0.242809	3	CLDN18/CLDN5/ESAM	CC
bicellular tight junction assembly	1/225	54/17910	0.495258	0.583438	0.42019	1	CLDN5	BP
bile acid biosynthetic process	1/225	36/17910	0.365916	0.475515	0.342464	1	FGFR4	BP
bile acid metabolic process	1/225	47/17910	0.448416	0.546557	0.393629	1	FGFR4	BP
bioactive lipid receptor activity	1/213	13/16967	0.151505	0.330456	0.265798	1	S1PR1	MF
biological adhesion	45/225	1345/17910	1.11031e-09	3.28132e-07	2.3632e-07	45	TEK/AGER/ACVRL1/LYVE1/RGCC/S1PR1/EMP2/FOXF1/CLDN18/PECAM1/SPOCK2/CD36/AOC3/SPN/CLDN5/LRRC32/CD93/ESAM/SELP/VWF/OLR1/HYAL1/TGFBR2/VSIG4/SPP1/FERMT1/NDNF/DUSP1/SFTPD/DSP/IL7R/MMP12/CDH3/COL1A1/THBS2/COL3A1/PERP/FOXA2/COL17A1/CXCL13/SOX2/PKP1/DSG3/DSC3/CLCA2	BP
biological phase	2/225	9/17910	0.00533704	0.0356849	0.0257001	2	FERMT1/CDH3	BP
biomineral tissue development	7/225	154/17910	0.00336124	0.0256903	0.0185021	7	S1PR1/ADRB2/FGR/SPP1/COL1A1/ALPL/MMP13	BP
biphenyl metabolic process	1/225	3/17910	0.037219	0.135873	0.0978554	1	CYP4B1	BP
blastocyst development	1/225	99/17910	0.71494	0.757488	0.54554	1	NEK2	BP
bleb assembly	1/225	11/17910	0.129864	0.257699	0.185594	1	EMP2	BP
blood circulation	12/225	523/17910	0.0330802	0.134622	0.0969546	12	TEK/AGER/ACVRL1/NPR1/EMP2/ADRB1/CACNA2D2/OLR1/AGTR2/HBEGF/DSP/EDN1	BP
blood coagulation	10/225	331/17910	0.00927319	0.0540896	0.0389551	10	CPB2/CD36/SELP/VWF/A2M/EDN1/COL1A1/COL3A1/FOXA2/SERPINA1	BP
blood coagulation, fibrin clot formation	2/225	27/17910	0.0448923	0.153793	0.110761	2	VWF/A2M	BP
blood coagulation, intrinsic pathway	2/225	18/17910	0.0210606	0.0972184	0.0700163	2	VWF/A2M	BP
blood microparticle	3/226	147/18675	0.263137	0.427467	0.31421	3	A2M/SLC2A1/C1QB	CC
blood vessel development	26/225	751/17910	2.92725e-06	0.000129765	9.34563e-05	26	TEK/TMEM100/ACVRL1/ECSCR/RGCC/S1PR1/NPR1/CDH5/EMP2/FOXF1/PECAM1/CLEC14A/MMRN2/HYAL1/TGFBR2/C5AR1/KLF2/ANXA3/NDNF/AQP1/EDN1/NR4A1/COL1A1/THBS2/COL3A1/CXCL13	BP
blood vessel endothelial cell differentiation	1/225	11/17910	0.129864	0.257699	0.185594	1	TMEM100	BP
blood vessel endothelial cell migration	7/225	182/17910	0.00825416	0.0493802	0.0355634	7	ACVRL1/RGCC/EMP2/CLEC14A/MMRN2/AGTR2/NR4A1	BP
blood vessel endothelial cell proliferation involved in sprouting angiogenesis	1/225	54/17910	0.495258	0.583438	0.42019	1	ACVRL1	BP
blood vessel maturation	3/225	7/17910	6.59744e-05	0.00137307	0.000988883	3	ACVRL1/S1PR1/CDH5	BP
blood vessel morphogenesis	25/225	670/17910	1.21743e-06	7.0089e-05	5.04778e-05	25	TEK/TMEM100/ACVRL1/ECSCR/RGCC/S1PR1/NPR1/CDH5/EMP2/FOXF1/PECAM1/CLEC14A/MMRN2/HYAL1/TGFBR2/C5AR1/KLF2/ANXA3/NDNF/AQP1/EDN1/NR4A1/THBS2/COL3A1/CXCL13	BP
blood vessel remodeling	2/225	45/17910	0.109548	0.237469	0.171025	2	ACVRL1/AGTR2	BP
BMP receptor activity	1/213	6/16967	0.0730083	0.246916	0.198603	1	ACVRL1	MF
BMP signaling pathway	3/225	134/17910	0.237544	0.362116	0.260795	3	TMEM100/ACVRL1/CHRDL1	BP
body fluid secretion	4/225	95/17910	0.0318185	0.130612	0.0940665	4	NPR1/NME1/AQP1/EDN1	BP
body morphogenesis	2/225	48/17910	0.121876	0.251759	0.181316	2	CLDN5/COL1A1	BP
bombesin receptor binding	1/213	3/16967	0.0371927	0.194696	0.156601	1	EDN1	MF
bone cell development	1/225	33/17910	0.341358	0.456344	0.328658	1	CLDN18	BP
bone development	6/225	189/17910	0.0323818	0.132425	0.0953719	6	TEK/CLDN18/TGFBR2/COL1A1/ALPL/MMP13	BP
bone growth	2/225	26/17910	0.0419063	0.145931	0.105099	2	TGFBR2/MMP13	BP
bone mineralization	4/225	108/17910	0.0473284	0.156268	0.112544	4	S1PR1/ADRB2/FGR/MMP13	BP
bone morphogenesis	5/225	90/17910	0.00554058	0.0368237	0.0265203	5	TEK/TGFBR2/COL1A1/ALPL/MMP13	BP
bone remodeling	5/225	81/17910	0.00353626	0.026797	0.0192991	5	S1PR1/ADRB2/CLDN18/CTHRC1/PDK4	BP
bone resorption	4/225	57/17910	0.00569329	0.0373901	0.0269282	4	S1PR1/ADRB2/CLDN18/PDK4	BP
bone trabecula formation	1/225	10/17910	0.118787	0.24699	0.177881	1	COL1A1	BP
bone trabecula morphogenesis	1/225	13/17910	0.151603	0.27901	0.200942	1	COL1A1	BP
bounding membrane of organelle	32/226	1955/18675	0.0476542	0.15795	0.116101	32	MCEMP1/ADRB2/EMP2/PECAM1/HHIP/CD36/NME1/CD93/SELP/HSD17B6/LAMP3/OLR1/MARCO/MGAT3/MSR1/MRC1/C5AR1/LRRK2/CAV2/SLC2A1/COLEC12/ANXA3/HBEGF/LARGE2/DSP/IL7R/PROM2/NRGN/B3GNT3/STEAP4/SERPINA1/PKP1	CC
brain development	12/225	694/17910	0.165117	0.293961	0.21171	12	S1PR1/NME1/AGTR2/TGFBR2/C5AR1/LRRK2/SLC2A1/ANXA3/AQP1/NRGN/COL3A1/SOX2	BP
brain renin-angiotensin system	1/225	4/17910	0.0493163	0.156268	0.112544	1	AGTR2	BP
branching involved in blood vessel morphogenesis	2/225	30/17910	0.054298	0.167388	0.120552	2	TGFBR2/EDN1	BP
branching involved in ureteric bud morphogenesis	1/225	60/17910	0.532242	0.614915	0.44286	1	AGTR2	BP
branching morphogenesis of a nerve	1/225	10/17910	0.118787	0.24699	0.177881	1	LRRK2	BP
branching morphogenesis of an epithelial tube	5/225	146/17910	0.0372402	0.135873	0.0978554	5	FOXF1/HHIP/AGTR2/TGFBR2/EDN1	BP
bronchus development	1/225	11/17910	0.129864	0.257699	0.185594	1	TGFBR2	BP
brown fat cell differentiation	3/225	41/17910	0.0146834	0.0763092	0.0549576	3	FABP4/ADRB2/ADRB1	BP
brush border	2/226	95/18675	0.319566	0.495629	0.364312	2	CD36/AQP1	CC
brush border membrane	2/226	49/18675	0.118595	0.264905	0.194718	2	CD36/AQP1	CC
bubble DNA binding	1/213	8/16967	0.0961456	0.274014	0.220399	1	RECQL4	MF
bundle of His cell to Purkinje myocyte communication	1/225	14/17910	0.162269	0.289472	0.208477	1	DSP	BP
bundle of His cell-Purkinje myocyte adhesion involved in cell communication	1/225	6/17910	0.0730587	0.190736	0.137367	1	DSP	BP
C-C chemokine binding	1/213	9/16967	0.107498	0.284908	0.229162	1	ACKR1	MF
C-X-C chemokine binding	1/213	6/16967	0.0730083	0.246916	0.198603	1	A2M	MF
cadherin binding	4/213	297/16967	0.51405	0.650122	0.522917	4	CCNB2/LAD1/GPRC5A/SFN	MF
cadmium ion transmembrane transport	1/225	4/17910	0.0493163	0.156268	0.112544	1	SLC39A8	BP
cadmium ion transport	1/225	4/17910	0.0493163	0.156268	0.112544	1	SLC39A8	BP
calcium ion binding	15/213	635/16967	0.014358	0.125411	0.100873	15	SPOCK2/AOC3/CD93/SELP/LPL/DUOX1/ANXA3/LTBP4/MMP12/GJB2/THBS2/ALOX15B/MMP13/DSG3/DSC3	MF
calcium ion homeostasis	6/225	388/17910	0.36159	0.473679	0.341142	6	S1PR1/CCL23/CD36/CD52/EDN1/CXCL13	BP
calcium ion regulated exocytosis	1/225	127/17910	0.800371	0.831118	0.598569	1	LRRK2	BP
calcium ion transmembrane transport	2/225	293/17910	0.885634	0.90191	0.649553	2	CACNA2D2/RRAD	BP
calcium ion transport	2/225	415/17910	0.968295	0.973566	0.701159	2	CACNA2D2/RRAD	BP
calcium-dependent cell-cell adhesion via plasma membrane cell adhesion molecules	1/225	28/17910	0.298305	0.416728	0.300126	1	SELP	BP
calcium-dependent phospholipid binding	1/213	26/16967	0.280147	0.455807	0.366622	1	ANXA3	MF
calcium-dependent protein binding	3/213	58/16967	0.0363447	0.194696	0.156601	3	SELP/A2M/ANXA3	MF
calcium-independent cell-cell adhesion via plasma membrane cell-adhesion molecules	2/225	23/17910	0.0334296	0.134721	0.0970259	2	CLDN18/CLDN5	BP
calcium-mediated signaling	4/225	188/17910	0.211776	0.338705	0.243934	4	TMEM100/SELP/LRRK2/EDN1	BP
calcium-mediated signaling using intracellular calcium source	1/225	22/17910	0.242928	0.364187	0.262286	1	SELP	BP
calmodulin binding	2/213	168/16967	0.6259	0.746123	0.600134	2	MYH11/RRAD	MF
calmodulin dependent kinase signaling pathway	1/225	8/17910	0.0962107	0.224003	0.161326	1	LRRK2	BP
camera-type eye development	2/225	295/17910	0.887924	0.903413	0.650635	2	ACVRL1/TGFBR2	BP
CAMKK-AMPK signaling cascade	1/225	7/17910	0.0847076	0.207349	0.149332	1	LRRK2	BP
cAMP-mediated signaling	1/225	143/17910	0.837181	0.861072	0.620141	1	ADRB1	BP
canonical glycolysis	1/225	27/17910	0.289363	0.408543	0.294231	1	GAPDH	BP
canonical Wnt signaling pathway	6/225	311/17910	0.197965	0.327332	0.235744	6	CTHRC1/LRRK2/FERMT1/CDH3/COL1A1/SOX2	BP
carbohydrate binding	11/213	252/16967	0.00035279	0.0111779	0.00899077	11	CLEC14A/CD93/SELP/OLR1/MRC1/SUSD2/PRG4/COLEC12/CHI3L2/SFTPD/FBP1	MF
carbohydrate biosynthetic process	5/225	194/17910	0.0982163	0.226531	0.163147	5	GPD1/GAPDH/SLC2A1/FBP1/B3GNT3	BP
carbohydrate catabolic process	3/225	185/17910	0.411317	0.516639	0.372081	3	GPD1/GAPDH/FBP1	BP
carbohydrate derivative binding	35/213	2090/16967	0.0455461	0.209887	0.16882	35	TEK/ACVRL1/NPR1/SPOCK2/UBE2T/CCL23/TOP2A/NME1/UBE2C/FGFR4/SELP/KIF20A/NEK2/FGR/KIF4A/AURKA/LPL/RECQL4/AURKB/CDC6/PDK4/TGFBR2/BUB1B/LRRK2/CDK1/LTBP4/PBK/NDNF/HBEGF/CHI3L2/FBP1/THBS2/MYH11/COL11A1/CXCL13	MF
carbohydrate derivative biosynthetic process	14/225	711/17910	0.0652477	0.182834	0.131676	14	GPD1/NPR1/NME1/RRM2/OGN/MGAT3/HYAL1/PID1/PDK4/GAPDH/HBEGF/LARGE2/FBP1/B3GNT3	BP
carbohydrate derivative catabolic process	5/225	176/17910	0.0714975	0.190736	0.137367	5	GPD1/LYVE1/OGN/HYAL1/MMP12	BP
carbohydrate derivative metabolic process	23/225	1169/17910	0.0219357	0.100145	0.0721241	23	GPD1/LYVE1/NPR1/SPOCK2/NME1/CCNB1/RRM2/OGN/MGAT3/HYAL1/PID1/PDK4/LRRK2/GAPDH/CDK1/NDNF/HBEGF/LARGE2/MMP12/FBP1/B3GNT3/COL11A1/AKR1B10	BP
carbohydrate homeostasis	6/225	228/17910	0.0683736	0.189083	0.136177	6	AGER/CPB2/NME1/FGFR4/PDK4/FOXA2	BP
carbohydrate mediated signaling	2/225	8/17910	0.00418556	0.0299751	0.021588	2	AGER/COLEC12	BP
carbohydrate metabolic process	10/225	589/17910	0.208009	0.335677	0.241753	10	GPD1/HYAL1/PDK4/GAPDH/SLC2A1/CHI3L2/FBP1/B3GNT3/IGFBP3/FOXA2	BP
carbohydrate phosphatase activity	1/213	6/16967	0.0730083	0.246916	0.198603	1	FBP1	MF
carbohydrate transmembrane transport	4/225	116/17910	0.0586221	0.17431	0.125538	4	PID1/PPBP/SLC2A1/EDN1	BP
carbohydrate transmembrane transporter activity	3/213	28/16967	0.00507046	0.0663569	0.0533733	3	PPBP/SLC2A1/AQP1	MF
carbohydrate transport	5/225	148/17910	0.0391209	0.140196	0.100969	5	PID1/PPBP/SLC2A1/AQP1/EDN1	BP
carbon catabolite activation of transcription	1/225	5/17910	0.0612622	0.17431	0.125538	1	FOXA2	BP
carbon catabolite activation of transcription from RNA polymerase II promoter	1/225	4/17910	0.0493163	0.156268	0.112544	1	FOXA2	BP
carbon catabolite regulation of transcription	1/225	5/17910	0.0612622	0.17431	0.125538	1	FOXA2	BP
carbon catabolite regulation of transcription from RNA polymerase II promoter	1/225	4/17910	0.0493163	0.156268	0.112544	1	FOXA2	BP
carbon dioxide transport	1/225	4/17910	0.0493163	0.156268	0.112544	1	AQP1	BP
carboxylic acid binding	4/213	176/16967	0.180688	0.36137	0.290663	4	FABP4/SELP/ALOX5AP/CRABP2	MF
carboxylic acid biosynthetic process	15/225	426/17910	0.00033397	0.00493496	0.00355414	15	GPD1/PYCR1/FGFR4/LPL/HYAL1/PDK4/GAPDH/PSAT1/ALOX5AP/ALOX5/GPT2/CRABP2/EDN1/FBP1/ALOX15B	BP
carboxylic acid catabolic process	3/225	250/17910	0.610825	0.67627	0.487047	3	LYVE1/HYAL1/GPT2	BP
carboxylic acid metabolic process	20/225	1006/17910	0.0287135	0.121457	0.0874729	20	GPD1/LYVE1/PYCR1/CD36/FGFR4/LPL/HYAL1/PDK4/GAPDH/PSAT1/SLC2A1/ALOX5AP/ALOX5/GPT2/CRABP2/SLC7A5/EDN1/FBP1/ALOX15B/NQO1	BP
carboxylic acid transmembrane transport	1/225	113/17910	0.761433	0.797597	0.574427	1	SLC7A5	BP
carboxylic acid transmembrane transporter activity	1/213	98/16967	0.711088	0.816937	0.657092	1	SLC7A5	MF
carboxylic acid transport	5/225	293/17910	0.308167	0.426774	0.307361	5	FABP4/CD36/AGTR2/SLC7A5/EDN1	BP
carboxylic ester hydrolase activity	1/213	120/16967	0.781586	0.863027	0.694164	1	LPL	MF
cardiac cell development	5/225	84/17910	0.00413409	0.0299751	0.021588	5	CCNB1/AGTR2/CDK1/EDN1/MYH11	BP
cardiac chamber development	5/225	170/17910	0.0636068	0.179598	0.129346	5	TEK/FOXF1/TGFBR2/DSP/COL11A1	BP
cardiac chamber morphogenesis	5/225	129/17910	0.0235066	0.104518	0.0752737	5	TEK/FOXF1/TGFBR2/DSP/COL11A1	BP
cardiac conduction	3/225	144/17910	0.27125	0.391293	0.281808	3	NPR1/CACNA2D2/DSP	BP
cardiac epithelial to mesenchymal transition	2/225	32/17910	0.0609185	0.17431	0.125538	2	TMEM100/TGFBR2	BP
cardiac left ventricle morphogenesis	2/225	14/17910	0.012945	0.0689726	0.0496739	2	FOXF1/TGFBR2	BP
cardiac muscle cell action potential	1/225	74/17910	0.608379	0.674068	0.485461	1	DSP	BP
cardiac muscle cell action potential involved in contraction	1/225	56/17910	0.507898	0.594695	0.428297	1	DSP	BP
cardiac muscle cell contraction	1/225	68/17910	0.57739	0.64986	0.468027	1	DSP	BP
cardiac muscle cell development	5/225	78/17910	0.00300321	0.0237736	0.0171217	5	CCNB1/AGTR2/CDK1/EDN1/MYH11	BP
cardiac muscle cell differentiation	5/225	121/17910	0.0183821	0.0891552	0.0642092	5	CCNB1/AGTR2/CDK1/EDN1/MYH11	BP
cardiac muscle cell proliferation	3/225	68/17910	0.0540726	0.167388	0.120552	3	CCNB1/TGFBR2/CDK1	BP
cardiac muscle cell-cardiac muscle cell adhesion	1/225	7/17910	0.0847076	0.207349	0.149332	1	DSP	BP
cardiac muscle contraction	1/225	132/17910	0.812686	0.841148	0.605792	1	DSP	BP
cardiac muscle fiber development	1/225	10/17910	0.118787	0.24699	0.177881	1	MYH11	BP
cardiac muscle hypertrophy	2/225	108/17910	0.39431	0.502581	0.361957	2	AGTR2/EDN1	BP
cardiac muscle tissue development	10/225	221/17910	0.000498724	0.00640057	0.00460967	10	ANKRD1/S1PR1/CCNB1/AGTR2/TGFBR2/CDK1/DSP/EDN1/MYH11/COL11A1	BP
cardiac muscle tissue growth	6/225	106/17910	0.00220905	0.0189414	0.0136416	6	S1PR1/CCNB1/AGTR2/TGFBR2/CDK1/EDN1	BP
cardiac muscle tissue growth involved in heart morphogenesis	1/225	3/17910	0.037219	0.135873	0.0978554	1	S1PR1	BP
cardiac muscle tissue morphogenesis	4/225	63/17910	0.00809976	0.0487857	0.0351353	4	ANKRD1/S1PR1/DSP/COL11A1	BP
cardiac septum development	1/225	113/17910	0.761433	0.797597	0.574427	1	TGFBR2	BP
cardiac septum morphogenesis	1/225	77/17910	0.623015	0.684976	0.493317	1	TGFBR2	BP
cardiac ventricle development	4/225	131/17910	0.0832949	0.207349	0.149332	4	FOXF1/TGFBR2/DSP/COL11A1	BP
cardiac ventricle morphogenesis	4/225	73/17910	0.0134363	0.0712475	0.0513122	4	FOXF1/TGFBR2/DSP/COL11A1	BP
cardiocyte differentiation	5/225	154/17910	0.0451059	0.154405	0.111202	5	CCNB1/AGTR2/CDK1/EDN1/MYH11	BP
cardiovascular system development	26/225	792/17910	7.58622e-06	0.000280248	0.000201833	26	TEK/TMEM100/ACVRL1/ECSCR/RGCC/S1PR1/NPR1/CDH5/EMP2/FOXF1/PECAM1/CLEC14A/MMRN2/HYAL1/TGFBR2/C5AR1/KLF2/ANXA3/NDNF/AQP1/EDN1/NR4A1/COL1A1/THBS2/COL3A1/CXCL13	BP
cargo receptor activity	9/213	85/16967	1.17938e-06	0.000177496	0.000142767	9	AGER/CD36/SCARA5/MARCO/MSR1/MRC1/SUSD2/PRG4/COLEC12	MF
cartilage condensation	1/225	19/17910	0.213629	0.338705	0.243934	1	COL11A1	BP
cartilage development	7/225	182/17910	0.00825416	0.0493802	0.0355634	7	ACVRL1/HYAL1/TGFBR2/EDN1/COL1A1/COL11A1/MMP13	BP
cartilage development involved in endochondral bone morphogenesis	3/225	26/17910	0.00410955	0.029914	0.021544	3	TGFBR2/COL1A1/MMP13	BP
catabolic process	36/225	2320/17910	0.104352	0.234674	0.169011	36	GPD1/LYVE1/ECSCR/FABP4/ADRB2/CD36/UBE2C/CCNB1/HSD17B6/GPX3/LAMP3/OGN/MGAT3/AURKA/LPL/AURKB/HYAL1/CYP4B1/BUB1B/LRRK2/GAPDH/CDK1/SPP1/DUOX1/GPT2/PBK/MMP11/IL33/HSPB8/MMP12/FBP1/MMP1/AKR1B10/MMP13/PKP1/MMP10	BP
catagen	1/225	4/17910	0.0493163	0.156268	0.112544	1	CDH3	BP
catalytic activity	62/213	4828/16967	0.441753	0.593606	0.477459	62	GPD1/TEK/ACVRL1/PTPN21/NPR1/INMT/HHIP/UBE2T/PYCR1/TOP2A/AOC3/NME1/UBE2C/FGFR4/HSD17B6/RRM2/GPX3/NEK2/FGR/MGAT3/DLGAP5/AURKA/LPL/CCNA2/RECQL4/AURKB/HYAL1/PDK4/TGFBR2/CYP4B1/BUB1B/LRRK2/GAPDH/CDK1/MYRF/PSAT1/ALOX5/DUOX1/GPT2/CDKN3/LTBP4/PBK/ALG1L/LARGE2/DUSP1/MMP12/FBP1/MMP1/B3GNT3/SELENBP1/ALPL/MYH11/RRAD/ALOX15B/LYZ/GPX2/STEAP4/NQO1/AKR1B10/MMP13/MMP10/CLCA2	MF
catalytic activity, acting on a glycoprotein	2/213	20/16967	0.0256897	0.189157	0.152146	2	MGAT3/B3GNT3	MF
catalytic activity, acting on a protein	31/213	1837/16967	0.0537447	0.226117	0.181875	31	TEK/ACVRL1/PTPN21/NPR1/UBE2T/UBE2C/FGFR4/NEK2/FGR/MGAT3/DLGAP5/AURKA/CCNA2/AURKB/PDK4/TGFBR2/BUB1B/LRRK2/GAPDH/CDK1/MYRF/CDKN3/LTBP4/PBK/DUSP1/MMP12/MMP1/B3GNT3/MMP13/MMP10/CLCA2	MF
catalytic activity, acting on DNA	3/213	152/16967	0.298196	0.476165	0.382997	3	TOP2A/NME1/RECQL4	MF
catalytic complex	7/226	1103/18675	0.982097	0.999937	0.735003	7	GPD1/UBE2C/CCNB1/RRM2/CCNA2/BUB1B/CDK1	CC
catechol-containing compound biosynthetic process	1/225	19/17910	0.213629	0.338705	0.243934	1	AGTR2	BP
catechol-containing compound metabolic process	2/225	51/17910	0.134522	0.264099	0.190203	2	NPR1/AGTR2	BP
catecholamine binding	1/213	12/16967	0.14071	0.317255	0.25518	1	ADRB2	MF
catecholamine biosynthetic process	1/225	19/17910	0.213629	0.338705	0.243934	1	AGTR2	BP
catecholamine metabolic process	2/225	51/17910	0.134522	0.264099	0.190203	2	NPR1/AGTR2	BP
catecholamine secretion	1/225	41/17910	0.404838	0.510278	0.3675	1	AGTR2	BP
catecholamine transport	1/225	54/17910	0.495258	0.583438	0.42019	1	AGTR2	BP
cation binding	49/213	4133/16967	0.703354	0.809597	0.651188	49	ACVRL1/FHL1/FGD5/HHIP/SPOCK2/CPB2/TOP2A/AOC3/NME1/CD93/SELP/RRM2/CACNA2D2/NEK2/LPL/AURKB/TGFBR2/CYP4B1/LRRK2/MT1M/KLF2/COLEC12/ZNF385B/ALOX5/DUOX1/ANXA3/LTBP4/MMP11/LARGE2/COL10A1/MMP12/GJB2/FBP1/NR4A1/MMP1/COL1A1/THBS2/ALPL/COL3A1/IGFBP3/COL11A1/ALOX15B/STEAP4/MMP13/DSG3/MMP10/TP63/DSC3/CLCA2	MF
cation channel activity	1/213	254/16967	0.960567	0.976793	0.78567	1	AQP1	MF
cation homeostasis	14/225	588/17910	0.0168626	0.0833356	0.060018	14	S1PR1/NPR1/CCL23/SCN7A/CD36/SCARA5/AGTR2/PDK4/LRRK2/CD52/C7/EDN1/CXCL13/STEAP4	BP
cation transmembrane transport	7/225	730/17910	0.815699	0.844069	0.607896	7	FHL1/ADRB2/SLC39A8/SCARA5/CACNA2D2/AQP1/RRAD	BP
cation transmembrane transporter activity	1/213	484/16967	0.997978	0.999938	0.804286	1	AQP1	MF
cation transport	9/225	1038/17910	0.91011	0.923019	0.664755	9	FHL1/ADRB2/SCN7A/SLC39A8/SCARA5/CACNA2D2/AQP1/EDN1/RRAD	BP
caveola	5/226	79/18675	0.00270654	0.0188828	0.0138798	5	CAVIN2/TGFBR2/LRRK2/CAV2/SLC2A1	CC
caveola assembly	1/225	4/17910	0.0493163	0.156268	0.112544	1	CAV2	BP
caveolin-mediated endocytosis	1/225	11/17910	0.129864	0.257699	0.185594	1	PROM2	BP
CCR chemokine receptor binding	2/213	26/16967	0.0418454	0.209887	0.16882	2	CCL23/CXCL13	MF
CCR1 chemokine receptor binding	1/213	5/16967	0.0612196	0.230339	0.18527	1	CCL23	MF
CCR10 chemokine receptor binding	1/213	3/16967	0.0371927	0.194696	0.156601	1	CXCL13	MF
CD4-positive or CD8-positive, alpha-beta T cell lineage commitment	1/225	20/17910	0.223519	0.349263	0.251538	1	SPN	BP
CD4-positive, alpha-beta T cell activation	3/225	90/17910	0.104234	0.234674	0.169011	3	AGER/SPN/TGFBR2	BP
CD4-positive, alpha-beta T cell differentiation	1/225	74/17910	0.608379	0.674068	0.485461	1	SPN	BP
CD4-positive, alpha-beta T cell differentiation involved in immune response	1/225	60/17910	0.532242	0.614915	0.44286	1	SPN	BP
CD4-positive, alpha-beta T cell lineage commitment	1/225	17/17910	0.193473	0.321584	0.231604	1	SPN	BP
CD4-positive, alpha-beta T cell proliferation	1/225	9/17910	0.10757	0.234674	0.169011	1	TGFBR2	BP
cell activation	37/225	1342/17910	4.78404e-06	0.000196367	0.000141423	37	MCEMP1/AGER/RGCC/FOXF1/PECAM1/RETN/CD36/SPN/LRRC32/CD93/IL1RL1/SELP/VWF/OSCAR/SLC46A2/FGR/OLR1/TGFBR2/C5AR1/LRRK2/VSIG4/PPBP/HMGB3/ALOX5/ANXA3/IL33/SFTPD/DSP/IL7R/EDN1/COL1A1/C1QA/COL3A1/LYZ/SLPI/SERPINA1/PKP1	BP
cell activation involved in immune response	20/225	688/17910	0.0004442	0.00601366	0.00433102	20	MCEMP1/FOXF1/PECAM1/RETN/CD36/SPN/CD93/OSCAR/FGR/OLR1/C5AR1/PPBP/ALOX5/ANXA3/IL33/DSP/LYZ/SLPI/SERPINA1/PKP1	BP
cell adhesion	45/225	1338/17910	9.41595e-10	3.15013e-07	2.26871e-07	45	TEK/AGER/ACVRL1/LYVE1/RGCC/S1PR1/EMP2/FOXF1/CLDN18/PECAM1/SPOCK2/CD36/AOC3/SPN/CLDN5/LRRC32/CD93/ESAM/SELP/VWF/OLR1/HYAL1/TGFBR2/VSIG4/SPP1/FERMT1/NDNF/DUSP1/SFTPD/DSP/IL7R/MMP12/CDH3/COL1A1/THBS2/COL3A1/PERP/FOXA2/COL17A1/CXCL13/SOX2/PKP1/DSG3/DSC3/CLCA2	BP
cell adhesion involved in heart morphogenesis	1/225	5/17910	0.0612622	0.17431	0.125538	1	TGFBR2	BP
cell adhesion mediated by integrin	2/225	61/17910	0.178475	0.307852	0.221714	2	FERMT1/CXCL13	BP
cell adhesion mediator activity	1/213	42/16967	0.412126	0.572979	0.460868	1	DSP	MF
cell adhesion molecule binding	10/213	444/16967	0.0540879	0.226117	0.181875	10	EMP2/VWF/CCNB2/SPP1/LTBP4/LAD1/DSP/GPRC5A/COL3A1/SFN	MF
cell adhesion molecule production	1/225	10/17910	0.118787	0.24699	0.177881	1	COLEC12	BP
cell adhesive protein binding involved in bundle of His cell-Purkinje myocyte communication	1/213	5/16967	0.0612196	0.230339	0.18527	1	DSP	MF
cell aggregation	1/225	20/17910	0.223519	0.349263	0.251538	1	COL11A1	BP
cell aging	4/225	116/17910	0.0586221	0.17431	0.125538	4	HMGA1/FOXM1/CDK1/TP63	BP
cell body	9/226	522/18675	0.18325	0.343908	0.252789	9	TMEM100/ACVRL1/TPX2/AURKA/LRRK2/ANXA3/GJB2/NRGN/NQO1	CC
cell chemotaxis	11/225	253/17910	0.000369772	0.00537443	0.00387065	11	VEGFD/S1PR1/CCL23/C5AR1/HBEGF/DUSP1/SFTPD/EDN1/NR4A1/CXCL13/CXCL14	BP
cell chemotaxis to fibroblast growth factor	1/225	11/17910	0.129864	0.257699	0.185594	1	CXCL13	BP
cell communication involved in cardiac conduction	1/225	56/17910	0.507898	0.594695	0.428297	1	DSP	BP
cell cortex	3/226	229/18675	0.525938	0.692823	0.509259	3	MYZAP/CLDN5/SLC2A1	CC
cell cortex part	3/226	128/18675	0.20244	0.368155	0.270612	3	MYZAP/CLDN5/SLC2A1	CC
cell cycle	37/225	1716/17910	0.000785196	0.00874566	0.0062986	37	FHL1/RGCC/TOP2A/UBE2C/CCNB1/TPX2/MYBL2/NUSAP1/KIF20A/RRM2/CEP55/NEK2/CCNB2/KIF4A/DLGAP5/AURKA/CCNA2/AURKB/HYAL1/CDC6/BUB1B/CDT1/PRC1/FOXM1/NCAPH/SUSD2/CAV2/CDK1/CENPA/CDKN3/PBK/DUSP1/EDN1/NR4A1/ALOX15B/SFN/SOX2	BP
cell cycle arrest	9/225	231/17910	0.00264713	0.0215358	0.01551	9	RGCC/CCNB1/AURKA/FOXM1/CDK1/CDKN3/DUSP1/SFN/SOX2	BP
cell cycle checkpoint	10/225	197/17910	0.00019979	0.0032442	0.00233646	10	RGCC/CCNB1/AURKA/AURKB/CDC6/BUB1B/CDT1/CDK1/DUSP1/SFN	BP
cell cycle DNA replication	1/225	57/17910	0.5141	0.599581	0.431816	1	CDT1	BP
cell cycle G1/S phase transition	13/225	288/17910	7.52677e-05	0.00153056	0.0011023	13	FHL1/RGCC/CCNB1/RRM2/AURKA/CCNA2/HYAL1/CDC6/CDT1/SUSD2/CDK1/CDKN3/SFN	BP
cell cycle G2/M phase transition	10/225	257/17910	0.00157328	0.0144098	0.0103779	10	FHL1/CCNB1/TPX2/NEK2/CCNB2/AURKA/CCNA2/AURKB/FOXM1/CDK1	BP
cell cycle phase transition	22/225	609/17910	9.19113e-06	0.000320821	0.000231054	22	FHL1/RGCC/UBE2C/CCNB1/TPX2/RRM2/NEK2/CCNB2/DLGAP5/AURKA/CCNA2/AURKB/HYAL1/CDC6/BUB1B/CDT1/FOXM1/SUSD2/CDK1/CDKN3/DUSP1/SFN	BP
cell cycle process	34/225	1280/17910	2.65051e-05	0.000704049	0.000507054	34	FHL1/RGCC/TOP2A/UBE2C/CCNB1/TPX2/MYBL2/NUSAP1/KIF20A/RRM2/CEP55/NEK2/CCNB2/KIF4A/DLGAP5/AURKA/CCNA2/AURKB/HYAL1/CDC6/BUB1B/CDT1/PRC1/FOXM1/NCAPH/SUSD2/CAV2/CDK1/CENPA/CDKN3/DUSP1/EDN1/SFN/SOX2	BP
cell death	54/225	2178/17910	5.74849e-07	4.17406e-05	3.00614e-05	54	TEK/ANKRD1/ECSCR/RGCC/EMP2/GIMAP8/HHIP/PYCR1/CD36/TOP2A/NME1/TPX2/MYBL2/SLC46A2/LAMP3/AURKA/AGTR2/AURKB/PDK4/TGFBR2/C5AR1/BUB1B/LRRK2/GAPDH/CDK1/CDCA7/ZNF385B/CSF3/IL33/NDNF/AQP1/DUSP1/DSP/IL7R/EDN1/C1QA/FOS/IGFBP3/PERP/TNS4/ALOX15B/SFN/PRAME/KRT15/NQO1/KRT17/SOX2/PKP1/DSG3/TP63/DSC3/SPRR2D/SPRR3/PI3	BP
cell death in response to hydrogen peroxide	2/225	35/17910	0.0713301	0.190736	0.137367	2	PYCR1/LRRK2	BP
cell death in response to oxidative stress	2/225	92/17910	0.321824	0.441276	0.317806	2	PYCR1/LRRK2	BP
cell development	34/225	1971/17910	0.0347024	0.135873	0.0978554	34	TEK/ANKRD1/SEMA3G/AGER/CDH5/CLDN18/PECAM1/NME1/CCNB1/CLDN5/CACNA2D2/CTHRC1/AURKA/AGTR2/TGFBR2/C5AR1/LRRK2/DOK2/KLF2/CAV2/CDK1/MYRF/SPP1/CRABP2/NDNF/SEMA3B/EDN1/C1QA/MYH11/COL3A1/COL11A1/SFN/SOX2/TP63	BP
cell differentiation	88/225	3923/17910	3.32235e-09	7.01331e-07	5.05096e-07	88	TEK/ANKRD1/VEGFD/GDF10/TMEM100/SEMA3G/AGER/ACVRL1/FHL1/ECSCR/RGCC/S1PR1/FABP4/ADRB2/CDH5/EMP2/FOXF1/CLDN18/PECAM1/ADRB1/HHIP/SPOCK2/RETN/CD36/TOP2A/NME1/SPN/CCNB1/CLDN5/OSCAR/SLC46A2/CACNA2D2/CTHRC1/CHRDL1/MSR1/AURKA/LPL/AGTR2/TGFBR2/C5AR1/LRRK2/DOK2/KLF2/A2M/CAV2/CDK1/MYRF/SPP1/HMGB3/LTBP4/CSF3/ATOH8/MMP11/CRABP2/IL33/NDNF/SLC7A5/SEMA3B/DSP/IL7R/EDN1/NR4A1/CDH3/COL1A1/C1QA/ALPL/MYH11/COL3A1/FOS/…	BP
cell division	25/225	575/17910	7.03197e-08	8.42506e-06	6.0677e-06	25	VEGFD/TOP2A/UBE2C/CCNB1/TPX2/NUSAP1/KIF20A/CEP55/NEK2/CCNB2/KIF4A/AURKA/CCNA2/AURKB/CDC6/BUB1B/CDT1/PRC1/NCAPH/PPBP/SUSD2/CDK1/CENPA/SFN/TP63	BP
cell division site	2/226	57/18675	0.151434	0.302133	0.222082	2	KIF20A/CEP55	CC
cell division site part	2/226	57/18675	0.151434	0.302133	0.222082	2	KIF20A/CEP55	CC
cell fate commitment	3/225	238/17910	0.577441	0.64986	0.468027	3	SPN/FOXA2/SOX2	BP
cell fate commitment involved in formation of primary germ layer	1/225	34/17910	0.349647	0.462959	0.333421	1	SOX2	BP
cell fate specification	2/225	79/17910	0.261429	0.383102	0.275909	2	FOXA2/SOX2	BP
cell growth	17/225	466/17910	8.78582e-05	0.00171575	0.00123568	17	SEMA3G/ACVRL1/FHL1/NPR1/AURKA/AGTR2/HYAL1/TGFBR2/SPP1/LTBP4/CRABP2/HBEGF/EDN1/FBP1/IGFBP3/SFN/KRT17	BP
cell growth involved in cardiac muscle cell development	2/225	39/17910	0.0860225	0.209411	0.150817	2	AGTR2/EDN1	BP
cell junction	29/226	1247/18675	0.00054575	0.00549821	0.00404146	29	MYZAP/TEK/PRX/AGER/FHL1/CDH5/CLDN18/PECAM1/ARHGAP31/FGFR4/CLDN5/ESAM/TNS1/HMGA1/LRRK2/CAV2/SLC2A1/NECTIN4/FERMT1/DSP/GJB2/PERP/TNS4/FOXA2/COL17A1/PKP1/DSG3/DSC3/CLCA2	CC
cell junction assembly	7/225	214/17910	0.0187254	0.0901639	0.0649357	7	TEK/ACVRL1/CDH5/CLDN5/TNS1/GJB2/COL17A1	BP
cell junction organization	10/225	277/17910	0.00271735	0.0219019	0.0157736	10	TEK/ACVRL1/CDH5/CLDN5/TNS1/NECTIN4/DSP/GJB2/CDH3/COL17A1	BP
cell killing	5/225	156/17910	0.047216	0.156268	0.112544	5	AGER/EMP2/GAPDH/IL7R/LYZ	BP
cell leading edge	6/226	384/18675	0.321331	0.496493	0.364947	6	LDB2/FGD5/NME1/FGR/DUOX1/FERMT1	CC
cell maturation	5/225	167/17910	0.0598557	0.17431	0.125538	5	CCNB1/AURKA/LRRK2/KLF2/C1QA	BP
cell migration	48/225	1474/17910	6.71166e-10	2.56421e-07	1.84674e-07	48	TEK/VEGFD/LDB2/AGER/ACVRL1/RGCC/S1PR1/EMP2/FOXF1/PECAM1/CCL23/CLEC14A/MMRN2/SPN/FGFR4/ESAM/TNS1/SELP/CTHRC1/FGR/OLR1/MGAT3/AGTR2/HYAL1/TGFBR2/C5AR1/LRRK2/DOK2/CDK1/ANXA3/FERMT1/ATOH8/IL33/NDNF/SLC7A5/HBEGF/DUSP1/SFTPD/MMP12/EDN1/NR4A1/MMP1/COL1A1/COL3A1/IGFBP3/ALOX15B/CXCL13/CXCL14	BP
cell migration involved in sprouting angiogenesis	3/225	101/17910	0.134243	0.264099	0.190203	3	CLEC14A/MMRN2/NR4A1	BP
cell morphogenesis	13/225	873/17910	0.304097	0.423652	0.305113	13	TEK/SEMA3G/FGD5/PECAM1/FGR/AURKA/LRRK2/DOK2/KLF2/SPP1/CRABP2/SEMA3B/IL7R	BP
cell morphogenesis involved in differentiation	8/225	632/17910	0.541788	0.62286	0.448581	8	TEK/SEMA3G/PECAM1/LRRK2/DOK2/SPP1/CRABP2/SEMA3B	BP
cell morphogenesis involved in neuron differentiation	6/225	500/17910	0.602395	0.669277	0.482011	6	SEMA3G/LRRK2/DOK2/SPP1/CRABP2/SEMA3B	BP
cell motility	50/225	1611/17910	1.40654e-09	3.66775e-07	2.6415e-07	50	TEK/VEGFD/LDB2/AGER/ACVRL1/RGCC/S1PR1/EMP2/FOXF1/PECAM1/SPOCK2/CCL23/CLEC14A/MMRN2/SPN/FGFR4/ESAM/TNS1/SELP/CTHRC1/FGR/OLR1/MGAT3/AGTR2/HYAL1/TGFBR2/C5AR1/LRRK2/DOK2/CDK1/DUOX1/ANXA3/FERMT1/ATOH8/IL33/NDNF/SLC7A5/HBEGF/DUSP1/SFTPD/MMP12/EDN1/NR4A1/MMP1/COL1A1/COL3A1/IGFBP3/ALOX15B/CXCL13/CXCL14	BP
cell part morphogenesis	8/225	595/17910	0.473268	0.566873	0.40826	8	SEMA3G/AURKA/PID1/LRRK2/DOK2/SPP1/CRABP2/SEMA3B	BP
cell projection	25/226	1917/18675	0.37718	0.555631	0.408416	25	TEK/ACVRL1/FGD5/HHIP/SCN7A/CD36/AOC3/NME1/SPN/TPX2/AQP4/FGR/KIF4A/AURKA/LRRK2/SPP1/ANXA3/FERMT1/AQP1/PROM2/GJB2/NRGN/FOS/NQO1/TP63	CC
cell projection assembly	5/225	521/17910	0.787217	0.819991	0.590555	5	S1PR1/EMP2/FGD5/NEK2/CDK1	BP
cell projection membrane	8/226	317/18675	0.0395759	0.14787	0.108692	8	FGD5/HHIP/CD36/NME1/FGR/FERMT1/AQP1/PROM2	CC
cell projection morphogenesis	7/225	577/17910	0.590713	0.661104	0.476125	7	SEMA3G/AURKA/LRRK2/DOK2/SPP1/CRABP2/SEMA3B	BP
cell projection organization	18/225	1400/17910	0.494994	0.583438	0.42019	18	ANKRD1/SEMA3G/AGER/S1PR1/EMP2/FGD5/NME1/CTHRC1/NEK2/AURKA/LRRK2/DOK2/CDK1/SPP1/CRABP2/NDNF/SEMA3B/PROM2	BP
cell projection part	17/226	1308/18675	0.416261	0.585902	0.430667	17	ACVRL1/FGD5/HHIP/CD36/NME1/TPX2/FGR/KIF4A/AURKA/LRRK2/ANXA3/FERMT1/AQP1/PROM2/NRGN/NQO1/TP63	CC
cell proliferation	57/225	1969/17910	9.94852e-10	3.15013e-07	2.26871e-07	57	TEK/VEGFD/AGER/ACVRL1/RGCC/S1PR1/NPR1/CDH5/EMP2/FOXF1/VIPR1/HHIP/CPB2/CCL23/NME1/SPN/FGFR4/CCNB1/LRRC32/CTHRC1/OGN/HMGA1/DLGAP5/CCNA2/AGTR2/AURKB/HYAL1/CDC6/PID1/TGFBR2/C5AR1/LRRK2/PRC1/FOXM1/VSIG4/CAV2/CDK1/CDCA7/CDKN3/FERMT1/ATOH8/IL33/AQP1/HBEGF/DUSP1/SFTPD/IL7R/MMP12/EDN1/NR4A1/CDH3/IGFBP3/ALOX15B/SFN/PRAME/SOX2/TP63	BP
cell proliferation in hindbrain	1/225	11/17910	0.129864	0.257699	0.185594	1	C5AR1	BP
cell recognition	3/225	129/17910	0.220979	0.348488	0.25098	3	PECAM1/CD36/COLEC12	BP
cell surface	28/226	667/18675	1.04283e-08	7.14337e-07	5.25073e-07	28	TEK/AGER/ACVRL1/S1PR1/CDH5/EMP2/PECAM1/HHIP/CLEC14A/CD36/AOC3/SPN/LRRC32/CD93/IL1RL1/TNS1/SELP/SLC46A2/SCARA5/AQP4/LPL/MRC1/TGFBR2/C5AR1/DUOX1/HBEGF/IL7R/PROM2	CC
cell surface receptor signaling pathway	59/225	2831/17910	3.87912e-05	0.000934574	0.000673077	59	TEK/VEGFD/GDF10/TMEM100/AGER/ACVRL1/S1PR1/NPR1/ADRB2/CDH5/EMP2/FOXF1/CLDN18/VIPR1/HHIP/CD36/MMRN2/FGFR4/CLDN5/LRRC32/IL1RL1/OSCAR/CTHRC1/FGR/CHRDL1/MARCO/DLGAP5/AGTR2/PID1/PDK4/TGFBR2/C5AR1/LRRK2/DOK2/CAV2/ACKR1/ALOX5/DUOX1/LTBP4/CSF3/FERMT1/ATOH8/IL33/HBEGF/IL7R/CXCL2/MMP12/EDN1/CDH3/MMP1/COL1A1/GPRC5A/COL3A1/FOS/IGFBP3/PERP/CXCL13/SOX2/TP63	BP
cell surface receptor signaling pathway involved in cell-cell signaling	7/225	596/17910	0.624864	0.686839	0.494659	7	ADRB2/CTHRC1/LRRK2/FERMT1/CDH3/COL1A1/SOX2	BP
cell trailing edge	1/226	13/18675	0.146435	0.297615	0.218762	1	SPN	CC
cell volume homeostasis	2/225	23/17910	0.0334296	0.134721	0.0970259	2	AQP4/AQP1	BP
cell-cell adherens junction	3/226	79/18675	0.0708826	0.193631	0.142328	3	CDH5/NECTIN4/DSP	CC
cell-cell adhesion	22/225	771/17910	0.000296727	0.00445895	0.00321132	22	AGER/RGCC/FOXF1/CLDN18/PECAM1/SPN/CLDN5/LRRC32/CD93/ESAM/SELP/TGFBR2/VSIG4/SFTPD/DSP/IL7R/PERP/FOXA2/CXCL13/SOX2/DSG3/DSC3	BP
cell-cell adhesion mediated by cadherin	2/225	20/17910	0.0257285	0.11149	0.0802948	2	RGCC/FOXA2	BP
cell-cell adhesion mediated by integrin	1/225	16/17910	0.183202	0.310212	0.223414	1	CXCL13	BP
cell-cell adhesion mediator activity	1/213	33/16967	0.341172	0.514751	0.414033	1	DSP	MF
cell-cell adhesion via plasma-membrane adhesion molecules	8/225	233/17910	0.00941103	0.0545965	0.0393202	8	CLDN18/PECAM1/CLDN5/ESAM/SELP/TGFBR2/DSG3/DSC3	BP
cell-cell contact zone	3/226	70/18675	0.0530189	0.170535	0.125352	3	PECAM1/SLC2A1/DSP	CC
cell-cell junction	16/226	414/18675	4.71195e-05	0.000774645	0.000569402	16	TEK/CDH5/CLDN18/PECAM1/FGFR4/CLDN5/ESAM/SLC2A1/NECTIN4/DSP/GJB2/PERP/COL17A1/PKP1/DSG3/DSC3	CC
cell-cell junction assembly	3/225	98/17910	0.125781	0.257699	0.185594	3	CDH5/CLDN5/GJB2	BP
cell-cell junction organization	4/225	128/17910	0.0780052	0.200695	0.14454	4	CDH5/CLDN5/DSP/GJB2	BP
cell-cell signaling	27/225	1510/17910	0.0395445	0.141258	0.101733	27	TEK/AGER/ADRB2/RETN/CCL23/CACNA2D2/CTHRC1/AGTR2/KPNA2/LRRK2/SPP1/SLC2A1/LTBP4/FERMT1/SEMA3B/GJB2/EDN1/NRGN/CDH3/COL1A1/C1QA/FOXA2/CXCL13/CXCL14/NQO1/SOX2/TP63	BP
cell-cell signaling by wnt	6/225	500/17910	0.602395	0.669277	0.482011	6	CTHRC1/LRRK2/FERMT1/CDH3/COL1A1/SOX2	BP
cell-matrix adhesion	10/225	214/17910	0.000387307	0.00550299	0.00396324	10	TEK/ACVRL1/LYVE1/EMP2/PECAM1/CD36/FERMT1/MMP12/COL3A1/COL17A1	BP
cell-substrate adherens junction	8/226	399/18675	0.112516	0.256912	0.188843	8	TEK/FHL1/ARHGAP31/TNS1/HMGA1/CAV2/FERMT1/TNS4	CC
cell-substrate adherens junction assembly	2/225	81/17910	0.270751	0.391293	0.281808	2	TEK/ACVRL1	BP
cell-substrate adhesion	15/225	322/17910	1.45808e-05	0.000458964	0.000330544	15	TEK/ACVRL1/LYVE1/EMP2/FOXF1/PECAM1/SPOCK2/CD36/VWF/FERMT1/NDNF/MMP12/COL1A1/COL3A1/COL17A1	BP
cell-substrate junction	9/226	404/18675	0.0578864	0.177204	0.130254	9	TEK/FHL1/ARHGAP31/TNS1/HMGA1/CAV2/FERMT1/TNS4/COL17A1	CC
cell-substrate junction assembly	4/225	96/17910	0.0328865	0.134118	0.0965911	4	TEK/ACVRL1/TNS1/COL17A1	BP
cellular amide metabolic process	4/225	1051/17910	0.999338	1	0.720197	4	MGAT3/PDK4/GAPDH/KRT17	BP
cellular amine metabolic process	1/225	121/17910	0.784525	0.817728	0.588925	1	NQO1	BP
cellular amino acid biosynthetic process	3/225	73/17910	0.0641707	0.180482	0.129983	3	PYCR1/PSAT1/GPT2	BP
cellular amino acid catabolic process	1/225	115/17910	0.767427	0.802738	0.578129	1	GPT2	BP
cellular amino acid metabolic process	5/225	347/17910	0.442088	0.541375	0.389896	5	PYCR1/PSAT1/GPT2/SLC7A5/NQO1	BP
cellular calcium ion homeostasis	6/225	375/17910	0.332595	0.448639	0.323109	6	S1PR1/CCL23/CD36/CD52/EDN1/CXCL13	BP
cellular carbohydrate biosynthetic process	2/225	71/17910	0.224232	0.349702	0.251854	2	SLC2A1/B3GNT3	BP
cellular carbohydrate metabolic process	6/225	256/17910	0.104463	0.234674	0.169011	6	PDK4/SLC2A1/FBP1/B3GNT3/IGFBP3/FOXA2	BP
cellular catabolic process	30/225	2054/17910	0.215107	0.340682	0.245358	30	GPD1/LYVE1/ECSCR/FABP4/ADRB2/CD36/UBE2C/CCNB1/GPX3/LAMP3/OGN/MGAT3/AURKA/LPL/AURKB/HYAL1/CYP4B1/BUB1B/LRRK2/GAPDH/CDK1/DUOX1/GPT2/PBK/IL33/HSPB8/MMP12/FBP1/AKR1B10/PKP1	BP
cellular cation homeostasis	10/225	518/17910	0.118737	0.24699	0.177881	10	S1PR1/CCL23/CD36/SCARA5/AGTR2/LRRK2/CD52/C7/EDN1/CXCL13	BP
cellular chemical homeostasis	15/225	666/17910	0.0213459	0.0980586	0.0706215	15	AGER/S1PR1/CPB2/CCL23/CD36/NME1/SCARA5/AQP4/AGTR2/LRRK2/CD52/C7/EDN1/FOXA2/CXCL13	BP
cellular component assembly	51/225	2765/17910	0.00258018	0.0210643	0.0151705	51	TEK/ANKRD1/ACVRL1/RGCC/S1PR1/ADRB2/CDH5/EMP2/FGD5/SPOCK2/CD36/UBE2C/CCNB1/CLDN5/TNS1/SELP/TPX2/VWF/MYBL2/RRM2/SCARA5/GPX3/NEK2/AQP4/HMGA1/KIF4A/AURKA/AURKB/HYAL1/LRRK2/CDT1/CAV2/CDK1/CENPA/SLC2A1/COLEC12/ALOX5AP/CSF3/GJB2/EDN1/FBP1/MMP1/COL1A1/THBS2/MYH11/COL17A1/CXCL13/STEAP4/SERPINA1/PKP1/TP63	BP
cellular component assembly involved in morphogenesis	3/225	91/17910	0.106842	0.234674	0.169011	3	ANKRD1/EDN1/MYH11	BP
cellular component biogenesis	52/225	2951/17910	0.00598843	0.0389248	0.0280335	52	TEK/ANKRD1/LDB2/ACVRL1/RGCC/S1PR1/ADRB2/CDH5/EMP2/FGD5/SPOCK2/CD36/UBE2C/CCNB1/CLDN5/TNS1/SELP/TPX2/VWF/MYBL2/RRM2/SCARA5/GPX3/NEK2/AQP4/HMGA1/KIF4A/AURKA/AURKB/HYAL1/LRRK2/CDT1/CAV2/CDK1/CENPA/SLC2A1/COLEC12/ALOX5AP/CSF3/GJB2/EDN1/FBP1/MMP1/COL1A1/THBS2/MYH11/COL17A1/CXCL13/STEAP4/SERPINA1/PKP1/TP63	BP
cellular component disassembly	15/225	492/17910	0.00144807	0.0136872	0.00985749	15	ADRB2/TOP2A/FGFR4/CCNB1/CCNB2/HMGA1/A2M/CDK1/MMP11/MMP12/MMP1/C1QA/C1QB/MMP13/MMP10	BP
cellular component disassembly involved in execution phase of apoptosis	1/225	33/17910	0.341358	0.456344	0.328658	1	TOP2A	BP
cellular component morphogenesis	17/225	959/17910	0.0965344	0.224238	0.161495	17	TEK/ANKRD1/SEMA3G/FGD5/PECAM1/FGR/AURKA/PID1/LRRK2/DOK2/KLF2/SPP1/CRABP2/SEMA3B/IL7R/EDN1/MYH11	BP
cellular defense response	2/225	53/17910	0.14311	0.271253	0.195356	2	SPN/C5AR1	BP
cellular detoxification	7/225	107/17910	0.000404869	0.00566177	0.00407759	7	CD36/GPX3/ALOX5AP/DUOX1/GPX2/NQO1/AKR1B10	BP
cellular detoxification of aldehyde	1/225	6/17910	0.0730587	0.190736	0.137367	1	AKR1B10	BP
cellular developmental process	93/225	4088/17910	3.76908e-10	1.69705e-07	1.22221e-07	93	TEK/ANKRD1/VEGFD/GDF10/TMEM100/SEMA3G/AGER/ACVRL1/FHL1/ECSCR/RGCC/S1PR1/FABP4/ADRB2/CDH5/EMP2/FOXF1/CLDN18/FGD5/PECAM1/ADRB1/HHIP/SPOCK2/RETN/CD36/TOP2A/NME1/SPN/CCNB1/CLDN5/OSCAR/SLC46A2/CACNA2D2/CTHRC1/FGR/CHRDL1/HMGA1/MSR1/AURKA/LPL/AGTR2/PID1/TGFBR2/C5AR1/LRRK2/FOXM1/DOK2/KLF2/A2M/CAV2/CDK1/MYRF/SPP1/HMGB3/LTBP4/CSF3/ATOH8/MMP11/CRABP2/IL33/NDNF/SLC7A5/SEMA3B/DSP/IL7R/EDN1/NR4A1/CDH3/COL1A1/C…	BP
cellular divalent inorganic cation homeostasis	6/225	392/17910	0.37055	0.480983	0.346403	6	S1PR1/CCL23/CD36/CD52/EDN1/CXCL13	BP
cellular extravasation	4/225	59/17910	0.00643355	0.0412138	0.029682	4	AGER/PECAM1/SPN/SELP	BP
cellular glucose homeostasis	4/225	142/17910	0.104135	0.234674	0.169011	4	AGER/CPB2/NME1/FOXA2	BP
cellular homeostasis	18/225	814/17910	0.0145657	0.0762337	0.0549033	18	AGER/S1PR1/CPB2/CCL23/CD36/NME1/UBE2C/SCARA5/AQP4/AGTR2/LRRK2/CD52/AQP1/LARGE2/C7/EDN1/FOXA2/CXCL13	BP
cellular hormone metabolic process	4/225	117/17910	0.0601265	0.17431	0.125538	4	HSD17B6/SPP1/CRABP2/AKR1B10	BP
cellular hyperosmotic response	2/225	15/17910	0.0148141	0.0763613	0.0549952	2	SLC2A1/AQP1	BP
cellular ion homeostasis	10/225	531/17910	0.133174	0.26285	0.189304	10	S1PR1/CCL23/CD36/SCARA5/AGTR2/LRRK2/CD52/C7/EDN1/CXCL13	BP
cellular iron ion homeostasis	1/225	57/17910	0.5141	0.599581	0.431816	1	SCARA5	BP
cellular ketone metabolic process	5/225	241/17910	0.187214	0.316281	0.227784	5	GPD1/FGFR4/PDK4/NQO1/AKR1B10	BP
cellular lipid catabolic process	3/225	189/17910	0.424707	0.527517	0.379916	3	FABP4/LPL/AKR1B10	BP
cellular lipid metabolic process	14/225	991/17910	0.364514	0.475515	0.342464	14	GPD1/TEK/FABP4/CD36/FGR/LPL/PDK4/ALOX5AP/ALOX5/CRABP2/EDN1/ALOX15B/SFTPB/AKR1B10	BP
cellular localization	33/225	2548/17910	0.453732	0.552141	0.39765	33	AGER/ADRB2/EMP2/FOXF1/CLDN18/CD36/CCNB1/NUSAP1/NEK2/FGR/HMGA1/KIF4A/MGAT3/DLGAP5/AURKA/AGTR2/KPNA2/AURKB/PID1/BUB1B/LRRK2/CDT1/CAV2/CDK1/CENPA/FERMT1/MMP12/CDH3/COL1A1/FOXA2/SFN/SERPINA1/TP63	BP
cellular macromolecule biosynthetic process	57/225	4634/17910	0.599307	0.666181	0.479781	57	ANKRD1/TMEM100/AGER/ACVRL1/RGCC/S1PR1/FABP4/ADRB2/FOXF1/CD36/TOP2A/FGFR4/CCNB1/MYBL2/RRM2/NEK2/CHRDL1/HMGA1/MGAT3/DLGAP5/CCNA2/RECQL4/AGTR2/AURKB/CDC6/PID1/C5AR1/CDT1/FOXM1/KLF2/GAPDH/CDK1/MYRF/SPP1/CDCA7/ANXA3/CSF3/FOSB/ETV4/ATOH8/CRABP2/IL33/HBEGF/LARGE2/DUSP1/MMP12/EDN1/FBP1/NR4A1/COL1A1/B3GNT3/FOS/FOXA2/PRAME/KRT17/SOX2/TP63	BP
cellular macromolecule catabolic process	14/225	1003/17910	0.381493	0.49056	0.353299	14	ECSCR/UBE2C/CCNB1/LAMP3/MGAT3/AURKA/AURKB/BUB1B/LRRK2/CDK1/PBK/IL33/MMP12/PKP1	BP
cellular macromolecule localization	20/225	1550/17910	0.484504	0.575048	0.414148	20	AGER/EMP2/CLDN18/CD36/MGAT3/AURKA/AGTR2/KPNA2/AURKB/PID1/BUB1B/LRRK2/CDT1/CDK1/CENPA/FERMT1/MMP12/COL1A1/SFN/TP63	BP
cellular metal ion homeostasis	9/225	467/17910	0.135184	0.265164	0.19097	9	S1PR1/CCL23/CD36/SCARA5/AGTR2/CD52/C7/EDN1/CXCL13	BP
cellular modified amino acid metabolic process	1/225	179/17910	0.897139	0.910698	0.655882	1	DUOX1	BP
cellular monovalent inorganic cation homeostasis	3/225	80/17910	0.0796442	0.202711	0.145992	3	AGTR2/LRRK2/C7	BP
cellular nitrogen compound biosynthetic process	58/225	4735/17910	0.614556	0.679045	0.489046	58	GPD1/ANKRD1/TMEM100/AGER/ACVRL1/RGCC/S1PR1/NPR1/FABP4/ADRB2/FOXF1/CD36/TOP2A/NME1/FGFR4/CCNB1/MYBL2/RRM2/NEK2/CHRDL1/HMGA1/DLGAP5/CCNA2/AGTR2/AURKB/CDC6/PID1/PDK4/C5AR1/CDT1/FOXM1/KLF2/GAPDH/CDK1/MYRF/SPP1/PSAT1/CDCA7/ANXA3/CSF3/FOSB/ETV4/ATOH8/CRABP2/IL33/DUSP1/MMP12/EDN1/FBP1/NR4A1/COL1A1/FOS/FOXA2/PRAME/NQO1/KRT17/SOX2/TP63	BP
cellular nitrogen compound catabolic process	4/225	642/17910	0.962778	0.968459	0.697481	4	GPD1/GAPDH/FBP1/PKP1	BP
cellular oxidant detoxification	6/225	99/17910	0.00155994	0.0143469	0.0103326	6	CD36/GPX3/ALOX5AP/DUOX1/GPX2/NQO1	BP
cellular pigmentation	1/225	47/17910	0.448416	0.546557	0.393629	1	CDH3	BP
cellular polysaccharide biosynthetic process	1/225	59/17910	0.526271	0.610243	0.439495	1	B3GNT3	BP
cellular polysaccharide metabolic process	1/225	88/17910	0.67217	0.723945	0.521382	1	B3GNT3	BP
cellular potassium ion transport	2/225	140/17910	0.527138	0.610609	0.439759	2	FHL1/AQP1	BP
cellular process involved in reproduction in multicellular organism	5/225	326/17910	0.39007	0.497892	0.35858	5	RETN/TOP2A/CCNB1/AURKA/NCAPH	BP
cellular protein catabolic process	12/225	648/17910	0.116948	0.24699	0.177881	12	ECSCR/UBE2C/CCNB1/LAMP3/MGAT3/AURKA/AURKB/BUB1B/LRRK2/CDK1/PBK/IL33	BP
cellular protein localization	20/225	1543/17910	0.476103	0.567814	0.408938	20	AGER/EMP2/CLDN18/CD36/MGAT3/AURKA/AGTR2/KPNA2/AURKB/PID1/BUB1B/LRRK2/CDT1/CDK1/CENPA/FERMT1/MMP12/COL1A1/SFN/TP63	BP
cellular protein metabolic process	80/225	4871/17910	0.00349436	0.0266618	0.0192018	80	TEK/GDF10/AGER/ACVRL1/ECSCR/PTPN21/RGCC/NPR1/FABP4/ADRB2/SH2D3C/EMP2/PECAM1/SPOCK2/CPB2/UBE2T/CD36/PPP1R14B/UBE2C/FGFR4/CCNB1/TPX2/SFTPC/NEK2/CCNB2/FGR/LAMP3/CHRDL1/MARCO/MGAT3/DLGAP5/AURKA/CCNA2/AGTR2/AURKB/CDC6/PID1/PDK4/TGFBR2/C5AR1/BUB1B/LRRK2/FOXM1/VSIG4/A2M/GAPDH/CAV2/CDK1/SPP1/CDKN3/CSF3/PBK/IL33/NDNF/AQP1/HSPB8/HBEGF/LARGE2/DUSP1/SFTPD/DSP/SFTPA1/PROM2/EDN1/MMP1/B3GNT3/GPRC5A/COL3A1/IGFBP…	BP
cellular protein modification process	63/225	3851/17910	0.0122434	0.066028	0.0475532	63	TEK/GDF10/AGER/ACVRL1/PTPN21/RGCC/NPR1/FABP4/ADRB2/SH2D3C/EMP2/PECAM1/SPOCK2/UBE2T/CD36/PPP1R14B/UBE2C/FGFR4/CCNB1/TPX2/NEK2/CCNB2/FGR/CHRDL1/MARCO/MGAT3/DLGAP5/AURKA/CCNA2/AGTR2/AURKB/CDC6/PID1/PDK4/TGFBR2/C5AR1/BUB1B/LRRK2/FOXM1/GAPDH/CAV2/CDK1/SPP1/CDKN3/CSF3/PBK/IL33/NDNF/HSPB8/HBEGF/LARGE2/DUSP1/DSP/PROM2/EDN1/B3GNT3/GPRC5A/COL3A1/IGFBP3/SFN/SERPINA1/SOX2/PI3	BP
cellular protein-containing complex assembly	7/225	952/17910	0.958173	0.965798	0.695564	7	ADRB2/CD36/UBE2C/CDT1/CENPA/CSF3/MYH11	BP
cellular respiration	3/225	176/17910	0.380867	0.49056	0.353299	3	GPD1/CCNB1/CDK1	BP
cellular response to abiotic stimulus	7/225	310/17910	0.0968365	0.2244	0.161612	7	ANKRD1/AURKB/HYAL1/SLC2A1/PBK/AQP1/COL1A1	BP
cellular response to acid chemical	10/225	199/17910	0.00021679	0.00339587	0.00244569	10	NME1/CCNB1/LPL/PID1/PDK4/KLF2/AQP1/EDN1/COL1A1/COL3A1	BP
cellular response to alcohol	1/225	88/17910	0.67217	0.723945	0.521382	1	KLF2	BP
cellular response to aldehyde	1/225	8/17910	0.0962107	0.224003	0.161326	1	AKR1B10	BP
cellular response to alkaloid	1/225	35/17910	0.357833	0.470007	0.338498	1	CCNA2	BP
cellular response to amino acid stimulus	2/225	64/17910	0.192065	0.321584	0.231604	2	COL1A1/COL3A1	BP
cellular response to ammonium ion	2/225	65/17910	0.196625	0.325239	0.234236	2	CCNA2/LRRK2	BP
cellular response to amyloid-beta	3/225	43/17910	0.0166916	0.0830775	0.0598321	3	AGER/ADRB2/CD36	BP
cellular response to angiotensin	2/225	25/17910	0.0389988	0.139872	0.100735	2	AGTR2/CDC6	BP
cellular response to antibiotic	6/225	147/17910	0.0107369	0.060097	0.0432817	6	PYCR1/LRRK2/KLF2/CDK1/AQP1/NQO1	BP
cellular response to bacterial lipopeptide	1/225	6/17910	0.0730587	0.190736	0.137367	1	CD36	BP
cellular response to bacterial lipoprotein	1/225	6/17910	0.0730587	0.190736	0.137367	1	CD36	BP
cellular response to biotic stimulus	4/225	206/17910	0.260266	0.383102	0.275909	4	ANKRD1/CD36/MRC1/CSF3	BP
cellular response to BMP stimulus	3/225	147/17910	0.281471	0.402244	0.289695	3	TMEM100/ACVRL1/CHRDL1	BP
cellular response to cadmium ion	1/225	32/17910	0.332963	0.448639	0.323109	1	FOS	BP
cellular response to calcium ion	4/225	63/17910	0.00809976	0.0487857	0.0351353	4	ALOX5AP/FOSB/EDN1/FOS	BP
cellular response to cAMP	2/225	52/17910	0.138801	0.268154	0.193124	2	GPD1/AQP1	BP
cellular response to carbohydrate stimulus	5/225	139/17910	0.0311026	0.128139	0.0922853	5	AGER/CPB2/NME1/COLEC12/FOXA2	BP
cellular response to catecholamine stimulus	1/225	34/17910	0.349647	0.462959	0.333421	1	LRRK2	BP
cellular response to chemical stimulus	87/225	3100/17910	1.77198e-14	7.8552e-11	5.65729e-11	87	GPD1/ANKRD1/VEGFD/GDF10/TMEM100/AGER/ACVRL1/RGCC/S1PR1/FABP4/ADRB2/CDH5/FOXF1/CLDN18/HHIP/SPOCK2/CPB2/CCL23/PYCR1/CD36/AOC3/MMRN2/NME1/FGFR4/CCNB1/CLDN5/LRRC32/IL1RL1/MYBL2/GPX3/AQP4/CHRDL1/MGAT3/LPL/CCNA2/MRC1/AGTR2/HYAL1/CDC6/PID1/PDK4/TGFBR2/C5AR1/LRRK2/MT1M/KLF2/GAPDH/CAV2/CDK1/SPP1/COLEC12/ALOX5AP/ACKR1/ALOX5/DUOX1/LTBP4/CSF3/FOSB/FERMT1/IL33/NDNF/AQP1/HSPB8/SEMA3B/HBEGF/DUSP1/SFTPD/IL7R/CXC…	BP
cellular response to chemokine	3/225	60/17910	0.039674	0.141265	0.101738	3	ACKR1/DUSP1/EDN1	BP
cellular response to cocaine	1/225	3/17910	0.037219	0.135873	0.0978554	1	CCNA2	BP
cellular response to copper ion	1/225	17/17910	0.193473	0.321584	0.231604	1	AQP1	BP
cellular response to corticosteroid stimulus	4/225	58/17910	0.0060559	0.0392482	0.0282665	4	AGTR2/AQP1/GJB2/EDN1	BP
cellular response to corticotropin-releasing hormone stimulus	1/225	5/17910	0.0612622	0.17431	0.125538	1	NR4A1	BP
cellular response to cycloheximide	1/225	3/17910	0.037219	0.135873	0.0978554	1	KLF2	BP
cellular response to cytokine stimulus	30/225	1084/17910	3.94165e-05	0.000939427	0.000676572	30	GPD1/ANKRD1/S1PR1/FABP4/FOXF1/CLDN18/SPOCK2/CD36/IL1RL1/MYBL2/AQP4/MRC1/HYAL1/PID1/KLF2/GAPDH/ACKR1/ALOX5/DUOX1/CSF3/IL33/DUSP1/IL7R/CXCL2/MMP12/EDN1/MMP1/COL1A1/FOS/SOX2	BP
cellular response to decreased oxygen levels	7/225	220/17910	0.0214158	0.0981234	0.0706682	7	ANKRD1/RGCC/CCNB1/CCNA2/NDNF/AQP1/EDN1	BP
cellular response to dexamethasone stimulus	3/225	29/17910	0.00561815	0.0370158	0.0266587	3	AGTR2/AQP1/GJB2	BP
cellular response to diacyl bacterial lipopeptide	1/225	4/17910	0.0493163	0.156268	0.112544	1	CD36	BP
cellular response to DNA damage stimulus	10/225	791/17910	0.537586	0.618984	0.44579	10	ANKRD1/RGCC/UBE2T/TOP2A/CCNB1/AURKA/FOXM1/CDK1/SFN/TP63	BP
cellular response to dopamine	1/225	14/17910	0.162269	0.289472	0.208477	1	LRRK2	BP
cellular response to drug	12/225	362/17910	0.00216057	0.0185977	0.013394	12	PYCR1/NME1/CCNA2/AGTR2/LRRK2/KLF2/CDK1/AQP1/GJB2/EDN1/FBP1/NQO1	BP
cellular response to dsRNA	1/225	22/17910	0.242928	0.364187	0.262286	1	COLEC12	BP
cellular response to endogenous stimulus	39/225	1305/17910	3.42386e-07	2.86208e-05	2.06126e-05	39	GPD1/ANKRD1/GDF10/TMEM100/AGER/ACVRL1/ADRB2/CDH5/HHIP/CD36/FGFR4/CLDN5/LRRC32/CHRDL1/LPL/CCNA2/AGTR2/HYAL1/CDC6/PID1/PDK4/TGFBR2/LRRK2/KLF2/CAV2/SPP1/LTBP4/FOSB/FERMT1/AQP1/DUSP1/GJB2/EDN1/NR4A1/COL1A1/COL3A1/FOS/CXCL13/TP63	BP
cellular response to environmental stimulus	7/225	310/17910	0.0968365	0.2244	0.161612	7	ANKRD1/AURKB/HYAL1/SLC2A1/PBK/AQP1/COL1A1	BP
cellular response to epidermal growth factor stimulus	1/225	43/17910	0.419732	0.522661	0.376419	1	COL1A1	BP
cellular response to estradiol stimulus	1/225	34/17910	0.349647	0.462959	0.333421	1	CCNA2	BP
cellular response to exogenous dsRNA	1/225	17/17910	0.193473	0.321584	0.231604	1	COLEC12	BP
cellular response to external stimulus	9/225	320/17910	0.0201549	0.0943473	0.0679486	9	ANKRD1/LPL/PDK4/LRRK2/SLC2A1/AQP1/COL1A1/FOS/FOXA2	BP
cellular response to extracellular stimulus	7/225	251/17910	0.0396351	0.141265	0.101738	7	LPL/PDK4/LRRK2/SLC2A1/COL1A1/FOS/FOXA2	BP
cellular response to fatty acid	6/225	56/17910	7.06805e-05	0.0014439	0.00103989	6	NME1/CCNB1/LPL/PID1/PDK4/EDN1	BP
cellular response to fibroblast growth factor stimulus	6/225	138/17910	0.00800405	0.0485692	0.0349794	6	HHIP/FGFR4/HYAL1/NR4A1/COL1A1/CXCL13	BP
cellular response to fluid shear stress	1/225	21/17910	0.233285	0.357186	0.257244	1	KLF2	BP
cellular response to glucagon stimulus	1/225	26/17910	0.280309	0.400971	0.288778	1	GJB2	BP
cellular response to glucocorticoid stimulus	4/225	54/17910	0.00469304	0.0325575	0.0234478	4	AGTR2/AQP1/GJB2/EDN1	BP
cellular response to glucose starvation	1/225	38/17910	0.38178	0.49056	0.353299	1	SLC2A1	BP
cellular response to glucose stimulus	4/225	128/17910	0.0780052	0.200695	0.14454	4	AGER/CPB2/NME1/FOXA2	BP
cellular response to gonadotropin stimulus	1/225	18/17910	0.203614	0.330995	0.238381	1	CCNA2	BP
cellular response to growth factor stimulus	24/225	674/17910	4.50088e-06	0.000186471	0.000134296	24	ANKRD1/GDF10/TMEM100/ACVRL1/CDH5/HHIP/MMRN2/FGFR4/CLDN5/LRRC32/CHRDL1/CCNA2/AGTR2/HYAL1/TGFBR2/CAV2/LTBP4/FERMT1/EDN1/NR4A1/COL1A1/COL3A1/FOS/CXCL13	BP
cellular response to heat	2/225	117/17910	0.433546	0.53444	0.384902	2	SCARA5/HSPB8	BP
cellular response to hexose stimulus	4/225	130/17910	0.0815124	0.206666	0.14884	4	AGER/CPB2/NME1/FOXA2	BP
cellular response to hormone stimulus	16/225	646/17910	0.00773225	0.047541	0.0342389	16	LPL/CCNA2/AGTR2/CDC6/PID1/PDK4/CAV2/SPP1/FOSB/AQP1/DUSP1/GJB2/EDN1/NR4A1/FOS/TP63	BP
cellular response to hydrogen peroxide	6/225	99/17910	0.00155994	0.0143469	0.0103326	6	PYCR1/LRRK2/KLF2/CDK1/AQP1/NQO1	BP
cellular response to hydroperoxide	1/225	8/17910	0.0962107	0.224003	0.161326	1	CD36	BP
cellular response to hypoxia	7/225	210/17910	0.0170697	0.0840775	0.0605524	7	ANKRD1/RGCC/CCNB1/CCNA2/NDNF/AQP1/EDN1	BP
cellular response to inorganic substance	12/225	194/17910	6.48817e-06	0.000247949	0.000178572	12	FABP4/CCNB1/CCNA2/LRRK2/MT1M/ALOX5AP/FOSB/AQP1/EDN1/FBP1/FOS/NQO1	BP
cellular response to insulin stimulus	4/225	197/17910	0.235716	0.3597	0.259055	4	LPL/PID1/PDK4/CAV2	BP
cellular response to insulin-like growth factor stimulus	1/225	9/17910	0.10757	0.234674	0.169011	1	CCNA2	BP
cellular response to interferon-gamma	4/225	153/17910	0.127105	0.257699	0.185594	4	AQP4/MRC1/GAPDH/EDN1	BP
cellular response to interleukin-1	4/225	156/17910	0.133712	0.263794	0.189984	4	ANKRD1/HYAL1/KLF2/EDN1	BP
cellular response to interleukin-18	1/225	8/17910	0.0962107	0.224003	0.161326	1	ALOX5	BP
cellular response to interleukin-4	1/225	33/17910	0.341358	0.456344	0.328658	1	MRC1	BP
cellular response to interleukin-6	1/225	46/17910	0.44138	0.540807	0.389487	1	PID1	BP
cellular response to interleukin-7	1/225	41/17910	0.404838	0.510278	0.3675	1	IL7R	BP
cellular response to iron ion	1/225	10/17910	0.118787	0.24699	0.177881	1	CCNB1	BP
cellular response to ketone	5/225	91/17910	0.00580409	0.0378376	0.0272505	5	AGTR2/KLF2/SPP1/AQP1/GJB2	BP
cellular response to laminar fluid shear stress	1/225	8/17910	0.0962107	0.224003	0.161326	1	KLF2	BP
cellular response to leptin stimulus	2/225	18/17910	0.0210606	0.0972184	0.0700163	2	CCNA2/PID1	BP
cellular response to leukemia inhibitory factor	2/225	94/17910	0.331033	0.448219	0.322806	2	SPOCK2/MYBL2	BP
cellular response to light stimulus	4/225	113/17910	0.0542319	0.167388	0.120552	4	AURKB/HYAL1/PBK/AQP1	BP
cellular response to lipid	18/225	575/17910	0.000361819	0.00527612	0.00379985	18	ANKRD1/CD36/NME1/CCNB1/LPL/CCNA2/MRC1/AGTR2/PID1/PDK4/SPP1/CSF3/AQP1/GJB2/EDN1/NR4A1/COL1A1/TP63	BP
cellular response to lipopolysaccharide	4/225	176/17910	0.181048	0.310212	0.223414	4	ANKRD1/CD36/MRC1/CSF3	BP
cellular response to lipoprotein particle stimulus	2/225	35/17910	0.0713301	0.190736	0.137367	2	CD36/LPL	BP
cellular response to lipoteichoic acid	1/225	10/17910	0.118787	0.24699	0.177881	1	CD36	BP
cellular response to lithium ion	1/225	13/17910	0.151603	0.27901	0.200942	1	FABP4	BP
cellular response to low-density lipoprotein particle stimulus	2/225	23/17910	0.0334296	0.134721	0.0970259	2	CD36/LPL	BP
cellular response to luteinizing hormone stimulus	1/225	3/17910	0.037219	0.135873	0.0978554	1	CCNA2	BP
cellular response to magnesium ion	1/225	7/17910	0.0847076	0.207349	0.149332	1	FBP1	BP
cellular response to manganese ion	1/225	13/17910	0.151603	0.27901	0.200942	1	LRRK2	BP
cellular response to mechanical stimulus	4/225	77/17910	0.0160738	0.0814347	0.058649	4	ANKRD1/SLC2A1/AQP1/COL1A1	BP
cellular response to mercury ion	1/225	3/17910	0.037219	0.135873	0.0978554	1	AQP1	BP
cellular response to metal ion	11/225	167/17910	8.73675e-06	0.00031377	0.000225976	11	FABP4/CCNB1/LRRK2/MT1M/ALOX5AP/FOSB/AQP1/EDN1/FBP1/FOS/NQO1	BP
cellular response to mineralocorticoid stimulus	1/225	7/17910	0.0847076	0.207349	0.149332	1	EDN1	BP
cellular response to molecule of bacterial origin	4/225	183/17910	0.198791	0.328331	0.236463	4	ANKRD1/CD36/MRC1/CSF3	BP
cellular response to monoamine stimulus	1/225	34/17910	0.349647	0.462959	0.333421	1	LRRK2	BP
cellular response to monosaccharide stimulus	4/225	131/17910	0.0832949	0.207349	0.149332	4	AGER/CPB2/NME1/FOXA2	BP
cellular response to nitric oxide	2/225	16/17910	0.0167917	0.0830775	0.0598321	2	CCNA2/AQP1	BP
cellular response to nitrogen compound	20/225	620/17910	0.000114205	0.00205801	0.00148217	20	GPD1/AGER/ADRB2/CD36/LPL/CCNA2/AGTR2/CDC6/PID1/PDK4/LRRK2/KLF2/CAV2/COLEC12/AQP1/GJB2/EDN1/NR4A1/COL1A1/COL3A1	BP
cellular response to nutrient	3/225	71/17910	0.0600331	0.17431	0.125538	3	LPL/COL1A1/FOXA2	BP
cellular response to nutrient levels	6/225	220/17910	0.059637	0.17431	0.125538	6	LPL/PDK4/LRRK2/SLC2A1/COL1A1/FOXA2	BP
cellular response to organic cyclic compound	17/225	532/17910	0.000417422	0.00576458	0.00415163	17	GPD1/ANKRD1/FOXF1/CCNB1/CCNA2/AGTR2/LRRK2/KLF2/SPP1/COLEC12/AQP1/GJB2/EDN1/NR4A1/COL1A1/ALPL/TP63	BP
cellular response to organic substance	67/225	2564/17910	1.57698e-09	3.67934e-07	2.64985e-07	67	GPD1/ANKRD1/GDF10/TMEM100/AGER/ACVRL1/S1PR1/FABP4/ADRB2/CDH5/FOXF1/CLDN18/HHIP/SPOCK2/CPB2/CD36/MMRN2/NME1/FGFR4/CCNB1/CLDN5/LRRC32/IL1RL1/MYBL2/AQP4/CHRDL1/LPL/CCNA2/MRC1/AGTR2/HYAL1/CDC6/PID1/PDK4/TGFBR2/LRRK2/KLF2/GAPDH/CAV2/SPP1/COLEC12/ACKR1/ALOX5/DUOX1/LTBP4/CSF3/FOSB/FERMT1/IL33/AQP1/HSPB8/DUSP1/IL7R/CXCL2/MMP12/GJB2/EDN1/NR4A1/MMP1/COL1A1/ALPL/COL3A1/FOS/FOXA2/CXCL13/SOX2/TP63	BP
cellular response to organonitrogen compound	19/225	559/17910	8.63329e-05	0.00169342	0.0012196	19	GPD1/AGER/ADRB2/CD36/LPL/CCNA2/AGTR2/CDC6/PID1/PDK4/LRRK2/KLF2/CAV2/AQP1/GJB2/EDN1/NR4A1/COL1A1/COL3A1	BP
cellular response to osmotic stress	2/225	40/17910	0.0898271	0.217479	0.156627	2	SLC2A1/AQP1	BP
cellular response to oxidative stress	13/225	296/17910	9.91629e-05	0.00185481	0.00133582	13	PYCR1/CD36/GPX3/MGAT3/CCNA2/LRRK2/KLF2/CDK1/AQP1/GJB2/FOS/GPX2/NQO1	BP
cellular response to oxidised low-density lipoprotein particle stimulus	1/225	11/17910	0.129864	0.257699	0.185594	1	CD36	BP
cellular response to oxygen levels	7/225	237/17910	0.0304718	0.127254	0.091648	7	ANKRD1/RGCC/CCNB1/CCNA2/NDNF/AQP1/EDN1	BP
cellular response to oxygen radical	2/225	24/17910	0.0361724	0.135873	0.0978554	2	CD36/NQO1	BP
cellular response to oxygen-containing compound	33/225	1068/17910	1.51697e-06	8.40593e-05	6.05392e-05	33	GPD1/ANKRD1/AGER/ADRB2/CPB2/PYCR1/CD36/NME1/CCNB1/LPL/CCNA2/MRC1/AGTR2/CDC6/PID1/PDK4/LRRK2/KLF2/CAV2/CDK1/SPP1/COLEC12/CSF3/AQP1/GJB2/EDN1/NR4A1/COL1A1/COL3A1/FOS/FOXA2/NQO1/AKR1B10	BP
cellular response to peptide	14/225	364/17910	0.000216425	0.00339587	0.00244569	14	AGER/ADRB2/CD36/LPL/CCNA2/AGTR2/CDC6/PID1/PDK4/KLF2/CAV2/GJB2/EDN1/NR4A1	BP
cellular response to peptide hormone stimulus	10/225	297/17910	0.00444845	0.0314013	0.0226151	10	LPL/CCNA2/AGTR2/CDC6/PID1/PDK4/CAV2/GJB2/EDN1/NR4A1	BP
cellular response to pH	1/225	22/17910	0.242928	0.364187	0.262286	1	HYAL1	BP
cellular response to platelet-derived growth factor stimulus	2/225	21/17910	0.028205	0.119534	0.0860881	2	CCNA2/HYAL1	BP
cellular response to radiation	4/225	173/17910	0.173615	0.301741	0.217313	4	AURKB/HYAL1/PBK/AQP1	BP
cellular response to reactive nitrogen species	2/225	19/17910	0.0233461	0.103909	0.0748348	2	CCNA2/AQP1	BP
cellular response to reactive oxygen species	9/225	165/17910	0.000244233	0.00374632	0.00269809	9	PYCR1/CD36/CCNA2/LRRK2/KLF2/CDK1/AQP1/FOS/NQO1	BP
cellular response to retinoic acid	2/225	65/17910	0.196625	0.325239	0.234236	2	AQP1/COL1A1	BP
cellular response to salt stress	1/225	12/17910	0.140802	0.268154	0.193124	1	AQP1	BP
cellular response to starvation	3/225	136/17910	0.244231	0.365892	0.263514	3	PDK4/LRRK2/SLC2A1	BP
cellular response to steroid hormone stimulus	6/225	242/17910	0.0853581	0.208596	0.15023	6	AGTR2/AQP1/GJB2/EDN1/NR4A1/TP63	BP
cellular response to stress	34/225	1914/17910	0.0239344	0.106101	0.0764137	34	ANKRD1/AGER/RGCC/SH2D3C/UBE2T/PYCR1/CD36/TOP2A/CCNB1/SCARA5/GPX3/HMGA1/MGAT3/AURKA/CCNA2/PDK4/LRRK2/FOXM1/KLF2/CDK1/SPP1/SLC2A1/PBK/NDNF/AQP1/HSPB8/DUSP1/GJB2/EDN1/FOS/SFN/GPX2/NQO1/TP63	BP
cellular response to superoxide	2/225	24/17910	0.0361724	0.135873	0.0978554	2	CD36/NQO1	BP
cellular response to testosterone stimulus	1/225	9/17910	0.10757	0.234674	0.169011	1	SPP1	BP
cellular response to topologically incorrect protein	1/225	135/17910	0.819709	0.847032	0.61003	1	HSPB8	BP
cellular response to toxic substance	12/225	241/17910	5.6021e-05	0.00121142	0.000872461	12	PYCR1/CD36/GPX3/LRRK2/KLF2/CDK1/ALOX5AP/DUOX1/AQP1/GPX2/NQO1/AKR1B10	BP
cellular response to transforming growth factor beta stimulus	14/225	233/17910	1.54045e-06	8.43062e-05	6.07171e-05	14	ANKRD1/GDF10/ACVRL1/CDH5/CLDN5/LRRC32/TGFBR2/CAV2/LTBP4/FERMT1/EDN1/COL1A1/COL3A1/FOS	BP
cellular response to tumor necrosis factor	9/225	266/17910	0.00662078	0.0419884	0.0302399	9	GPD1/ANKRD1/FABP4/CLDN18/HYAL1/PID1/KLF2/EDN1/COL1A1	BP
cellular response to type I interferon	1/225	91/17910	0.684431	0.734111	0.528704	1	MMP12	BP
cellular response to unfolded protein	1/225	123/17910	0.789941	0.822214	0.592156	1	HSPB8	BP
cellular response to UV	4/225	77/17910	0.0160738	0.0814347	0.058649	4	AURKB/HYAL1/PBK/AQP1	BP
cellular response to UV-B	1/225	8/17910	0.0962107	0.224003	0.161326	1	HYAL1	BP
cellular response to vascular endothelial growth factor stimulus	1/225	65/17910	0.560992	0.637824	0.459359	1	NR4A1	BP
cellular response to vasopressin	1/225	3/17910	0.037219	0.135873	0.0978554	1	CDC6	BP
cellular response to virus	1/225	55/17910	0.501618	0.588585	0.423897	1	MMP12	BP
cellular response to vitamin	1/225	32/17910	0.332963	0.448639	0.323109	1	COL1A1	BP
cellular response to xenobiotic stimulus	6/225	164/17910	0.0175953	0.0859031	0.0618671	6	AOC3/CCNA2/AGTR2/AQP1/GJB2/NQO1	BP
cellular response to zinc ion	1/225	19/17910	0.213629	0.338705	0.243934	1	MT1M	BP
cellular senescence	1/225	77/17910	0.623015	0.684976	0.493317	1	HMGA1	BP
cellular sodium ion homeostasis	2/225	13/17910	0.0111876	0.0613793	0.0442052	2	AGTR2/C7	BP
cellular stress response to acid chemical	1/225	3/17910	0.037219	0.135873	0.0978554	1	KLF2	BP
cellular transition metal ion homeostasis	1/225	83/17910	0.650672	0.708531	0.510281	1	SCARA5	BP
cellular water homeostasis	1/225	4/17910	0.0493163	0.156268	0.112544	1	AQP4	BP
CENP-A containing chromatin organization	1/225	42/17910	0.412332	0.516639	0.372081	1	CENPA	BP
CENP-A containing nucleosome assembly	1/225	42/17910	0.412332	0.516639	0.372081	1	CENPA	BP
central nervous system development	15/225	935/17910	0.198946	0.328464	0.236559	15	AGER/S1PR1/NME1/AGTR2/TGFBR2/C5AR1/LRRK2/MYRF/SLC2A1/ANXA3/AQP1/NRGN/C1QA/COL3A1/SOX2	BP
central nervous system myelin maintenance	1/225	6/17910	0.0730587	0.190736	0.137367	1	MYRF	BP
central nervous system myelination	1/225	21/17910	0.233285	0.357186	0.257244	1	MYRF	BP
centriole	3/226	124/18675	0.190107	0.351955	0.258704	3	TOP2A/CEP55/AURKA	CC
centriole-centriole cohesion	1/225	12/17910	0.140802	0.268154	0.193124	1	NEK2	BP
centromere complex assembly	1/225	54/17910	0.495258	0.583438	0.42019	1	CENPA	BP
centrosome	9/226	473/18675	0.121582	0.270109	0.198543	9	RGCC/NME1/CCNB1/CEP55/NEK2/CCNB2/DLGAP5/AURKA/CDK1	CC
centrosome cycle	3/225	112/17910	0.166826	0.296885	0.213816	3	NEK2/AURKA/CDK1	BP
centrosome localization	1/225	24/17910	0.261854	0.383102	0.275909	1	AURKA	BP
centrosome separation	2/225	12/17910	0.00954484	0.0545965	0.0393202	2	NEK2/AURKA	BP
cerebellar cortex development	1/225	46/17910	0.44138	0.540807	0.389487	1	AGTR2	BP
cerebellum development	1/225	98/17910	0.711293	0.754706	0.543537	1	AGTR2	BP
cerebral cortex development	2/225	112/17910	0.411908	0.516639	0.372081	2	SLC2A1/COL3A1	BP
cerebrospinal fluid secretion	1/225	3/17910	0.037219	0.135873	0.0978554	1	AQP1	BP
cGMP biosynthetic process	1/225	8/17910	0.0962107	0.224003	0.161326	1	NPR1	BP
cGMP metabolic process	1/225	14/17910	0.162269	0.289472	0.208477	1	NPR1	BP
cGMP-mediated signaling	3/225	26/17910	0.00410955	0.029914	0.021544	3	NPR1/CD36/AQP1	BP
channel activity	5/213	370/16967	0.497228	0.634176	0.510091	5	SCN7A/AQP4/AQP1/GJB2/CLCA2	MF
channel regulator activity	1/213	127/16967	0.800202	0.869533	0.699397	1	ADRB2	MF
chaperone binding	1/213	91/16967	0.684218	0.790594	0.635904	1	VWF	MF
chaperone complex	1/226	19/18675	0.206616	0.370826	0.272575	1	HSPB8	CC
chemical homeostasis	27/225	1015/17910	0.000189068	0.00311576	0.00224396	27	AGER/FHL1/S1PR1/NPR1/FABP4/CPB2/CCL23/SCN7A/CD36/NME1/FGFR4/SCARA5/AQP4/LPL/AGTR2/PDK4/LRRK2/CD52/AQP1/C7/SFTPD/EDN1/FOXA2/SFN/CXCL13/STEAP4/TP63	BP
chemical homeostasis within a tissue	1/225	11/17910	0.129864	0.257699	0.185594	1	SFTPD	BP
chemical synaptic transmission	8/225	591/17910	0.465707	0.560239	0.403482	8	AGER/ADRB2/RETN/CACNA2D2/LRRK2/EDN1/NRGN/NQO1	BP
chemical synaptic transmission, postsynaptic	2/225	103/17910	0.371986	0.48245	0.347459	2	ADRB2/LRRK2	BP
chemoattractant activity	1/213	29/16967	0.306961	0.485014	0.390115	1	VEGFD	MF
chemokine (C-C motif) ligand 2 secretion	1/225	8/17910	0.0962107	0.224003	0.161326	1	LPL	BP
chemokine (C-X-C motif) ligand 2 production	1/225	14/17910	0.162269	0.289472	0.208477	1	LPL	BP
chemokine activity	3/213	30/16967	0.00616952	0.075797	0.0609663	3	CCL23/CXCL13/CXCL14	MF
chemokine binding	2/213	23/16967	0.0333801	0.194696	0.156601	2	A2M/ACKR1	MF
chemokine biosynthetic process	1/225	14/17910	0.162269	0.289472	0.208477	1	AGER	BP
chemokine metabolic process	1/225	14/17910	0.162269	0.289472	0.208477	1	AGER	BP
chemokine production	5/225	86/17910	0.00457066	0.0320797	0.0231037	5	AGER/IL1RL1/LPL/IL33/ALOX15B	BP
chemokine receptor binding	3/213	47/16967	0.0210977	0.164946	0.132672	3	CCL23/CXCL13/CXCL14	MF
chemokine secretion	4/225	20/17910	0.00010032	0.00186857	0.00134574	4	IL1RL1/LPL/IL33/ALOX15B	BP
chemokine-mediated signaling pathway	2/225	51/17910	0.134522	0.264099	0.190203	2	ACKR1/EDN1	BP
chemorepellent activity	1/213	10/16967	0.118708	0.292245	0.235064	1	SEMA3B	MF
chemorepulsion of axon	1/225	6/17910	0.0730587	0.190736	0.137367	1	SEMA3B	BP
chemotaxis	17/225	551/17910	0.000619863	0.0073472	0.00529143	17	VEGFD/AGER/ECSCR/S1PR1/CCL23/SPN/C5AR1/DOK2/SEMA3B/HBEGF/DUSP1/SFTPD/CXCL2/EDN1/NR4A1/CXCL13/CXCL14	BP
chitin binding	1/213	6/16967	0.0730083	0.246916	0.198603	1	CHI3L2	MF
chloride channel activity	1/213	61/16967	0.537913	0.669443	0.538457	1	CLCA2	MF
chloride transmembrane transport	1/225	70/17910	0.587982	0.658379	0.474162	1	CLCA2	BP
chloride transmembrane transporter activity	1/213	75/16967	0.613096	0.736694	0.59255	1	CLCA2	MF
chloride transport	1/225	92/17910	0.688415	0.737849	0.531397	1	CLCA2	BP
cholesterol binding	1/213	42/16967	0.412126	0.572979	0.460868	1	PROM2	MF
cholesterol homeostasis	3/225	91/17910	0.106842	0.234674	0.169011	3	FABP4/FGFR4/LPL	BP
cholesterol import	1/225	10/17910	0.118787	0.24699	0.177881	1	CD36	BP
cholesterol storage	3/225	16/17910	0.000970857	0.00998682	0.00719247	3	CD36/MSR1/LPL	BP
cholesterol transport	2/225	98/17910	0.349343	0.462959	0.333421	2	CD36/MSR1	BP
chondrocyte development	2/225	27/17910	0.0448923	0.153793	0.110761	2	TGFBR2/COL11A1	BP
chondrocyte development involved in endochondral bone morphogenesis	1/225	6/17910	0.0730587	0.190736	0.137367	1	TGFBR2	BP
chondrocyte differentiation	3/225	97/17910	0.123004	0.253617	0.182654	3	ACVRL1/TGFBR2/COL11A1	BP
chondrocyte differentiation involved in endochondral bone morphogenesis	1/225	11/17910	0.129864	0.257699	0.185594	1	TGFBR2	BP
chondrocyte hypertrophy	1/225	4/17910	0.0493163	0.156268	0.112544	1	TGFBR2	BP
chondroitin sulfate catabolic process	1/225	14/17910	0.162269	0.289472	0.208477	1	HYAL1	BP
chondroitin sulfate metabolic process	3/225	39/17910	0.0128204	0.0687219	0.0494933	3	SPOCK2/HYAL1/NDNF	BP
chondroitin sulfate proteoglycan metabolic process	3/225	42/17910	0.0156693	0.0800254	0.057634	3	SPOCK2/HYAL1/NDNF	BP
chordate embryonic development	14/225	581/17910	0.0153607	0.0789953	0.0568921	14	TMEM100/ACVRL1/FOXF1/CCNB1/CTHRC1/NEK2/CCNB2/HYAL1/TGFBR2/KLF2/EDN1/COL1A1/COL11A1/DSC3	BP
chromatin	4/226	500/18675	0.858455	0.953582	0.700929	4	HMGA1/KLF2/CENPA/TP63	CC
chromatin assembly	2/225	153/17910	0.575245	0.648541	0.467077	2	HMGA1/CENPA	BP
chromatin assembly or disassembly	2/225	178/17910	0.657497	0.714034	0.514245	2	HMGA1/CENPA	BP
chromatin binding	8/213	437/16967	0.185136	0.36289	0.291886	8	UBE2T/TOP2A/HMGA1/CDT1/CDK1/CENPA/FOS/TP63	MF
chromatin disassembly	1/225	20/17910	0.223519	0.349263	0.251538	1	HMGA1	BP
chromatin organization	11/225	722/17910	0.299311	0.417773	0.300879	11	CCNB1/HMGA1/AURKA/CCNA2/AURKB/LRRK2/CDK1/CENPA/FOXA2/SOX2/TP63	BP
chromatin remodeling	3/225	156/17910	0.312306	0.432217	0.311281	3	HMGA1/CENPA/TP63	BP
chromatin remodeling at centromere	1/225	46/17910	0.44138	0.540807	0.389487	1	CENPA	BP
chromatin silencing	1/225	83/17910	0.650672	0.708531	0.510281	1	HMGA1	BP
chromocenter	1/226	14/18675	0.156772	0.30393	0.223404	1	AURKB	CC
chromosomal part	13/226	855/18675	0.237392	0.398236	0.292723	13	CCNB1/MYBL2/NEK2/HMGA1/RECQL4/AURKB/BUB1B/CDT1/NCAPH/KLF2/CDK1/CENPA/TP63	CC
chromosomal region	8/226	337/18675	0.0531506	0.170535	0.125352	8	CCNB1/NEK2/RECQL4/AURKB/BUB1B/CDT1/CDK1/CENPA	CC
chromosome	17/226	982/18675	0.0880235	0.216633	0.159236	17	TOP2A/CCNB1/MYBL2/NUSAP1/NEK2/HMGA1/KIF4A/RECQL4/AURKB/BUB1B/CDT1/NCAPH/KLF2/CDK1/CENPA/IL33/TP63	CC
chromosome condensation	5/225	32/17910	4.57056e-05	0.00105528	0.000760006	5	TOP2A/CCNB1/NUSAP1/NCAPH/CDK1	BP
chromosome localization	3/225	72/17910	0.0620857	0.175976	0.126737	3	CCNB1/DLGAP5/CDT1	BP
chromosome movement towards spindle pole	1/225	7/17910	0.0847076	0.207349	0.149332	1	DLGAP5	BP
chromosome organization	24/225	1097/17910	0.00579532	0.037836	0.0272493	24	TOP2A/CCNB1/NUSAP1/NEK2/HMGA1/KIF4A/DLGAP5/AURKA/CCNA2/RECQL4/AURKB/CDC6/BUB1B/LRRK2/CDT1/PRC1/NCAPH/CDK1/CENPA/HMGB3/DUSP1/FOXA2/SOX2/TP63	BP
chromosome organization involved in meiotic cell cycle	1/225	52/17910	0.482294	0.572886	0.412591	1	NCAPH	BP
chromosome passenger complex	1/226	4/18675	0.0475391	0.15795	0.116101	1	AURKB	CC
chromosome segregation	13/225	275/17910	4.70149e-05	0.00106641	0.000768027	13	TOP2A/CCNB1/NUSAP1/NEK2/KIF4A/DLGAP5/AURKB/CDC6/BUB1B/CDT1/PRC1/NCAPH/DUSP1	BP
chromosome separation	8/225	68/17910	2.11816e-06	0.000103014	7.41902e-05	8	CCNB1/DLGAP5/AURKB/CDC6/BUB1B/CDT1/NCAPH/DUSP1	BP
chromosome, centromeric region	6/226	185/18675	0.0252954	0.107179	0.0787821	6	CCNB1/NEK2/AURKB/BUB1B/CDT1/CENPA	CC
chromosome, telomeric region	2/226	156/18675	0.565396	0.723918	0.532116	2	RECQL4/CDK1	CC
chronic inflammatory response	1/225	19/17910	0.213629	0.338705	0.243934	1	CXCL13	BP
chylomicron	1/226	12/18675	0.135972	0.288064	0.211741	1	LPL	CC
chylomicron remodeling	1/225	9/17910	0.10757	0.234674	0.169011	1	LPL	BP
ciliary basal body-plasma membrane docking	2/225	95/17910	0.335625	0.451266	0.325	2	NEK2/CDK1	BP
ciliary membrane	2/226	85/18675	0.274852	0.437846	0.321838	2	HHIP/PROM2	CC
ciliary part	2/226	415/18675	0.962576	0.999937	0.735003	2	HHIP/PROM2	CC
cilium	3/226	563/18675	0.968461	0.999937	0.735003	3	HHIP/AURKA/PROM2	CC
cilium assembly	2/225	335/17910	0.925686	0.937493	0.67518	2	NEK2/CDK1	BP
cilium organization	2/225	346/17910	0.933753	0.943759	0.679692	2	NEK2/CDK1	BP
circadian rhythm	2/225	201/17910	0.721498	0.762701	0.549295	2	TOP2A/CDK1	BP
circulatory system development	34/225	1128/17910	1.79378e-06	9.38864e-05	6.76166e-05	34	TEK/ANKRD1/TMEM100/ACVRL1/ECSCR/RGCC/S1PR1/NPR1/CDH5/EMP2/FOXF1/PECAM1/CLEC14A/MMRN2/CCNB1/CLDN5/AGTR2/HYAL1/TGFBR2/C5AR1/KLF2/CDK1/ANXA3/NDNF/AQP1/DSP/EDN1/NR4A1/COL1A1/THBS2/MYH11/COL3A1/COL11A1/CXCL13	BP
circulatory system process	12/225	532/17910	0.0369345	0.135873	0.0978554	12	TEK/AGER/ACVRL1/NPR1/EMP2/ADRB1/CACNA2D2/OLR1/AGTR2/HBEGF/DSP/EDN1	BP
clathrin binding	1/213	35/16967	0.357642	0.532922	0.428649	1	LRRK2	MF
clathrin-coated endocytic vesicle	5/226	59/18675	0.000730656	0.00667333	0.00490523	5	SFTPC/HBEGF/SFTPD/SFTPA1/SFTPB	CC
clathrin-coated endocytic vesicle membrane	1/226	40/18675	0.385862	0.56639	0.416324	1	HBEGF	CC
clathrin-coated vesicle	10/226	182/18675	7.70466e-05	0.00121793	0.000895238	10	ADRB2/VWF/SFTPC/HBEGF/SFTPD/IL7R/SFTPA1/EDN1/NRGN/SFTPB	CC
clathrin-coated vesicle membrane	4/226	110/18675	0.0447074	0.15795	0.116101	4	ADRB2/HBEGF/IL7R/NRGN	CC
cleavage furrow	2/226	55/18675	0.143058	0.297615	0.218762	2	KIF20A/CEP55	CC
cleavage furrow formation	1/225	7/17910	0.0847076	0.207349	0.149332	1	AURKB	BP
cloaca development	1/225	4/17910	0.0493163	0.156268	0.112544	1	TP63	BP
cloacal septation	1/225	3/17910	0.037219	0.135873	0.0978554	1	TP63	BP
cluster of actin-based cell projections	2/226	143/18675	0.518398	0.685086	0.503572	2	CD36/AQP1	CC
co-receptor binding	1/213	9/16967	0.107498	0.284908	0.229162	1	LRRK2	MF
coagulation	10/225	337/17910	0.0104327	0.05899	0.0424844	10	CPB2/CD36/SELP/VWF/A2M/EDN1/COL1A1/COL3A1/FOXA2/SERPINA1	BP
coated vesicle	11/226	261/18675	0.000352389	0.00402311	0.00295718	11	ADRB2/VWF/SFTPC/HBEGF/SFTPD/IL7R/SFTPA1/EDN1/NRGN/SFTPB/SERPINA1	CC
coated vesicle membrane	4/226	169/18675	0.149231	0.300656	0.220997	4	ADRB2/HBEGF/IL7R/NRGN	CC
cochlea development	2/225	49/17910	0.126058	0.257699	0.185594	2	CTHRC1/CCNA2	BP
cochlea morphogenesis	1/225	24/17910	0.261854	0.383102	0.275909	1	CTHRC1	BP
coenzyme binding	5/213	257/16967	0.222122	0.406153	0.326683	5	GPD1/GAPDH/DUOX1/GPT2/STEAP4	MF
coenzyme biosynthetic process	4/225	245/17910	0.370419	0.48098	0.3464	4	GPD1/PDK4/GAPDH/FBP1	BP
coenzyme metabolic process	5/225	366/17910	0.488239	0.57831	0.416497	5	GPD1/PDK4/GAPDH/SLC2A1/FBP1	BP
cofactor binding	7/213	438/16967	0.312158	0.489372	0.39362	7	GPD1/AOC3/CYP4B1/GAPDH/DUOX1/GPT2/STEAP4	MF
cofactor biosynthetic process	6/225	310/17910	0.196038	0.324751	0.233885	6	GPD1/PDK4/GAPDH/PSAT1/DUOX1/FBP1	BP
cofactor catabolic process	2/225	50/17910	0.130274	0.257699	0.185594	2	GPX3/DUOX1	BP
cofactor metabolic process	10/225	543/17910	0.147299	0.277904	0.200145	10	GPD1/GPX3/PDK4/GAPDH/PSAT1/SLC2A1/DUOX1/GPT2/FBP1/AKR1B10	BP
cognition	6/225	286/17910	0.152111	0.279333	0.201175	6	AGER/CLDN5/MGAT3/C5AR1/NRGN/FOS	BP
cold-induced thermogenesis	4/225	143/17910	0.106138	0.234674	0.169011	4	FABP4/ADRB2/ADRB1/CD36	BP
collagen binding	3/213	61/16967	0.0412622	0.209887	0.16882	3	VWF/MMP12/MMP13	MF
collagen biosynthetic process	2/225	53/17910	0.14311	0.271253	0.195356	2	RGCC/COL1A1	BP
collagen catabolic process	5/225	37/17910	9.40079e-05	0.00180406	0.00129928	5	MMP11/MMP12/MMP1/MMP13/MMP10	BP
collagen fibril organization	4/225	45/17910	0.00241375	0.0200378	0.0144311	4	MMP11/COL1A1/COL3A1/COL11A1	BP
collagen metabolic process	7/225	102/17910	0.000302282	0.00451184	0.00324941	7	RGCC/MMP11/MMP12/MMP1/COL1A1/MMP13/MMP10	BP
collagen receptor activity	1/213	5/16967	0.0612196	0.230339	0.18527	1	OSCAR	MF
collagen trimer	13/226	86/18675	3.3736e-11	3.46638e-09	2.54796e-09	13	CTHRC1/MARCO/MSR1/COLEC12/SFTPD/COL10A1/SFTPA1/COL1A1/C1QA/C1QB/COL3A1/COL11A1/COL17A1	CC
collagen-activated signaling pathway	1/225	9/17910	0.10757	0.234674	0.169011	1	OSCAR	BP
collagen-containing extracellular matrix	21/226	399/18675	1.85356e-08	1.0883e-06	7.99957e-07	21	GDF10/CLEC14A/MMRN2/VWF/CTHRC1/OGN/A2M/PRG4/LTBP4/LAD1/SEMA3B/COL10A1/COL1A1/C1QA/THBS2/C1QB/COL3A1/COL11A1/COL17A1/SLPI/SERPINA1	CC
collateral sprouting	2/225	26/17910	0.0419063	0.145931	0.105099	2	SPP1/CRABP2	BP
columnar/cuboidal epithelial cell differentiation	1/225	106/17910	0.739216	0.779112	0.561114	1	TP63	BP
common-partner SMAD protein phosphorylation	1/225	6/17910	0.0730587	0.190736	0.137367	1	TGFBR2	BP
complement activation	8/225	128/17910	0.000215115	0.00339587	0.00244569	8	RGCC/CPB2/C5AR1/VSIG4/A2M/C7/C1QA/C1QB	BP
complement activation, alternative pathway	2/225	16/17910	0.0167917	0.0830775	0.0598321	2	VSIG4/C7	BP
complement activation, classical pathway	3/225	91/17910	0.106842	0.234674	0.169011	3	C7/C1QA/C1QB	BP
complement activation, lectin pathway	1/225	11/17910	0.129864	0.257699	0.185594	1	A2M	BP
complement binding	3/213	20/16967	0.00189942	0.0354975	0.0285519	3	CD93/C5AR1/VSIG4	MF
complement component C1q binding	1/213	8/16967	0.0961456	0.274014	0.220399	1	CD93	MF
complement component C3b binding	1/213	5/16967	0.0612196	0.230339	0.18527	1	VSIG4	MF
complement receptor activity	1/213	4/16967	0.0492817	0.209887	0.16882	1	C5AR1	MF
complement receptor mediated signaling pathway	1/225	6/17910	0.0730587	0.190736	0.137367	1	C5AR1	BP
complement-mediated synapse pruning	1/225	3/17910	0.037219	0.135873	0.0978554	1	C1QA	BP
complex of collagen trimers	3/226	18/18675	0.00124777	0.0102567	0.00753918	3	COL1A1/COL3A1/COL11A1	CC
condensed chromosome	8/226	199/18675	0.00298633	0.0188828	0.0138798	8	TOP2A/CCNB1/NEK2/AURKB/BUB1B/CDT1/NCAPH/CENPA	CC
condensed chromosome kinetochore	5/226	100/18675	0.00737657	0.0374293	0.0275124	5	CCNB1/NEK2/BUB1B/CDT1/CENPA	CC
condensed chromosome outer kinetochore	2/226	12/18675	0.00888421	0.0439929	0.0323369	2	CCNB1/BUB1B	CC
condensed chromosome, centromeric region	6/226	110/18675	0.0022128	0.0165357	0.0121545	6	CCNB1/NEK2/AURKB/BUB1B/CDT1/CENPA	CC
condensed nuclear chromosome	4/226	75/18675	0.012998	0.0613953	0.0451286	4	CCNB1/NEK2/AURKB/CENPA	CC
condensed nuclear chromosome kinetochore	2/226	7/18675	0.00294178	0.0188828	0.0138798	2	CCNB1/CENPA	CC
condensed nuclear chromosome outer kinetochore	1/226	4/18675	0.0475391	0.15795	0.116101	1	CCNB1	CC
condensed nuclear chromosome, centromeric region	3/226	17/18675	0.00104913	0.00879988	0.00646835	3	CCNB1/AURKB/CENPA	CC
condensin complex	1/226	7/18675	0.0817106	0.207303	0.152378	1	NCAPH	CC
conditioned taste aversion	1/225	5/17910	0.0612622	0.17431	0.125538	1	FOS	BP
connective tissue development	7/225	243/17910	0.0342033	0.135873	0.0978554	7	ACVRL1/HYAL1/TGFBR2/EDN1/COL1A1/COL11A1/MMP13	BP
connective tissue replacement	1/225	21/17910	0.233285	0.357186	0.257244	1	AGER	BP
connective tissue replacement involved in inflammatory response wound healing	1/225	7/17910	0.0847076	0.207349	0.149332	1	AGER	BP
connexin complex	1/226	21/18675	0.225722	0.388167	0.285322	1	GJB2	CC
contractile actin filament bundle	1/226	56/18675	0.494822	0.668986	0.491738	1	TEK	CC
contractile actin filament bundle assembly	2/225	97/17910	0.34478	0.460087	0.331353	2	RGCC/S1PR1	BP
contractile fiber	5/226	209/18675	0.110411	0.254937	0.187391	5	MYZAP/ANKRD1/PECAM1/SLC2A1/MYH11	CC
contractile fiber part	5/226	192/18675	0.084276	0.211204	0.155245	5	MYZAP/ANKRD1/PECAM1/SLC2A1/MYH11	CC
contractile ring	1/226	9/18675	0.103811	0.243807	0.17921	1	PRC1	CC
COPII vesicle coating	1/225	65/17910	0.560992	0.637824	0.459359	1	SERPINA1	BP
COPII-coated ER to Golgi transport vesicle	1/226	69/18675	0.569004	0.726275	0.533848	1	SERPINA1	CC
COPII-coated vesicle budding	1/225	70/17910	0.587982	0.658379	0.474162	1	SERPINA1	BP
copper ion binding	1/213	53/16967	0.488597	0.630939	0.507487	1	AOC3	MF
copulation	1/225	20/17910	0.223519	0.349263	0.251538	1	PI3	BP
core promoter binding	2/213	42/16967	0.0974534	0.275432	0.22154	2	MMP12/FOS	MF
core promoter sequence-specific DNA binding	1/213	32/16967	0.33278	0.508461	0.408974	1	FOS	MF
cornification	10/225	112/17910	1.48392e-06	8.32686e-05	5.99698e-05	10	DSP/PERP/KRT15/KRT17/PKP1/DSG3/DSC3/SPRR2D/SPRR3/PI3	BP
cornified envelope	7/226	44/18675	9.07137e-07	2.6631e-05	1.95751e-05	7	DSP/PKP1/DSG3/DSC3/SPRR2D/SPRR3/PI3	CC
cortical actin cytoskeleton	3/226	57/18675	0.0317223	0.127822	0.0939555	3	MYZAP/CLDN5/SLC2A1	CC
cortical cytoskeleton	3/226	81/18675	0.0751763	0.198061	0.145584	3	MYZAP/CLDN5/SLC2A1	CC
corticosteroid hormone secretion	1/225	15/17910	0.172801	0.301349	0.21703	1	AGTR2	BP
covalent chromatin modification	6/225	433/17910	0.4621	0.556805	0.401009	6	CCNB1/AURKA/CCNA2/AURKB/LRRK2/CDK1	BP
cranial skeletal system development	3/225	65/17910	0.0484141	0.156268	0.112544	3	CEP55/TGFBR2/TP63	BP
CTP biosynthetic process	1/225	14/17910	0.162269	0.289472	0.208477	1	NME1	BP
CTP metabolic process	1/225	14/17910	0.162269	0.289472	0.208477	1	NME1	BP
cullin-RING ubiquitin ligase complex	2/226	124/18675	0.443948	0.614353	0.451579	2	UBE2C/BUB1B	CC
cuticle development	1/225	3/17910	0.037219	0.135873	0.0978554	1	DUOX1	BP
CXCR chemokine receptor binding	1/213	10/16967	0.118708	0.292245	0.235064	1	CXCL13	MF
CXCR3 chemokine receptor binding	1/213	5/16967	0.0612196	0.230339	0.18527	1	CXCL13	MF
cyclase activity	1/213	18/16967	0.203488	0.381619	0.30695	1	NPR1	MF
cyclic nucleotide biosynthetic process	1/225	18/17910	0.203614	0.330995	0.238381	1	NPR1	BP
cyclic nucleotide metabolic process	1/225	36/17910	0.365916	0.475515	0.342464	1	NPR1	BP
cyclic nucleotide-gated ion channel activity	1/213	8/16967	0.0961456	0.274014	0.220399	1	AQP1	MF
cyclic purine nucleotide metabolic process	1/225	18/17910	0.203614	0.330995	0.238381	1	NPR1	BP
cyclic-nucleotide-mediated signaling	4/225	166/17910	0.156705	0.286581	0.206394	4	NPR1/ADRB1/CD36/AQP1	BP
cyclin A2-CDK2 complex	1/226	3/18675	0.0358695	0.136504	0.100337	1	CCNA2	CC
cyclin binding	1/213	28/16967	0.298135	0.476165	0.382997	1	CDK1	MF
cyclin-dependent protein kinase activity	2/213	15/16967	0.014791	0.125411	0.100873	2	CCNA2/CDK1	MF
cyclin-dependent protein kinase holoenzyme complex	3/226	29/18675	0.0050667	0.0274002	0.0201405	3	CCNB1/CCNA2/CDK1	CC
cyclin-dependent protein serine/threonine kinase activator activity	1/213	4/16967	0.0492817	0.209887	0.16882	1	CCNB1	MF
cyclin-dependent protein serine/threonine kinase activity	1/213	14/16967	0.162165	0.342537	0.275515	1	CDK1	MF
cyclin-dependent protein serine/threonine kinase regulator activity	1/213	18/16967	0.203488	0.381619	0.30695	1	CCNB1	MF
cysteine-type endopeptidase inhibitor activity	1/213	53/16967	0.488597	0.630939	0.507487	1	CST1	MF
cytochrome-b5 reductase activity, acting on NAD(P)H	1/213	7/16967	0.0846497	0.264037	0.212375	1	NQO1	MF
cytokine activity	7/213	154/16967	0.00333854	0.0515334	0.0414502	7	CCL23/SPP1/CSF3/IL33/EDN1/CXCL13/CXCL14	MF
cytokine binding	7/213	100/16967	0.000265495	0.010685	0.00859435	7	ACVRL1/CD36/LRRC32/TGFBR2/A2M/ACKR1/LTBP4	MF
cytokine biosynthetic process	3/225	120/17910	0.191827	0.321584	0.231604	3	AGER/SPN/SFTPD	BP
cytokine metabolic process	3/225	121/17910	0.195017	0.323424	0.232929	3	AGER/SPN/SFTPD	BP
cytokine production	21/225	765/17910	0.000674212	0.00773425	0.00557018	21	AGER/RGCC/FABP4/CD36/SPN/LRRC32/IL1RL1/FGR/LPL/AGTR2/C5AR1/LRRK2/VSIG4/KLF2/GAPDH/FERMT1/IL33/SFTPD/MMP12/CDH3/ALOX15B	BP
cytokine production involved in immune response	1/225	101/17910	0.722097	0.762701	0.549295	1	CD36	BP
cytokine receptor activity	2/213	78/16967	0.256505	0.425389	0.342156	2	IL1RL1/IL7R	MF
cytokine receptor binding	6/213	210/16967	0.0495082	0.209887	0.16882	6	VEGFD/CDH5/CCL23/TGFBR2/CXCL13/CXCL14	MF
cytokine secretion	14/225	230/17910	1.32114e-06	7.50849e-05	5.40759e-05	14	AGER/RGCC/CD36/LRRC32/IL1RL1/FGR/LPL/AGTR2/LRRK2/GAPDH/FERMT1/IL33/MMP12/ALOX15B	BP
cytokine-mediated signaling pathway	16/225	764/17910	0.0320006	0.131108	0.0944235	16	S1PR1/CLDN18/CD36/IL1RL1/ACKR1/ALOX5/DUOX1/CSF3/IL33/IL7R/CXCL2/MMP12/EDN1/MMP1/FOS/SOX2	BP
cytokinesis	8/225	147/17910	0.000547144	0.00673747	0.0048523	8	NUSAP1/KIF20A/CEP55/KIF4A/AURKB/CDC6/PRC1/CENPA	BP
cytokinetic process	3/225	37/17910	0.0111012	0.0613793	0.0442052	3	KIF20A/CEP55/AURKB	BP
cytolysis	2/225	40/17910	0.0898271	0.217479	0.156627	2	C7/LYZ	BP
cytoplasmic region	5/226	402/18675	0.53812	0.704355	0.517735	5	MYZAP/CLDN5/KIF4A/LRRK2/SLC2A1	CC
cytoplasmic side of membrane	3/226	138/18675	0.23402	0.396014	0.291089	3	MYZAP/LRRK2/CAV2	CC
cytoplasmic side of plasma membrane	2/226	114/18675	0.402298	0.579785	0.42617	2	MYZAP/CAV2	CC
cytoplasmic vesicle	54/226	2179/18675	1.78549e-07	6.39556e-06	4.70105e-06	54	VEGFD/MCEMP1/S1PR1/ADRB2/EMP2/FGD5/PECAM1/ADRB1/RETN/CD36/AOC3/FGFR4/CD93/SELP/VWF/SFTPC/HSD17B6/OSCAR/FGR/LAMP3/OLR1/MARCO/MSR1/MRC1/HYAL1/C5AR1/LRRK2/PPBP/A2M/CAV2/SLC2A1/COLEC12/ACKR1/ALOX5/ANXA3/IL33/HBEGF/SFTPD/DSP/IL7R/SFTPA1/PROM2/EDN1/NRGN/COL1A1/THBS2/GPRC5A/MYH11/LYZ/STEAP4/SLPI/SFTPB/SERPINA1/PKP1	CC
cytoplasmic vesicle lumen	11/226	338/18675	0.00283902	0.0188828	0.0138798	11	VEGFD/RETN/VWF/OSCAR/FGR/PPBP/A2M/ALOX5/LYZ/SLPI/SERPINA1	CC
cytoplasmic vesicle membrane	21/226	735/18675	0.000245476	0.00320892	0.00235872	21	MCEMP1/ADRB2/PECAM1/CD36/CD93/SELP/LAMP3/OLR1/MARCO/MSR1/C5AR1/LRRK2/CAV2/COLEC12/ANXA3/HBEGF/DSP/IL7R/NRGN/GPRC5A/PKP1	CC
cytoplasmic vesicle part	37/226	1450/18675	1.19128e-05	0.000222553	0.000163587	37	VEGFD/MCEMP1/ADRB2/PECAM1/RETN/CD36/CD93/SELP/VWF/SFTPC/HSD17B6/OSCAR/FGR/LAMP3/OLR1/MARCO/MSR1/MRC1/C5AR1/LRRK2/PPBP/A2M/CAV2/COLEC12/ALOX5/ANXA3/HBEGF/DSP/IL7R/NRGN/GPRC5A/LYZ/STEAP4/SLPI/SFTPB/SERPINA1/PKP1	CC
cytoskeletal part	26/226	1543/18675	0.0535256	0.170535	0.125352	26	MYZAP/TEK/RGCC/TOP2A/NME1/CCNB1/CLDN5/TPX2/KIF20A/CEP55/NEK2/CCNB2/KIF4A/DLGAP5/AURKA/AURKB/CDC6/BUB1B/PRC1/CDK1/SLC2A1/DSP/MYH11/KRT15/KRT17/PKP1	CC
cytoskeletal protein binding	9/213	797/16967	0.674647	0.784049	0.630639	9	ANKRD1/NME1/TNS1/LRRK2/PRC1/GAPDH/FERMT1/MYH11/TNS4	MF
cytoskeleton	36/226	2041/18675	0.0132736	0.0613953	0.0451286	36	MYZAP/TEK/PTPN21/RGCC/FGD5/CAVIN2/TOP2A/NME1/CCNB1/CLDN5/TNS1/TPX2/KIF20A/CEP55/NEK2/CCNB2/FGR/KIF4A/DLGAP5/AURKA/AURKB/CDC6/BUB1B/PRC1/GAPDH/CDK1/SLC2A1/FERMT1/LAD1/DSP/MYH11/TNS4/ALOX15B/KRT15/KRT17/PKP1	CC
cytoskeleton organization	27/225	1124/17910	0.000917486	0.00980052	0.0070583	27	TEK/ANKRD1/RGCC/S1PR1/EMP2/FGD5/CCNB1/TPX2/MYBL2/NUSAP1/KIF20A/NEK2/KIF4A/AURKA/AURKB/PRC1/GAPDH/CDK1/CENPA/CSF3/AQP1/DSP/EDN1/MYH11/KRT15/KRT17/PKP1	BP
cytoskeleton-dependent cytokinesis	6/225	82/17910	0.000581432	0.00702312	0.00505803	6	NUSAP1/KIF20A/CEP55/KIF4A/AURKB/CENPA	BP
cytoskeleton-dependent intracellular transport	1/225	154/17910	0.858484	0.878906	0.632985	1	KIF4A	BP
cytosol	72/226	4909/18675	0.0348575	0.136504	0.100337	72	GPD1/ANKRD1/FHL1/ECSCR/RGCC/FABP4/INMT/EMP2/GIMAP8/CAVIN2/ARHGAP31/NME1/UBE2C/CCNB1/TPX2/GIMAP6/RRM2/NEK2/CCNB2/FGR/HMGA1/KIF4A/DLGAP5/AURKA/CCNA2/KPNA2/AURKB/CDC6/TGFBR2/BUB1B/LRRK2/CDT1/PRC1/DOK2/NCAPH/A2M/GAPDH/CDK1/MYRF/PSAT1/CENPA/SLC2A1/CDCA7/ALOX5/ANXA3/CDKN3/FERMT1/CRABP2/HSPB8/SLC7A5/GJB2/FBP1/NR4A1/NRGN/SELENBP1/MYH11/FOS/TNS4/ALOX15B/SFN/GPX2/KRT15/NQO1/KRT17/AKR1B10/SOX2/DSG3/TP63/SPR…	CC
cytosolic part	2/226	207/18675	0.71732	0.839939	0.617397	2	RRM2/LRRK2	CC
cytosolic transport	2/225	140/17910	0.527138	0.610609	0.439759	2	EMP2/LRRK2	BP
D-glucose transmembrane transporter activity	1/213	3/16967	0.0371927	0.194696	0.156601	1	SLC2A1	MF
D-loop DNA binding	1/213	4/16967	0.0492817	0.209887	0.16882	1	RECQL4	MF
damaged DNA binding	2/213	60/16967	0.173777	0.354336	0.285006	2	RECQL4/TP63	MF
daunorubicin metabolic process	1/225	9/17910	0.10757	0.234674	0.169011	1	AKR1B10	BP
decidualization	2/225	24/17910	0.0361724	0.135873	0.0978554	2	SPP1/GJB2	BP
defense response	44/225	1681/17910	2.04048e-06	0.000102143	7.3563e-05	44	TEK/AGER/FABP4/CDH5/FOXF1/CPB2/CD36/AOC3/SPN/IL1RL1/SELP/AQP4/FGR/OLR1/MARCO/LPL/MRC1/HYAL1/C5AR1/LRRK2/VSIG4/PPBP/A2M/GAPDH/SPP1/COLEC12/HMGB3/ACKR1/ALOX5/ANXA3/PBK/IL33/C7/SFTPD/SFTPA1/MMP12/EDN1/C1QA/C1QB/FOS/CXCL13/LYZ/SLPI/SERPINA1	BP
defense response to bacterium	11/225	245/17910	0.000281287	0.00424131	0.00305458	11	CD36/SPN/SELP/FGR/C5AR1/PPBP/ANXA3/SFTPD/CXCL13/LYZ/SLPI	BP
defense response to fungus	1/225	40/17910	0.397249	0.504152	0.363089	1	GAPDH	BP
defense response to Gram-negative bacterium	1/225	72/17910	0.598309	0.665405	0.479223	1	SELP	BP
defense response to Gram-positive bacterium	4/225	86/17910	0.0231332	0.103909	0.0748348	4	CD36/FGR/C5AR1/LYZ	BP
defense response to other organism	14/225	481/17910	0.00315062	0.0246412	0.0177465	14	CD36/SPN/SELP/FGR/C5AR1/PPBP/GAPDH/ANXA3/IL33/SFTPD/MMP12/CXCL13/LYZ/SLPI	BP
defense response to virus	2/225	231/17910	0.789598	0.822214	0.592156	2	IL33/MMP12	BP
definitive hemopoiesis	1/225	20/17910	0.223519	0.349263	0.251538	1	TEK	BP
dehydroascorbic acid transmembrane transporter activity	1/213	3/16967	0.0371927	0.194696	0.156601	1	SLC2A1	MF
dehydroascorbic acid transport	1/225	3/17910	0.037219	0.135873	0.0978554	1	SLC2A1	BP
dendrite	6/226	514/18675	0.592794	0.747284	0.54929	6	ACVRL1/LRRK2/ANXA3/NRGN/NQO1/TP63	CC
dendrite cytoplasm	1/226	30/18675	0.306187	0.480316	0.353056	1	LRRK2	CC
dendrite development	1/225	216/17910	0.935905	0.945718	0.681103	1	LRRK2	BP
dendrite morphogenesis	1/225	131/17910	0.810285	0.838859	0.604143	1	LRRK2	BP
dendritic cell differentiation	2/225	43/17910	0.101527	0.232234	0.167254	2	AGER/TGFBR2	BP
dendritic spine	1/226	142/18675	0.823693	0.935188	0.687409	1	NRGN	CC
dendritic spine development	1/225	94/17910	0.696235	0.743713	0.53562	1	LRRK2	BP
dendritic spine head	1/226	6/18675	0.0704579	0.193631	0.142328	1	NRGN	CC
dendritic spine morphogenesis	1/225	55/17910	0.501618	0.588585	0.423897	1	LRRK2	BP
dendritic spine organization	1/225	77/17910	0.623015	0.684976	0.493317	1	LRRK2	BP
dendritic tree	6/226	516/18675	0.596588	0.747554	0.549489	6	ACVRL1/LRRK2/ANXA3/NRGN/NQO1/TP63	CC
deoxyribonuclease activity	1/213	41/16967	0.404634	0.567808	0.456708	1	NME1	MF
deoxyribonucleotide biosynthetic process	1/225	10/17910	0.118787	0.24699	0.177881	1	RRM2	BP
deoxyribonucleotide metabolic process	1/225	29/17910	0.307134	0.426009	0.30681	1	RRM2	BP
dephosphorylation	9/225	458/17910	0.124293	0.256156	0.184483	9	PTPN21/PPP1R14B/DLGAP5/AGTR2/CDKN3/DUSP1/FBP1/ALPL/IGFBP3	BP
desensitization of G protein-coupled receptor signaling pathway	1/225	19/17910	0.213629	0.338705	0.243934	1	ADRB2	BP
desmosome	5/226	25/18675	1.08283e-05	0.000211925	0.000155775	5	DSP/PERP/PKP1/DSG3/DSC3	CC
desmosome organization	1/225	9/17910	0.10757	0.234674	0.169011	1	DSP	BP
detection of abiotic stimulus	1/225	128/17910	0.802897	0.832571	0.599615	1	COL11A1	BP
detection of carbohydrate stimulus	1/225	4/17910	0.0493163	0.156268	0.112544	1	FOXA2	BP
detection of chemical stimulus	2/225	498/17910	0.987324	0.991125	0.713805	2	CST1/FOXA2	BP
detection of chemical stimulus involved in sensory perception	1/225	465/17910	0.997412	0.999689	0.719973	1	CST1	BP
detection of chemical stimulus involved in sensory perception of bitter taste	1/225	29/17910	0.307134	0.426009	0.30681	1	CST1	BP
detection of chemical stimulus involved in sensory perception of taste	1/225	35/17910	0.357833	0.470007	0.338498	1	CST1	BP
detection of external stimulus	2/225	125/17910	0.467258	0.5618	0.404607	2	FOXF1/COL11A1	BP
detection of glucose	1/225	4/17910	0.0493163	0.156268	0.112544	1	FOXA2	BP
detection of hexose stimulus	1/225	4/17910	0.0493163	0.156268	0.112544	1	FOXA2	BP
detection of mechanical stimulus	1/225	36/17910	0.365916	0.475515	0.342464	1	COL11A1	BP
detection of mechanical stimulus involved in sensory perception	1/225	28/17910	0.298305	0.416728	0.300126	1	COL11A1	BP
detection of mechanical stimulus involved in sensory perception of sound	1/225	11/17910	0.129864	0.257699	0.185594	1	COL11A1	BP
detection of monosaccharide stimulus	1/225	4/17910	0.0493163	0.156268	0.112544	1	FOXA2	BP
detection of stimulus	4/225	672/17910	0.971561	0.976407	0.703205	4	FOXF1/COL11A1/CST1/FOXA2	BP
detection of stimulus involved in sensory perception	2/225	518/17910	0.989878	0.993464	0.715489	2	COL11A1/CST1	BP
determination of adult lifespan	1/225	16/17910	0.183202	0.310212	0.223414	1	LRRK2	BP
determination of bilateral symmetry	2/225	123/17910	0.45894	0.55496	0.39968	2	FOXF1/TGFBR2	BP
determination of heart left/right asymmetry	1/225	64/17910	0.555386	0.634053	0.456642	1	TGFBR2	BP
determination of left/right symmetry	2/225	114/17910	0.420613	0.522877	0.376574	2	FOXF1/TGFBR2	BP
detoxification	7/225	113/17910	0.000562836	0.00687342	0.00495021	7	CD36/GPX3/ALOX5AP/DUOX1/GPX2/NQO1/AKR1B10	BP
development of primary female sexual characteristics	1/225	100/17910	0.718541	0.760213	0.547503	1	RETN	BP
development of primary sexual characteristics	1/225	223/17910	0.941398	0.950186	0.684321	1	RETN	BP
developmental cell growth	7/225	216/17910	0.0195942	0.0927014	0.0667632	7	SEMA3G/AURKA/AGTR2/TGFBR2/SPP1/CRABP2/EDN1	BP
developmental growth	16/225	624/17910	0.00561959	0.0370158	0.0266587	16	SEMA3G/S1PR1/ADRB2/ADRB1/CCNB1/CACNA2D2/AURKA/AGTR2/TGFBR2/KLF2/CDK1/SPP1/CRABP2/EDN1/MMP13/SOX2	BP
developmental growth involved in morphogenesis	6/225	214/17910	0.0535479	0.166464	0.119887	6	SEMA3G/S1PR1/AURKA/TGFBR2/SPP1/CRABP2	BP
developmental maturation	10/225	262/17910	0.00181351	0.0162191	0.0116809	10	ACVRL1/S1PR1/CDH5/CCNB1/AURKA/LRRK2/KLF2/FERMT1/CDH3/C1QA	BP
developmental process involved in reproduction	8/225	649/17910	0.572124	0.64537	0.464794	8	RETN/CCNB1/AURKA/SPP1/GJB2/ALPL/ALOX15B/TP63	BP
diapedesis	1/225	6/17910	0.0730587	0.190736	0.137367	1	PECAM1	BP
dicarboxylic acid metabolic process	1/225	87/17910	0.667978	0.721	0.519262	1	GPT2	BP
diencephalon development	1/225	73/17910	0.603376	0.669361	0.482071	1	SOX2	BP
diet induced thermogenesis	2/225	11/17910	0.00802	0.0485692	0.0349794	2	ADRB2/ADRB1	BP
digestion	2/225	132/17910	0.495765	0.583725	0.420397	2	CD36/AQP1	BP
digestive system development	6/225	143/17910	0.00945145	0.0545965	0.0393202	6	FOXF1/CLDN18/CCNB1/TGFBR2/COL3A1/TP63	BP
digestive system process	2/225	94/17910	0.331033	0.448219	0.322806	2	CD36/AQP1	BP
digestive tract development	6/225	132/17910	0.00648646	0.0414329	0.0298399	6	FOXF1/CLDN18/CCNB1/TGFBR2/COL3A1/TP63	BP
digestive tract morphogenesis	2/225	48/17910	0.121876	0.251759	0.181316	2	FOXF1/TP63	BP
dioxygenase activity	2/213	85/16967	0.289099	0.4655	0.374419	2	ALOX5/ALOX15B	MF
direct ossification	1/225	6/17910	0.0730587	0.190736	0.137367	1	COL1A1	BP
disaccharide biosynthetic process	1/225	3/17910	0.037219	0.135873	0.0978554	1	SLC2A1	BP
disaccharide metabolic process	1/225	9/17910	0.10757	0.234674	0.169011	1	SLC2A1	BP
disordered domain specific binding	1/213	31/16967	0.324282	0.499278	0.401588	1	GAPDH	MF
disruption by host of symbiont cells	1/225	14/17910	0.162269	0.289472	0.208477	1	GAPDH	BP
disruption by symbiont of host cell	1/225	4/17910	0.0493163	0.156268	0.112544	1	GAPDH	BP
disruption of cells of other organism	2/225	60/17910	0.173979	0.301741	0.217313	2	GAPDH/LYZ	BP
disruption of cells of other organism involved in symbiotic interaction	1/225	17/17910	0.193473	0.321584	0.231604	1	GAPDH	BP
distal axon	1/226	262/18675	0.95975	0.999937	0.735003	1	LRRK2	CC
diterpenoid biosynthetic process	1/225	10/17910	0.118787	0.24699	0.177881	1	CRABP2	BP
diterpenoid metabolic process	3/225	97/17910	0.123004	0.253617	0.182654	3	LPL/CRABP2/AKR1B10	BP
divalent inorganic anion homeostasis	1/225	12/17910	0.140802	0.268154	0.193124	1	FGFR4	BP
divalent inorganic cation homeostasis	6/225	412/17910	0.415391	0.520031	0.374524	6	S1PR1/CCL23/CD36/CD52/EDN1/CXCL13	BP
divalent inorganic cation transport	3/225	458/17910	0.929839	0.940447	0.677307	3	SLC39A8/CACNA2D2/RRAD	BP
divalent metal ion transport	3/225	454/17910	0.92721	0.93843	0.675854	3	SLC39A8/CACNA2D2/RRAD	BP
DNA alkylation	1/225	71/17910	0.593178	0.661524	0.476427	1	FOS	BP
DNA binding	23/213	2196/16967	0.851822	0.914036	0.735193	23	ANKRD1/FOXF1/TOP2A/NME1/MYBL2/NUSAP1/HMGA1/KIF4A/RECQL4/CDT1/FOXM1/KLF2/HMGB3/FOSB/ETV4/ATOH8/MMP12/NR4A1/FOS/FOXA2/SLPI/SOX2/TP63	MF
DNA binding, bending	2/213	19/16967	0.0233106	0.177633	0.142877	2	TOP2A/HMGB3	MF
DNA biosynthetic process	7/225	192/17910	0.0108832	0.0606857	0.0437056	7	ANKRD1/ACVRL1/RGCC/FGFR4/NEK2/AURKB/DUSP1	BP
DNA conformation change	9/225	279/17910	0.00891406	0.0528996	0.0380981	9	TOP2A/CCNB1/NUSAP1/HMGA1/RECQL4/NCAPH/CDK1/CENPA/HMGB3	BP
DNA damage checkpoint	5/225	133/17910	0.0263826	0.11388	0.0820157	5	RGCC/CCNB1/AURKA/CDK1/SFN	BP
DNA damage response, signal transduction by p53 class mediator	7/225	106/17910	0.0003824	0.00545073	0.0039256	7	ANKRD1/RGCC/CCNB1/AURKA/FOXM1/CDK1/SFN	BP
DNA damage response, signal transduction by p53 class mediator resulting in cell cycle arrest	5/225	56/17910	0.000678913	0.00775676	0.00558639	5	RGCC/CCNB1/AURKA/CDK1/SFN	BP
DNA damage response, signal transduction by p53 class mediator resulting in transcription of p21 class mediator	1/225	17/17910	0.193473	0.321584	0.231604	1	FOXM1	BP
DNA damage response, signal transduction resulting in transcription	1/225	18/17910	0.203614	0.330995	0.238381	1	FOXM1	BP
DNA duplex unwinding	3/225	76/17910	0.0706166	0.190736	0.137367	3	TOP2A/HMGA1/RECQL4	BP
DNA geometric change	4/225	86/17910	0.0231332	0.103909	0.0748348	4	TOP2A/HMGA1/RECQL4/HMGB3	BP
DNA helicase activity	1/213	42/16967	0.412126	0.572979	0.460868	1	RECQL4	MF
DNA integrity checkpoint	7/225	141/17910	0.00205103	0.017793	0.0128145	7	RGCC/CCNB1/AURKA/CDC6/CDT1/CDK1/SFN	BP
DNA ligation	1/225	17/17910	0.193473	0.321584	0.231604	1	TOP2A	BP
DNA metabolic process	23/225	963/17910	0.00238078	0.0198819	0.0143188	23	ANKRD1/ACVRL1/RGCC/UBE2T/TOP2A/NME1/FGFR4/RRM2/NEK2/HMGA1/CCNA2/RECQL4/KPNA2/AURKB/CDC6/CDT1/FOXM1/CDK1/HMGB3/ANXA3/DUSP1/IL7R/FOS	BP
DNA methylation	1/225	71/17910	0.593178	0.661524	0.476427	1	FOS	BP
DNA methylation or demethylation	1/225	89/17910	0.676308	0.727512	0.523951	1	FOS	BP
DNA modification	1/225	114/17910	0.764449	0.800378	0.57643	1	FOS	BP
DNA packaging	7/225	194/17910	0.0114744	0.0625233	0.045029	7	TOP2A/CCNB1/NUSAP1/HMGA1/NCAPH/CDK1/CENPA	BP
DNA packaging complex	2/226	113/18675	0.398051	0.579139	0.425695	2	NCAPH/CENPA	CC
DNA recombination	3/225	244/17910	0.594354	0.662531	0.477153	3	KPNA2/HMGB3/IL7R	BP
DNA repair	3/225	502/17910	0.953534	0.961778	0.692669	3	UBE2T/FOXM1/CDK1	BP
DNA replication	8/225	259/17910	0.0168975	0.0834151	0.0600753	8	ACVRL1/RRM2/HMGA1/CCNA2/RECQL4/CDC6/CDT1/CDK1	BP
DNA replication checkpoint	2/225	11/17910	0.00802	0.0485692	0.0349794	2	CDC6/CDT1	BP
DNA replication initiation	2/225	30/17910	0.054298	0.167388	0.120552	2	CDC6/CDT1	BP
DNA replication-independent nucleosome assembly	1/225	53/17910	0.488817	0.57831	0.416497	1	CENPA	BP
DNA replication-independent nucleosome organization	1/225	53/17910	0.488817	0.57831	0.416497	1	CENPA	BP
DNA secondary structure binding	2/213	23/16967	0.0333801	0.194696	0.156601	2	RECQL4/HMGB3	MF
DNA strand renaturation	1/225	8/17910	0.0962107	0.224003	0.161326	1	RECQL4	BP
DNA topoisomerase activity	1/213	5/16967	0.0612196	0.230339	0.18527	1	TOP2A	MF
DNA topological change	1/225	7/17910	0.0847076	0.207349	0.149332	1	TOP2A	BP
DNA unwinding involved in DNA replication	1/225	8/17910	0.0962107	0.224003	0.161326	1	HMGA1	BP
DNA-binding transcription activator activity, RNA polymerase II-specific	8/213	390/16967	0.118937	0.292245	0.235064	8	FOXF1/MYBL2/FOSB/ETV4/NR4A1/FOS/SOX2/TP63	MF
DNA-binding transcription factor activity	14/213	1663/16967	0.962716	0.977327	0.7861	14	FOXF1/MYBL2/HMGA1/FOXM1/KLF2/MYRF/FOSB/ETV4/ATOH8/NR4A1/FOS/FOXA2/SOX2/TP63	MF
DNA-binding transcription factor activity, RNA polymerase II-specific	14/213	1586/16967	0.94165	0.967804	0.77844	14	FOXF1/MYBL2/HMGA1/FOXM1/KLF2/MYRF/FOSB/ETV4/ATOH8/NR4A1/FOS/FOXA2/SOX2/TP63	MF
DNA-binding transcription repressor activity, RNA polymerase II-specific	1/213	224/16967	0.942082	0.967804	0.77844	1	FOXM1	MF
DNA-dependent ATPase activity	2/213	72/16967	0.228621	0.409191	0.329127	2	TOP2A/RECQL4	MF
DNA-dependent DNA replication	3/225	130/17910	0.224273	0.349702	0.251854	3	HMGA1/CDC6/CDT1	BP
DNA-templated transcription, initiation	3/225	231/17910	0.557165	0.635272	0.457521	3	CCNB1/CDK1/NR4A1	BP
dopamine biosynthetic process	1/225	12/17910	0.140802	0.268154	0.193124	1	AGTR2	BP
dopamine metabolic process	2/225	36/17910	0.0749204	0.193996	0.139716	2	NPR1/AGTR2	BP
dopamine receptor signaling pathway	2/225	34/17910	0.0677983	0.187833	0.135276	2	LRRK2/CAV2	BP
dopaminergic neuron differentiation	2/225	35/17910	0.0713301	0.190736	0.137367	2	VEGFD/FOXA2	BP
dorsal aorta development	1/225	9/17910	0.10757	0.234674	0.169011	1	ACVRL1	BP
dorsal aorta morphogenesis	1/225	8/17910	0.0962107	0.224003	0.161326	1	ACVRL1	BP
dorsal/ventral pattern formation	2/225	89/17910	0.307954	0.426747	0.307341	2	HHIP/EDN1	BP
double-strand break repair	1/225	211/17910	0.93167	0.942083	0.678485	1	FOXM1	BP
double-stranded DNA binding	12/213	744/16967	0.226116	0.408774	0.328792	12	FOXF1/NME1/MYBL2/HMGA1/FOXM1/HMGB3/ETV4/ATOH8/FOS/FOXA2/SOX2/TP63	MF
doxorubicin metabolic process	1/225	9/17910	0.10757	0.234674	0.169011	1	AKR1B10	BP
drug binding	27/213	1658/16967	0.0964965	0.274014	0.220399	27	TEK/ACVRL1/NPR1/UBE2T/TOP2A/NME1/UBE2C/FGFR4/KIF20A/NEK2/FGR/KIF4A/AURKA/RECQL4/AURKB/CDC6/PDK4/TGFBR2/CYP4B1/BUB1B/LRRK2/CDK1/GPT2/PBK/CHI3L2/FBP1/MYH11	MF
drug catabolic process	3/225	109/17910	0.157716	0.288193	0.207555	3	GPX3/CYP4B1/DUOX1	BP
drug metabolic process	18/225	792/17910	0.0112748	0.0617737	0.0444892	18	GPD1/NPR1/PYCR1/CD36/CCNB1/GPX3/AGTR2/PID1/CYP4B1/KLF2/GAPDH/CDK1/PSAT1/DUOX1/EDN1/FBP1/NQO1/AKR1B10	BP
drug transmembrane transport	1/225	70/17910	0.587982	0.658379	0.474162	1	AQP1	BP
drug transmembrane transporter activity	1/213	59/16967	0.526047	0.658379	0.529558	1	AQP1	MF
drug transport	3/225	175/17910	0.377461	0.48727	0.35093	3	RETN/AQP1/EDN1	BP
ductus arteriosus closure	1/225	5/17910	0.0612622	0.17431	0.125538	1	FOXF1	BP
E-box binding	1/213	49/16967	0.462008	0.613971	0.493839	1	ATOH8	MF
ear development	8/225	212/17910	0.00545069	0.0363352	0.0261685	8	CTHRC1/CCNA2/GJB2/EDN1/C1QB/COL11A1/CXCL14/SOX2	BP
ear morphogenesis	3/225	115/17910	0.176087	0.304801	0.219516	3	CTHRC1/EDN1/COL11A1	BP
early endosome	8/226	340/18675	0.0554159	0.1752	0.12878	8	ADRB2/FGD5/ADRB1/AOC3/HSD17B6/LAMP3/ACKR1/STEAP4	CC
early endosome membrane	2/226	148/18675	0.536868	0.704355	0.517735	2	HSD17B6/STEAP4	CC
early endosome to late endosome transport	1/225	38/17910	0.38178	0.49056	0.353299	1	EMP2	BP
elastic fiber assembly	1/225	9/17910	0.10757	0.234674	0.169011	1	MYH11	BP
elastin catabolic process	1/225	5/17910	0.0612622	0.17431	0.125538	1	MMP12	BP
elastin metabolic process	2/225	9/17910	0.00533704	0.0356849	0.0257001	2	HBEGF/MMP12	BP
electron transfer activity	3/213	97/16967	0.122785	0.300475	0.241683	3	HSD17B6/GPX2/STEAP4	MF
electron transport chain	7/225	175/17910	0.00671551	0.0424072	0.0305415	7	GPD1/CCNB1/HSD17B6/CDK1/GPX2/STEAP4/NQO1	BP
embryo development	21/225	968/17910	0.0105555	0.0593817	0.0427665	21	TMEM100/ACVRL1/FOXF1/TOP2A/CCNB1/CTHRC1/NEK2/CCNB2/HYAL1/TGFBR2/KLF2/CDK1/ATOH8/CRABP2/EDN1/COL1A1/COL11A1/FOXA2/SOX2/TP63/DSC3	BP
embryo development ending in birth or egg hatching	14/225	600/17910	0.019696	0.0930837	0.0670386	14	TMEM100/ACVRL1/FOXF1/CCNB1/CTHRC1/NEK2/CCNB2/HYAL1/TGFBR2/KLF2/EDN1/COL1A1/COL11A1/DSC3	BP
embryo implantation	3/225	52/17910	0.0275433	0.117403	0.0845533	3	EMP2/TGFBR2/SPP1	BP
embryonic appendage morphogenesis	2/225	123/17910	0.45894	0.55496	0.39968	2	CRABP2/TP63	BP
embryonic cleavage	1/225	7/17910	0.0847076	0.207349	0.149332	1	TOP2A	BP
embryonic cranial skeleton morphogenesis	1/225	44/17910	0.427039	0.527796	0.380117	1	TGFBR2	BP
embryonic digestive tract development	1/225	34/17910	0.349647	0.462959	0.333421	1	FOXF1	BP
embryonic digestive tract morphogenesis	1/225	18/17910	0.203614	0.330995	0.238381	1	FOXF1	BP
embryonic epithelial tube formation	1/225	120/17910	0.781765	0.815235	0.587129	1	CTHRC1	BP
embryonic foregut morphogenesis	1/225	9/17910	0.10757	0.234674	0.169011	1	FOXF1	BP
embryonic forelimb morphogenesis	2/225	33/17910	0.0643271	0.180482	0.129983	2	CRABP2/TP63	BP
embryonic heart tube development	1/225	75/17910	0.613319	0.677847	0.488183	1	TGFBR2	BP
embryonic heart tube morphogenesis	1/225	65/17910	0.560992	0.637824	0.459359	1	TGFBR2	BP
embryonic hemopoiesis	1/225	21/17910	0.233285	0.357186	0.257244	1	TGFBR2	BP
embryonic hindlimb morphogenesis	1/225	27/17910	0.289363	0.408543	0.294231	1	TP63	BP
embryonic limb morphogenesis	2/225	123/17910	0.45894	0.55496	0.39968	2	CRABP2/TP63	BP
embryonic morphogenesis	11/225	565/17910	0.100817	0.231566	0.166773	11	FOXF1/CTHRC1/HYAL1/TGFBR2/ATOH8/CRABP2/EDN1/COL11A1/FOXA2/SOX2/TP63	BP
embryonic organ development	6/225	413/17910	0.417629	0.522095	0.376011	6	FOXF1/CTHRC1/HYAL1/TGFBR2/EDN1/COL11A1	BP
embryonic organ morphogenesis	6/225	276/17910	0.135264	0.265204	0.190999	6	FOXF1/CTHRC1/HYAL1/TGFBR2/EDN1/COL11A1	BP
embryonic skeletal joint development	1/225	14/17910	0.162269	0.289472	0.208477	1	HYAL1	BP
embryonic skeletal joint morphogenesis	1/225	11/17910	0.129864	0.257699	0.185594	1	HYAL1	BP
embryonic skeletal system development	4/225	117/17910	0.0601265	0.17431	0.125538	4	HYAL1/TGFBR2/COL1A1/COL11A1	BP
embryonic skeletal system morphogenesis	3/225	85/17910	0.0915925	0.221029	0.159184	3	HYAL1/TGFBR2/COL11A1	BP
endocardial cushion development	4/225	45/17910	0.00241375	0.0200378	0.0144311	4	TMEM100/ACVRL1/FOXF1/TGFBR2	BP
endocardial cushion formation	2/225	24/17910	0.0361724	0.135873	0.0978554	2	TMEM100/TGFBR2	BP
endocardial cushion fusion	1/225	4/17910	0.0493163	0.156268	0.112544	1	TGFBR2	BP
endocardial cushion morphogenesis	3/225	35/17910	0.00952383	0.0545965	0.0393202	3	TMEM100/ACVRL1/TGFBR2	BP
endochondral bone growth	2/225	23/17910	0.0334296	0.134721	0.0970259	2	TGFBR2/MMP13	BP
endochondral bone morphogenesis	5/225	52/17910	0.000481083	0.00619954	0.00446489	5	TEK/TGFBR2/COL1A1/ALPL/MMP13	BP
endochondral ossification	3/225	27/17910	0.00458084	0.0320797	0.0231037	3	TEK/COL1A1/ALPL	BP
endocrine hormone secretion	2/225	46/17910	0.113619	0.244146	0.175833	2	RETN/AGTR2	BP
endocrine pancreas development	1/225	43/17910	0.419732	0.522661	0.376419	1	FOXA2	BP
endocrine process	3/225	80/17910	0.0796442	0.202711	0.145992	3	RETN/AGTR2/EDN1	BP
endocrine system development	2/225	122/17910	0.454753	0.552141	0.39765	2	FOXA2/SOX2	BP
endocytic vesicle	10/226	289/18675	0.00282551	0.0188828	0.0138798	10	CD36/SFTPC/MARCO/MSR1/COLEC12/ANXA3/HBEGF/SFTPD/SFTPA1/SFTPB	CC
endocytic vesicle membrane	6/226	161/18675	0.0137324	0.0620601	0.0456172	6	CD36/MARCO/MSR1/COLEC12/ANXA3/HBEGF	CC
endocytosis	18/225	675/17910	0.00223237	0.0191044	0.013759	18	ADRB2/PECAM1/CD36/NME1/CD93/SCARA5/FGR/MARCO/MSR1/MRC1/TGFBR2/LRRK2/CAV2/COLEC12/ANXA3/SFTPD/SFTPA1/PROM2	BP
endocytosis involved in viral entry into host cell	1/225	3/17910	0.037219	0.135873	0.0978554	1	CAV2	BP
endoderm development	2/225	73/17910	0.233504	0.357186	0.257244	2	COL11A1/SOX2	BP
endoderm formation	2/225	50/17910	0.130274	0.257699	0.185594	2	COL11A1/SOX2	BP
endodermal cell differentiation	2/225	45/17910	0.109548	0.237469	0.171025	2	COL11A1/SOX2	BP
endodermal cell fate commitment	1/225	15/17910	0.172801	0.301349	0.21703	1	SOX2	BP
endodermal cell fate specification	1/225	8/17910	0.0962107	0.224003	0.161326	1	SOX2	BP
endomembrane system	77/226	4213/18675	4.67196e-05	0.000774645	0.000569402	77	VEGFD/MCEMP1/TMEM100/STX11/S1PR1/ADRB2/EMP2/GIMAP8/FGD5/PECAM1/ADRB1/RETN/CD36/AOC3/FGFR4/CD93/SELP/VWF/SFTPC/HSD17B6/KIF20A/OSCAR/FGR/LAMP3/OGN/CHRDL1/OLR1/MGAT3/MRC1/C5AR1/CYP4B1/LRRK2/PPBP/A2M/GAPDH/CAV2/CDK1/MYRF/SPP1/SLC2A1/ALOX5AP/ACKR1/ALOX5/DUOX1/ANXA3/MMP11/CRABP2/IL33/AQP1/SEMA3B/LARGE2/SFTPD/DSP/COL10A1/SFTPA1/EDN1/NR4A1/NRGN/COL1A1/B3GNT3/THBS2/COL3A1/FOS/IGFBP3/PERP/COL11A1/COL17A1/L…	CC
endomembrane system organization	7/225	365/17910	0.176915	0.306115	0.220463	7	CAVIN2/CCNB1/CCNB2/LRRK2/CAV2/CDK1/MYRF	BP
endopeptidase activity	4/213	322/16967	0.577947	0.7043	0.566494	4	MMP12/MMP1/MMP13/MMP10	MF
endopeptidase inhibitor activity	7/213	149/16967	0.00277894	0.0477978	0.0384455	7	SPOCK2/A2M/GAPDH/CST1/SLPI/SERPINA1/PI3	MF
endopeptidase regulator activity	7/213	154/16967	0.00333854	0.0515334	0.0414502	7	SPOCK2/A2M/GAPDH/CST1/SLPI/SERPINA1/PI3	MF
endoplasmic reticulum	31/226	1785/18675	0.0256854	0.107721	0.0791805	31	TMEM100/GIMAP8/FGD5/AOC3/FGFR4/VWF/SFTPC/HSD17B6/CHRDL1/CYP4B1/LRRK2/CDK1/MYRF/SPP1/ALOX5AP/DUOX1/CRABP2/SEMA3B/SFTPD/COL10A1/SFTPA1/EDN1/COL1A1/COL3A1/FOS/IGFBP3/COL11A1/COL17A1/SFTPB/SERPINA1/TP63	CC
endoplasmic reticulum exit site	1/226	16/18675	0.177073	0.333839	0.245388	1	LRRK2	CC
endoplasmic reticulum lumen	10/226	306/18675	0.00423221	0.0241589	0.0177579	10	CHRDL1/SPP1/COL10A1/EDN1/COL1A1/COL3A1/IGFBP3/COL11A1/COL17A1/SERPINA1	CC
endoplasmic reticulum membrane	8/226	1005/18675	0.924294	0.993901	0.730566	8	SFTPC/CYP4B1/CDK1/MYRF/ALOX5AP/SFTPD/SFTPA1/SFTPB	CC
endoplasmic reticulum organization	2/225	49/17910	0.126058	0.257699	0.185594	2	LRRK2/CAV2	BP
endoplasmic reticulum part	19/226	1289/18675	0.217196	0.381485	0.28041	19	SFTPC/CHRDL1/CYP4B1/LRRK2/CDK1/MYRF/SPP1/ALOX5AP/SFTPD/COL10A1/SFTPA1/EDN1/COL1A1/COL3A1/IGFBP3/COL11A1/COL17A1/SFTPB/SERPINA1	CC
endoplasmic reticulum subcompartment	8/226	1009/18675	0.92619	0.993901	0.730566	8	SFTPC/CYP4B1/CDK1/MYRF/ALOX5AP/SFTPD/SFTPA1/SFTPB	CC
endoplasmic reticulum-Golgi intermediate compartment	2/226	115/18675	0.406531	0.582175	0.427927	2	GJB2/SERPINA1	CC
endoplasmic reticulum-Golgi intermediate compartment membrane	1/226	70/18675	0.574239	0.730688	0.537092	1	SERPINA1	CC
endosomal part	7/226	504/18675	0.409919	0.583236	0.428707	7	ADRB2/SFTPC/HSD17B6/MRC1/LRRK2/STEAP4/SFTPB	CC
endosomal transport	1/225	188/17910	0.90831	0.921405	0.663593	1	LRRK2	BP
endosome	14/226	852/18675	0.152865	0.303514	0.223098	14	S1PR1/ADRB2/FGD5/ADRB1/AOC3/FGFR4/SFTPC/HSD17B6/LAMP3/MRC1/LRRK2/ACKR1/STEAP4/SFTPB	CC
endosome lumen	2/226	34/18675	0.0635153	0.18514	0.136087	2	SFTPC/SFTPB	CC
endosome membrane	4/226	464/18675	0.816239	0.929292	0.683075	4	ADRB2/HSD17B6/MRC1/STEAP4	CC
endosome to lysosome transport	1/225	49/17910	0.462225	0.556805	0.401009	1	ADRB2	BP
endothelial cell apoptotic process	4/225	65/17910	0.00902965	0.0529477	0.0381327	4	TEK/ECSCR/RGCC/NDNF	BP
endothelial cell chemotaxis	2/225	31/17910	0.0575748	0.17431	0.125538	2	NR4A1/CXCL13	BP
endothelial cell chemotaxis to fibroblast growth factor	1/225	10/17910	0.118787	0.24699	0.177881	1	CXCL13	BP
endothelial cell development	3/225	55/17910	0.0318207	0.130612	0.0940665	3	CDH5/PECAM1/CLDN5	BP
endothelial cell differentiation	7/225	105/17910	0.00036094	0.00527612	0.00379985	7	TMEM100/ACVRL1/S1PR1/CDH5/PECAM1/CLDN5/ATOH8	BP
endothelial cell migration	13/225	275/17910	4.70149e-05	0.00106641	0.000768027	13	TEK/ACVRL1/RGCC/EMP2/PECAM1/CLEC14A/MMRN2/AGTR2/ANXA3/ATOH8/EDN1/NR4A1/CXCL13	BP
endothelial cell morphogenesis	1/225	10/17910	0.118787	0.24699	0.177881	1	PECAM1	BP
endothelial cell proliferation	6/225	185/17910	0.0296057	0.124636	0.0897626	6	TEK/ACVRL1/RGCC/CAV2/ATOH8/NR4A1	BP
endothelial cell-matrix adhesion	2/225	6/17910	0.00227979	0.0191771	0.0138113	2	PECAM1/MMP12	BP
endothelial cell-matrix adhesion via fibronectin	1/225	4/17910	0.0493163	0.156268	0.112544	1	MMP12	BP
endothelial tube morphogenesis	1/225	19/17910	0.213629	0.338705	0.243934	1	ACVRL1	BP
endothelin B receptor binding	1/213	3/16967	0.0371927	0.194696	0.156601	1	EDN1	MF
endothelium development	7/225	124/17910	0.00097692	0.0100247	0.00721978	7	TMEM100/ACVRL1/S1PR1/CDH5/PECAM1/CLDN5/ATOH8	BP
energy derivation by oxidation of organic compounds	4/225	264/17910	0.424262	0.527265	0.379734	4	GPD1/CCNB1/PID1/CDK1	BP
energy homeostasis	1/225	34/17910	0.349647	0.462959	0.333421	1	CD36	BP
energy reserve metabolic process	1/225	83/17910	0.650672	0.708531	0.510281	1	PID1	BP
enhancer binding	1/213	121/16967	0.784348	0.863027	0.694164	1	HMGA1	MF
enhancer sequence-specific DNA binding	1/213	107/16967	0.742317	0.841572	0.676907	1	HMGA1	MF
ensheathment of neurons	2/225	126/17910	0.471389	0.564775	0.406749	2	PRX/MYRF	BP
entry into cell of other organism involved in symbiotic interaction	5/225	134/17910	0.0271352	0.11611	0.0836223	5	MRC1/HYAL1/CAV2/CDK1/NECTIN4	BP
entry into host	5/225	134/17910	0.0271352	0.11611	0.0836223	5	MRC1/HYAL1/CAV2/CDK1/NECTIN4	BP
entry into host cell	5/225	134/17910	0.0271352	0.11611	0.0836223	5	MRC1/HYAL1/CAV2/CDK1/NECTIN4	BP
entry into other organism involved in symbiotic interaction	5/225	134/17910	0.0271352	0.11611	0.0836223	5	MRC1/HYAL1/CAV2/CDK1/NECTIN4	BP
envelope	10/226	1093/18675	0.858004	0.953582	0.700929	10	NME1/FGR/LRRK2/GAPDH/ALOX5AP/ALOX5/AQP1/NR4A1/NRGN/CLCA2	CC
enzyme activator activity	5/213	419/16967	0.607814	0.731808	0.58862	5	RGCC/CCNB1/LRRK2/ALOX5AP/IGFBP3	MF
enzyme binding	42/213	1941/16967	0.00028503	0.010685	0.00859435	42	ANKRD1/LDB2/ACVRL1/RGCC/NPR1/ADRB2/CDH5/SH2D3C/EMP2/FGD5/ADRB1/UBE2T/TOP2A/NME1/UBE2C/CCNB1/TPX2/VWF/KIF20A/NEK2/FGR/HMGA1/AURKA/CCNA2/KPNA2/AURKB/CDC6/TGFBR2/LRRK2/PRC1/FOXM1/DOK2/A2M/SLC2A1/CSF3/DUSP1/DSP/COL1A1/COL3A1/SFN/SLPI/SERPINA1	MF
enzyme inhibitor activity	9/213	332/16967	0.0246632	0.185591	0.149277	9	SPOCK2/LRRK2/A2M/GAPDH/CST1/SFN/SLPI/SERPINA1/PI3	MF
enzyme linked receptor protein signaling pathway	29/225	968/17910	1.25804e-05	0.000416185	0.000299735	29	TEK/VEGFD/GDF10/TMEM100/ACVRL1/NPR1/ADRB2/CDH5/HHIP/MMRN2/FGFR4/CLDN5/LRRC32/CHRDL1/AGTR2/PID1/PDK4/TGFBR2/DOK2/CAV2/LTBP4/FERMT1/ATOH8/HBEGF/CDH3/GPRC5A/COL3A1/FOS/IGFBP3	BP
enzyme regulator activity	13/213	840/16967	0.257803	0.426367	0.342942	13	RGCC/SPOCK2/CCNB1/LRRK2/A2M/GAPDH/ALOX5AP/IGFBP3/CST1/SFN/SLPI/SERPINA1/PI3	MF
epiboly	3/225	32/17910	0.0074188	0.0459323	0.0330803	3	ACVRL1/HBEGF/MMP12	BP
epiboly involved in wound healing	3/225	31/17910	0.00678532	0.0424849	0.0305975	3	ACVRL1/HBEGF/MMP12	BP
epidermal cell differentiation	14/225	346/17910	0.000128026	0.00226112	0.00162845	14	DSP/CDH3/PERP/ALOX15B/SFN/KRT15/KRT17/PKP1/DSG3/TP63/DSC3/SPRR2D/SPRR3/PI3	BP
epidermal cell division	2/225	3/17910	0.000467482	0.00614543	0.00442592	2	SFN/TP63	BP
epidermal growth factor receptor signaling pathway	2/225	115/17910	0.424941	0.527517	0.379916	2	HBEGF/GPRC5A	BP
epidermis development	18/225	452/17910	1.72418e-05	0.000516438	0.000371937	18	LDB2/FERMT1/CRABP2/DSP/CDH3/PERP/ALOX15B/SFN/COL17A1/KRT15/KRT17/PKP1/DSG3/TP63/DSC3/SPRR2D/SPRR3/PI3	BP
epidermis morphogenesis	2/225	28/17910	0.0479545	0.156268	0.112544	2	KRT17/TP63	BP
epididymis development	1/225	4/17910	0.0493163	0.156268	0.112544	1	GJB2	BP
epithelial cell apoptotic process	5/225	111/17910	0.0130928	0.0695095	0.0500605	5	TEK/ECSCR/RGCC/TGFBR2/NDNF	BP
epithelial cell development	5/225	199/17910	0.106423	0.234674	0.169011	5	CDH5/PECAM1/CLDN5/SFN/TP63	BP
epithelial cell differentiation	24/225	746/17910	2.41395e-05	0.000660558	0.000475731	24	TMEM100/ACVRL1/S1PR1/CDH5/FOXF1/PECAM1/CLDN5/KLF2/CDK1/ATOH8/DSP/CDH3/PERP/ALOX15B/SFN/KRT15/KRT17/PKP1/DSG3/TP63/DSC3/SPRR2D/SPRR3/PI3	BP
epithelial cell differentiation involved in mammary gland alveolus development	1/225	4/17910	0.0493163	0.156268	0.112544	1	FOXF1	BP
epithelial cell differentiation involved in prostate gland development	1/225	9/17910	0.10757	0.234674	0.169011	1	TP63	BP
epithelial cell migration	17/225	354/17910	2.58085e-06	0.000117947	8.49453e-05	17	TEK/ACVRL1/RGCC/EMP2/PECAM1/CLEC14A/MMRN2/AGTR2/HYAL1/TGFBR2/ANXA3/FERMT1/ATOH8/HBEGF/EDN1/NR4A1/CXCL13	BP
epithelial cell morphogenesis	1/225	31/17910	0.324461	0.442021	0.318342	1	PECAM1	BP
epithelial cell proliferation	17/225	425/17910	2.80846e-05	0.000720439	0.000518858	17	TEK/ACVRL1/RGCC/CPB2/NME1/HYAL1/C5AR1/CAV2/FERMT1/ATOH8/MMP12/NR4A1/CDH3/IGFBP3/SFN/SOX2/TP63	BP
epithelial cell proliferation involved in liver morphogenesis	1/225	18/17910	0.203614	0.330995	0.238381	1	CPB2	BP
epithelial fluid transport	2/225	8/17910	0.00418556	0.0299751	0.021588	2	AQP1/EDN1	BP
epithelial structure maintenance	1/225	25/17910	0.27114	0.391293	0.281808	1	LDB2	BP
epithelial to mesenchymal transition	5/225	140/17910	0.0319374	0.13097	0.0943241	5	TMEM100/RGCC/TGFBR2/COL1A1/FOXA2	BP
epithelial to mesenchymal transition involved in endocardial cushion formation	2/225	17/17910	0.0188748	0.0901639	0.0649357	2	TMEM100/TGFBR2	BP
epithelial tube branching involved in lung morphogenesis	2/225	29/17910	0.0510905	0.160286	0.115438	2	FOXF1/HHIP	BP
epithelial tube formation	1/225	128/17910	0.802897	0.832571	0.599615	1	CTHRC1	BP
epithelial tube morphogenesis	7/225	313/17910	0.100566	0.231108	0.166443	7	ACVRL1/FOXF1/HHIP/CTHRC1/AGTR2/TGFBR2/EDN1	BP
epithelium development	33/225	1251/17910	4.05182e-05	0.00095541	0.000688083	33	TMEM100/LDB2/ACVRL1/S1PR1/CDH5/FOXF1/PECAM1/HHIP/CLDN5/CTHRC1/AGTR2/TGFBR2/KLF2/CDK1/FERMT1/ATOH8/HBEGF/DSP/MMP12/EDN1/CDH3/PERP/ALOX15B/SFN/KRT15/KRT17/PKP1/DSG3/TP63/DSC3/SPRR2D/SPRR3/PI3	BP
epithelium migration	17/225	357/17910	2.89122e-06	0.000129462	9.32384e-05	17	TEK/ACVRL1/RGCC/EMP2/PECAM1/CLEC14A/MMRN2/AGTR2/HYAL1/TGFBR2/ANXA3/FERMT1/ATOH8/HBEGF/EDN1/NR4A1/CXCL13	BP
ER to Golgi vesicle-mediated transport	2/225	172/17910	0.638987	0.69838	0.502971	2	LRRK2/SERPINA1	BP
ERBB signaling pathway	2/225	138/17910	0.519418	0.604972	0.435699	2	HBEGF/GPRC5A	BP
ERBB2 signaling pathway	1/225	32/17910	0.332963	0.448639	0.323109	1	HBEGF	BP
ERK1 and ERK2 cascade	7/225	289/17910	0.0729474	0.190736	0.137367	7	TEK/AGER/CD36/FGFR4/MARCO/C5AR1/DUSP1	BP
erythrocyte development	1/225	33/17910	0.341358	0.456344	0.328658	1	KLF2	BP
erythrocyte differentiation	1/225	112/17910	0.758378	0.795337	0.572799	1	KLF2	BP
erythrocyte homeostasis	1/225	120/17910	0.781765	0.815235	0.587129	1	KLF2	BP
erythrocyte maturation	1/225	15/17910	0.172801	0.301349	0.21703	1	KLF2	BP
establishment of apical/basal cell polarity	1/225	18/17910	0.203614	0.330995	0.238381	1	FOXF1	BP
establishment of cell polarity	4/225	126/17910	0.0745757	0.193996	0.139716	4	CDH5/FOXF1/CENPA/FERMT1	BP
establishment of chromosome localization	3/225	72/17910	0.0620857	0.175976	0.126737	3	CCNB1/DLGAP5/CDT1	BP
establishment of endothelial barrier	2/225	40/17910	0.0898271	0.217479	0.156627	2	CDH5/CLDN5	BP
establishment of epithelial cell apical/basal polarity	1/225	14/17910	0.162269	0.289472	0.208477	1	FOXF1	BP
establishment of epithelial cell polarity	2/225	29/17910	0.0510905	0.160286	0.115438	2	FOXF1/FERMT1	BP
establishment of integrated proviral latency	1/225	8/17910	0.0962107	0.224003	0.161326	1	HMGA1	BP
establishment of localization	85/225	4908/17910	0.000421882	0.00580809	0.00418297	85	ANKRD1/VEGFD/MCEMP1/AGER/FHL1/RGCC/NPR1/FABP4/ADRB2/EMP2/FOXF1/PECAM1/CPB2/RETN/SCN7A/CD36/NME1/SLC39A8/CCNB1/LRRC32/CD93/IL1RL1/SELP/VWF/NUSAP1/KIF20A/OSCAR/SLC46A2/CEP55/SCARA5/CACNA2D2/AQP4/FGR/HMGA1/OLR1/MARCO/KIF4A/DLGAP5/MSR1/LPL/MRC1/AGTR2/KPNA2/PID1/TGFBR2/C5AR1/LRRK2/CDT1/PPBP/SUSD2/A2M/GAPDH/CAV2/SPP1/PRG4/CENPA/SLC2A1/COLEC12/ALOX5/ANXA3/LTBP4/FERMT1/IL33/AQP1/SLC7A5/SFTPD/DSP/SFTPA1/M…	BP
establishment of localization in cell	22/225	1919/17910	0.707624	0.752254	0.541771	22	ADRB2/EMP2/FOXF1/CD36/CCNB1/NUSAP1/FGR/HMGA1/KIF4A/DLGAP5/AGTR2/KPNA2/LRRK2/CDT1/CENPA/FERMT1/MMP12/CDH3/FOXA2/SFN/SERPINA1/TP63	BP
establishment of melanosome localization	1/225	21/17910	0.233285	0.357186	0.257244	1	CDH3	BP
establishment of mitotic spindle localization	2/225	28/17910	0.0479545	0.156268	0.112544	2	NUSAP1/CENPA	BP
establishment of mitotic spindle orientation	1/225	24/17910	0.261854	0.383102	0.275909	1	CENPA	BP
establishment of monopolar cell polarity	1/225	20/17910	0.223519	0.349263	0.251538	1	FOXF1	BP
establishment of organelle localization	10/225	448/17910	0.057129	0.17431	0.125538	10	FOXF1/CCNB1/NUSAP1/FGR/DLGAP5/LRRK2/CDT1/CENPA/CDH3/SERPINA1	BP
establishment of pigment granule localization	1/225	22/17910	0.242928	0.364187	0.262286	1	CDH3	BP
establishment of planar polarity	2/225	123/17910	0.45894	0.55496	0.39968	2	CTHRC1/TP63	BP
establishment of planar polarity involved in neural tube closure	1/225	12/17910	0.140802	0.268154	0.193124	1	CTHRC1	BP
establishment of planar polarity of embryonic epithelium	1/225	14/17910	0.162269	0.289472	0.208477	1	CTHRC1	BP
establishment of protein localization	25/225	1803/17910	0.331359	0.448523	0.323025	25	ANKRD1/AGER/RGCC/CD36/LRRC32/IL1RL1/KIF20A/CEP55/CACNA2D2/FGR/LPL/AGTR2/KPNA2/LRRK2/GAPDH/SLC2A1/FERMT1/IL33/MMP12/COL1A1/SELENBP1/FOXA2/ALOX15B/SFN/TP63	BP
establishment of protein localization to membrane	2/225	287/17910	0.878501	0.896293	0.645507	2	SFN/TP63	BP
establishment of protein localization to mitochondrion	3/225	121/17910	0.195017	0.323424	0.232929	3	LRRK2/SFN/TP63	BP
establishment of protein localization to organelle	8/225	452/17910	0.209743	0.338106	0.243503	8	CD36/AGTR2/KPNA2/LRRK2/FERMT1/MMP12/SFN/TP63	BP
establishment of RNA localization	1/225	179/17910	0.897139	0.910698	0.655882	1	TGFBR2	BP
establishment of skin barrier	2/225	23/17910	0.0334296	0.134721	0.0970259	2	SFN/TP63	BP
establishment of spindle localization	2/225	36/17910	0.0749204	0.193996	0.139716	2	NUSAP1/CENPA	BP
establishment of spindle orientation	1/225	28/17910	0.298305	0.416728	0.300126	1	CENPA	BP
establishment of synaptic vesicle localization	1/225	126/17910	0.797813	0.829239	0.597215	1	LRRK2	BP
establishment of tissue polarity	2/225	123/17910	0.45894	0.55496	0.39968	2	CTHRC1/TP63	BP
establishment of vesicle localization	3/225	253/17910	0.618892	0.682305	0.491393	3	LRRK2/CDH3/SERPINA1	BP
establishment of viral latency	1/225	9/17910	0.10757	0.234674	0.169011	1	HMGA1	BP
establishment or maintenance of apical/basal cell polarity	1/225	34/17910	0.349647	0.462959	0.333421	1	FOXF1	BP
establishment or maintenance of bipolar cell polarity	1/225	34/17910	0.349647	0.462959	0.333421	1	FOXF1	BP
establishment or maintenance of cell polarity	7/225	172/17910	0.00612598	0.0395867	0.0285102	7	TEK/CDH5/FOXF1/SPN/CENPA/FERMT1/AQP1	BP
establishment or maintenance of cytoskeleton polarity	1/225	6/17910	0.0730587	0.190736	0.137367	1	AQP1	BP
establishment or maintenance of epithelial cell apical/basal polarity	1/225	30/17910	0.315852	0.434297	0.312779	1	FOXF1	BP
establishment or maintenance of monopolar cell polarity	1/225	21/17910	0.233285	0.357186	0.257244	1	FOXF1	BP
estradiol 17-beta-dehydrogenase activity	1/213	11/16967	0.129778	0.305966	0.2461	1	HSD17B6	MF
estradiol secretion	1/225	3/17910	0.037219	0.135873	0.0978554	1	SPP1	BP
excitatory postsynaptic potential	2/225	95/17910	0.335625	0.451266	0.325	2	ADRB2/LRRK2	BP
excretion	3/225	64/17910	0.0465964	0.156268	0.112544	3	NPR1/AGTR2/EDN1	BP
execution phase of apoptosis	1/225	65/17910	0.560992	0.637824	0.459359	1	TOP2A	BP
exit from host	1/225	35/17910	0.357833	0.470007	0.338498	1	CAV2	BP
exit from host cell	1/225	35/17910	0.357833	0.470007	0.338498	1	CAV2	BP
exit from mitosis	2/225	28/17910	0.0479545	0.156268	0.112544	2	RGCC/UBE2C	BP
exocytic vesicle	1/226	166/18675	0.868688	0.957187	0.70358	1	LRRK2	CC
exocytic vesicle membrane	1/226	87/18675	0.654145	0.793078	0.582952	1	LRRK2	CC
exocytosis	23/225	862/17910	0.00055365	0.00679869	0.0048964	23	VEGFD/MCEMP1/FOXF1/PECAM1/RETN/CD36/CD93/SELP/VWF/OSCAR/FGR/OLR1/C5AR1/LRRK2/PPBP/A2M/ALOX5/ANXA3/DSP/LYZ/SLPI/SERPINA1/PKP1	BP
exogenous drug catabolic process	1/225	12/17910	0.140802	0.268154	0.193124	1	CYP4B1	BP
exploration behavior	2/225	25/17910	0.0389988	0.139872	0.100735	2	AGTR2/LRRK2	BP
external side of plasma membrane	10/226	199/18675	0.000160972	0.00236284	0.0017368	10	S1PR1/CDH5/PECAM1/CLEC14A/CD36/IL1RL1/SELP/AQP4/TGFBR2/IL7R	CC
extracellular exosome	50/226	2162/18675	4.35835e-06	0.000111955	8.22925e-05	50	GPD1/SEMA3G/LYVE1/FABP4/GPA33/PECAM1/CPB2/RETN/MMRN2/NME1/SPN/VWF/OSCAR/GPX3/FGR/OGN/PEBP4/HYAL1/LRRK2/SUSD2/A2M/GAPDH/CDK1/SPP1/PSAT1/SLC2A1/NECTIN4/ANXA3/LAD1/CRABP2/AQP1/SLC7A5/C7/DSP/PROM2/FBP1/SELENBP1/GPRC5A/ALPL/MYH11/ALOX15B/SFN/LYZ/STEAP4/SLPI/KRT15/SERPINA1/KRT17/DSG3/SPRR3	CC
extracellular matrix	30/226	468/18675	8.50448e-14	1.16511e-11	8.56417e-12	30	GDF10/SPOCK2/CLEC14A/MMRN2/VWF/CTHRC1/OGN/A2M/PRG4/LTBP4/LAD1/MMP11/NDNF/SEMA3B/COL10A1/MMP12/MMP1/COL1A1/C1QA/THBS2/C1QB/ALPL/COL3A1/COL11A1/COL17A1/SLPI/SERPINA1/MMP13/MMP10/PI3	CC
extracellular matrix assembly	2/225	28/17910	0.0479545	0.156268	0.112544	2	RGCC/MYH11	BP
extracellular matrix binding	1/213	43/16967	0.419524	0.576471	0.463676	1	COL11A1	MF
extracellular matrix component	3/226	47/18675	0.0191848	0.0847843	0.0623207	3	COL1A1/COL3A1/COL11A1	CC
extracellular matrix constituent secretion	2/225	11/17910	0.00802	0.0485692	0.0349794	2	RGCC/CPB2	BP
extracellular matrix disassembly	7/225	78/17910	5.57592e-05	0.00121142	0.000872461	7	FGFR4/A2M/MMP11/MMP12/MMP1/MMP13/MMP10	BP
extracellular matrix organization	21/225	334/17910	1.53045e-09	3.67934e-07	2.64985e-07	21	RGCC/FOXF1/PECAM1/SPOCK2/CPB2/FGFR4/VWF/A2M/SPP1/FERMT1/MMP11/NDNF/COL10A1/MMP12/MMP1/COL1A1/MYH11/COL3A1/COL11A1/MMP13/MMP10	BP
extracellular matrix protein binding	1/213	3/16967	0.0371927	0.194696	0.156601	1	CLEC14A	MF
extracellular matrix structural constituent	12/213	158/16967	7.42406e-07	0.000148976	0.000119827	12	MMRN2/VWF/CTHRC1/OGN/PRG4/LTBP4/COL10A1/COL1A1/THBS2/COL3A1/COL11A1/COL17A1	MF
extracellular matrix structural constituent conferring compression resistance	2/213	21/16967	0.0281627	0.194696	0.156601	2	OGN/PRG4	MF
extracellular matrix structural constituent conferring tensile strength	5/213	41/16967	0.000154322	0.00774184	0.00622704	5	COL10A1/COL1A1/COL3A1/COL11A1/COL17A1	MF
extracellular membrane-bounded organelle	2/226	5/18675	0.00142345	0.0110384	0.0081138	2	AQP1/ALPL	CC
extracellular organelle	50/226	2187/18675	6.02304e-06	0.000130288	9.5768e-05	50	GPD1/SEMA3G/LYVE1/FABP4/GPA33/PECAM1/CPB2/RETN/MMRN2/NME1/SPN/VWF/OSCAR/GPX3/FGR/OGN/PEBP4/HYAL1/LRRK2/SUSD2/A2M/GAPDH/CDK1/SPP1/PSAT1/SLC2A1/NECTIN4/ANXA3/LAD1/CRABP2/AQP1/SLC7A5/C7/DSP/PROM2/FBP1/SELENBP1/GPRC5A/ALPL/MYH11/ALOX15B/SFN/LYZ/STEAP4/SLPI/KRT15/SERPINA1/KRT17/DSG3/SPRR3	CC
extracellular region	111/226	4295/18675	5.8193e-18	2.39173e-15	1.75804e-15	111	GPD1/TEK/VEGFD/GDF10/SEMA3G/AGER/LYVE1/FABP4/GPA33/PECAM1/HHIP/SPOCK2/CPB2/RETN/CCL23/CLEC14A/CD36/MMRN2/NME1/SPN/FGFR4/IL1RL1/SELP/TPX2/VWF/SFTPC/KIF20A/OSCAR/CEP55/GPX3/CTHRC1/FGR/OGN/PEBP4/CHRDL1/OLR1/KIF4A/MSR1/LPL/HYAL1/LRRK2/CD52/PPBP/SUSD2/A2M/GAPDH/CDK1/SPP1/PSAT1/PRG4/SLC2A1/NECTIN4/ALOX5/ANXA3/LTBP4/CSF3/LAD1/MMP11/CRABP2/IL33/NDNF/AQP1/SLC7A5/SEMA3B/HBEGF/CHI3L2/C7/SFTPD/DSP/IL7R/COL10…	CC
extracellular region part	89/226	3312/18675	1.11012e-14	2.2813e-12	1.67687e-12	89	GPD1/GDF10/SEMA3G/LYVE1/FABP4/GPA33/PECAM1/SPOCK2/CPB2/RETN/CLEC14A/CD36/MMRN2/NME1/SPN/SELP/TPX2/VWF/SFTPC/KIF20A/OSCAR/CEP55/GPX3/CTHRC1/FGR/OGN/PEBP4/KIF4A/MSR1/LPL/HYAL1/LRRK2/SUSD2/A2M/GAPDH/CDK1/SPP1/PSAT1/PRG4/SLC2A1/NECTIN4/ALOX5/ANXA3/LTBP4/LAD1/MMP11/CRABP2/IL33/NDNF/AQP1/SLC7A5/SEMA3B/HBEGF/CHI3L2/C7/DSP/COL10A1/MMP12/PROM2/EDN1/FBP1/MMP1/COL1A1/C1QA/THBS2/SELENBP1/C1QB/GPRC5A/ALPL/MYH…	CC
extracellular space	70/226	3051/18675	3.05377e-08	1.56887e-06	1.1532e-06	70	GPD1/SEMA3G/LYVE1/FABP4/GPA33/PECAM1/CPB2/RETN/CD36/MMRN2/NME1/SPN/SELP/VWF/SFTPC/OSCAR/GPX3/CTHRC1/FGR/OGN/PEBP4/MSR1/LPL/HYAL1/LRRK2/SUSD2/A2M/GAPDH/CDK1/SPP1/PSAT1/SLC2A1/NECTIN4/ALOX5/ANXA3/LTBP4/LAD1/CRABP2/IL33/AQP1/SLC7A5/HBEGF/CHI3L2/C7/DSP/MMP12/PROM2/EDN1/FBP1/COL1A1/C1QA/SELENBP1/C1QB/GPRC5A/ALPL/MYH11/COL3A1/IGFBP3/CST1/ALOX15B/SFN/LYZ/STEAP4/SLPI/KRT15/CXCL14/SERPINA1/KRT17/DSG3/SPRR3	CC
extracellular structure organization	24/225	387/17910	1.28209e-10	9.12519e-08	6.57193e-08	24	RGCC/FOXF1/PECAM1/SPOCK2/CPB2/CD36/FGFR4/VWF/LPL/HYAL1/A2M/SPP1/FERMT1/MMP11/NDNF/COL10A1/MMP12/MMP1/COL1A1/MYH11/COL3A1/COL11A1/MMP13/MMP10	BP
extracellular vesicle	50/226	2185/18675	5.87068e-06	0.000130288	9.5768e-05	50	GPD1/SEMA3G/LYVE1/FABP4/GPA33/PECAM1/CPB2/RETN/MMRN2/NME1/SPN/VWF/OSCAR/GPX3/FGR/OGN/PEBP4/HYAL1/LRRK2/SUSD2/A2M/GAPDH/CDK1/SPP1/PSAT1/SLC2A1/NECTIN4/ANXA3/LAD1/CRABP2/AQP1/SLC7A5/C7/DSP/PROM2/FBP1/SELENBP1/GPRC5A/ALPL/MYH11/ALOX15B/SFN/LYZ/STEAP4/SLPI/KRT15/SERPINA1/KRT17/DSG3/SPRR3	CC
extrinsic apoptotic signaling pathway	2/225	213/17910	0.750716	0.788794	0.568087	2	AGTR2/IL33	BP
extrinsic component of cytoplasmic side of plasma membrane	2/226	54/18675	0.138908	0.291282	0.214107	2	MYZAP/CAV2	CC
extrinsic component of membrane	4/226	199/18675	0.221558	0.38585	0.283619	4	MYZAP/KPNA2/CAV2/ALOX15B	CC
extrinsic component of plasma membrane	3/226	102/18675	0.126539	0.275631	0.202602	3	MYZAP/KPNA2/CAV2	CC
extrinsic component of postsynaptic membrane	1/226	8/18675	0.0928277	0.227096	0.166927	1	KPNA2	CC
extrinsic component of postsynaptic specialization membrane	1/226	6/18675	0.0704579	0.193631	0.142328	1	KPNA2	CC
extrinsic component of synaptic membrane	1/226	12/18675	0.135972	0.288064	0.211741	1	KPNA2	CC
eye development	4/225	342/17910	0.625931	0.687842	0.495381	4	ACVRL1/CHRDL1/TGFBR2/SOX2	BP
face development	2/225	46/17910	0.113619	0.244146	0.175833	2	CLDN5/COL1A1	BP
face morphogenesis	2/225	30/17910	0.054298	0.167388	0.120552	2	CLDN5/COL1A1	BP
FAD binding	1/213	25/16967	0.270981	0.444498	0.357526	1	STEAP4	MF
fascia adherens	1/226	10/18675	0.114661	0.258671	0.190136	1	DSP	CC
fat cell differentiation	9/225	222/17910	0.00202538	0.0177177	0.0127602	9	GDF10/FABP4/ADRB2/ADRB1/RETN/LPL/MMP11/NR4A1/STEAP4	BP
fat cell proliferation	1/225	10/17910	0.118787	0.24699	0.177881	1	PID1	BP
fatty acid binding	2/213	28/16967	0.0478857	0.209887	0.16882	2	FABP4/ALOX5AP	MF
fatty acid biosynthetic process	6/225	144/17910	0.00976193	0.0557663	0.0401627	6	LPL/PDK4/ALOX5AP/ALOX5/EDN1/ALOX15B	BP
fatty acid derivative binding	1/213	23/16967	0.252301	0.420734	0.338412	1	ALOX5AP	MF
fatty acid derivative biosynthetic process	3/225	96/17910	0.120251	0.249916	0.179989	3	ALOX5AP/ALOX5/EDN1	BP
fatty acid derivative metabolic process	4/225	154/17910	0.129292	0.257699	0.185594	4	ALOX5AP/ALOX5/EDN1/ALOX15B	BP
fatty acid derivative transport	2/225	43/17910	0.101527	0.232234	0.167254	2	AGTR2/EDN1	BP
fatty acid metabolic process	7/225	339/17910	0.136078	0.266681	0.192063	7	CD36/LPL/PDK4/ALOX5AP/ALOX5/EDN1/ALOX15B	BP
fatty acid oxidation	1/225	93/17910	0.69235	0.740634	0.533402	1	PDK4	BP
fatty acid transport	4/225	90/17910	0.0267887	0.115408	0.0831162	4	FABP4/CD36/AGTR2/EDN1	BP
Fc receptor mediated stimulatory signaling pathway	1/225	142/17910	0.835092	0.859523	0.619025	1	FGR	BP
Fc receptor signaling pathway	2/225	241/17910	0.808818	0.837731	0.603331	2	FGR/FOS	BP
Fc-epsilon receptor signaling pathway	1/225	169/17910	0.883132	0.90035	0.648429	1	FOS	BP
Fc-gamma receptor signaling pathway	1/225	141/17910	0.832977	0.857545	0.617601	1	FGR	BP
Fc-gamma receptor signaling pathway involved in phagocytosis	1/225	139/17910	0.828666	0.854098	0.615119	1	FGR	BP
fear response	1/225	39/17910	0.389563	0.497675	0.358424	1	ADRB1	BP
feeding behavior	2/225	98/17910	0.349343	0.462959	0.333421	2	RETN/FOS	BP
female gamete generation	4/225	132/17910	0.0850965	0.208071	0.149852	4	TOP2A/CCNB1/AURKA/NCAPH	BP
female genitalia development	1/225	17/17910	0.193473	0.321584	0.231604	1	TP63	BP
female genitalia morphogenesis	1/225	3/17910	0.037219	0.135873	0.0978554	1	TP63	BP
female germ cell nucleus	1/226	4/18675	0.0475391	0.15795	0.116101	1	AURKA	CC
female gonad development	1/225	95/17910	0.700071	0.746013	0.537276	1	RETN	BP
female meiosis chromosome segregation	1/225	6/17910	0.0730587	0.190736	0.137367	1	NCAPH	BP
female meiosis I	1/225	7/17910	0.0847076	0.207349	0.149332	1	AURKA	BP
female meiotic nuclear division	3/225	30/17910	0.00618525	0.0397957	0.0286607	3	TOP2A/AURKA/NCAPH	BP
female pregnancy	7/225	193/17910	0.011176	0.0613793	0.0442052	7	EMP2/TGFBR2/SPP1/SLC2A1/FOSB/GJB2/FOS	BP
female pronucleus	2/226	9/18675	0.00496314	0.027198	0.0199919	2	CCNA2/SLC2A1	CC
female sex differentiation	2/225	114/17910	0.420613	0.522877	0.376574	2	RETN/TP63	BP
ferric iron binding	1/213	6/16967	0.0730083	0.246916	0.198603	1	RRM2	MF
fertilization	1/225	170/17910	0.884614	0.901079	0.648954	1	CDK1	BP
fibrillar center	4/226	131/18675	0.0749499	0.198061	0.145584	4	ANKRD1/AGER/ZNF385B/SELENBP1	CC
fibrillar collagen trimer	3/226	11/18675	0.000268604	0.00324694	0.00238666	3	COL1A1/COL3A1/COL11A1	CC
fibrinolysis	1/225	25/17910	0.27114	0.391293	0.281808	1	CPB2	BP
fibroblast activation	1/225	11/17910	0.129864	0.257699	0.185594	1	RGCC	BP
fibroblast apoptotic process	1/225	24/17910	0.261854	0.383102	0.275909	1	TP63	BP
fibroblast growth factor binding	2/213	21/16967	0.0281627	0.194696	0.156601	2	FGFR4/CXCL13	MF
fibroblast growth factor production	1/225	9/17910	0.10757	0.234674	0.169011	1	RGCC	BP
fibroblast growth factor receptor signaling pathway	2/225	109/17910	0.398732	0.505601	0.364132	2	HHIP/FGFR4	BP
fibroblast growth factor-activated receptor activity	1/213	5/16967	0.0612196	0.230339	0.18527	1	FGFR4	MF
fibroblast migration	1/225	43/17910	0.419732	0.522661	0.376419	1	TNS1	BP
fibroblast proliferation	5/225	87/17910	0.00480082	0.0329601	0.0237378	5	CCNB1/CCNA2/AGTR2/CDC6/AQP1	BP
ficolin-1-rich granule	5/226	185/18675	0.0745843	0.198061	0.145584	5	CD93/ALOX5/DSP/SERPINA1/PKP1	CC
ficolin-1-rich granule lumen	2/226	124/18675	0.443948	0.614353	0.451579	2	ALOX5/SERPINA1	CC
ficolin-1-rich granule membrane	3/226	61/18675	0.0376843	0.142094	0.104446	3	CD93/DSP/PKP1	CC
filopodium assembly	1/225	58/17910	0.520224	0.604972	0.435699	1	FGD5	BP
flavin adenine dinucleotide binding	1/213	67/16967	0.571767	0.698182	0.561574	1	STEAP4	MF
Flemming body	1/226	28/18675	0.289058	0.456933	0.335869	1	CEP55	CC
fluid transport	3/225	26/17910	0.00410955	0.029914	0.021544	3	AQP4/AQP1/EDN1	BP
foam cell differentiation	4/225	36/17910	0.00104212	0.0105956	0.00763094	4	CD36/MSR1/LPL/ALOX15B	BP
focal adhesion	8/226	397/18675	0.110191	0.254937	0.187391	8	TEK/FHL1/ARHGAP31/TNS1/HMGA1/CAV2/FERMT1/TNS4	CC
focal adhesion assembly	2/225	81/17910	0.270751	0.391293	0.281808	2	TEK/ACVRL1	BP
forebrain cell migration	1/225	60/17910	0.532242	0.614915	0.44286	1	LRRK2	BP
forebrain development	8/225	371/17910	0.0968905	0.224407	0.161617	8	NME1/LRRK2/SLC2A1/ANXA3/AQP1/NRGN/COL3A1/SOX2	BP
foregut morphogenesis	1/225	9/17910	0.10757	0.234674	0.169011	1	FOXF1	BP
forelimb morphogenesis	2/225	41/17910	0.0936806	0.224003	0.161326	2	CRABP2/TP63	BP
formation of primary germ layer	4/225	117/17910	0.0601265	0.17431	0.125538	4	FOXF1/ATOH8/COL11A1/SOX2	BP
four-way junction DNA binding	1/213	16/16967	0.183086	0.36137	0.290663	1	HMGB3	MF
free ubiquitin chain polymerization	1/225	6/17910	0.0730587	0.190736	0.137367	1	UBE2C	BP
frizzled binding	1/213	22/16967	0.242782	0.416396	0.334923	1	CTHRC1	MF
fructose 6-phosphate metabolic process	1/225	6/17910	0.0730587	0.190736	0.137367	1	FBP1	BP
fucose binding	1/213	5/16967	0.0612196	0.230339	0.18527	1	SELP	MF
G protein-coupled amine receptor activity	2/213	27/16967	0.0448275	0.209887	0.16882	2	ADRB2/ADRB1	MF
G protein-coupled neurotransmitter receptor activity	1/213	22/16967	0.242782	0.416396	0.334923	1	ADRB1	MF
G protein-coupled peptide receptor activity	2/213	105/16967	0.380637	0.545579	0.438829	2	NPR1/AGTR2	MF
G protein-coupled receptor activity	9/213	763/16967	0.623426	0.745827	0.599896	9	S1PR1/NPR1/ADRB2/VIPR1/ADRB1/AGTR2/C5AR1/ACKR1/GPRC5A	MF
G protein-coupled receptor binding	8/213	205/16967	0.00443239	0.0606432	0.0487775	8	S1PR1/ADRB1/CCL23/CTHRC1/MARCO/EDN1/CXCL13/CXCL14	MF
G protein-coupled receptor signaling pathway	18/225	1087/17910	0.140822	0.268154	0.193124	18	S1PR1/NPR1/ADRB2/VIPR1/ADRB1/CCL23/MARCO/AGTR2/C5AR1/LRRK2/PPBP/CAV2/ACKR1/CXCL2/EDN1/GPRC5A/CXCL13/NXPH4	BP
G protein-coupled receptor signaling pathway, coupled to cyclic nucleotide second messenger	6/225	178/17910	0.0251337	0.109988	0.0792128	6	S1PR1/VIPR1/ADRB1/MARCO/AGTR2/EDN1	BP
G0 to G1 transition	1/225	47/17910	0.448416	0.546557	0.393629	1	RRM2	BP
G1 DNA damage checkpoint	5/225	64/17910	0.00124953	0.0123919	0.00892461	5	RGCC/CCNB1/AURKA/CDK1/SFN	BP
G1/S transition of mitotic cell cycle	11/225	269/17910	0.000617936	0.00734399	0.00528912	11	FHL1/RGCC/CCNB1/RRM2/AURKA/HYAL1/CDC6/CDT1/CDK1/CDKN3/SFN	BP
G2 DNA damage checkpoint	1/225	30/17910	0.315852	0.434297	0.312779	1	CDK1	BP
G2/M transition of mitotic cell cycle	10/225	238/17910	0.000883568	0.00955331	0.00688026	10	FHL1/CCNB1/TPX2/NEK2/CCNB2/AURKA/CCNA2/AURKB/FOXM1/CDK1	BP
GAIT complex	1/226	4/18675	0.0475391	0.15795	0.116101	1	GAPDH	CC
galactose binding	1/213	5/16967	0.0612196	0.230339	0.18527	1	COLEC12	MF
galactosyltransferase activity	1/213	32/16967	0.33278	0.508461	0.408974	1	B3GNT3	MF
gamete generation	6/225	658/17910	0.838677	0.862211	0.620962	6	TOP2A/CCNB1/AURKA/LRRK2/NCAPH/TP63	BP
gamma-tubulin binding	1/213	22/16967	0.242782	0.416396	0.334923	1	NME1	MF
gap junction	1/226	32/18675	0.322905	0.497056	0.365361	1	GJB2	CC
gap junction assembly	1/225	11/17910	0.129864	0.257699	0.185594	1	GJB2	BP
gap junction channel activity	1/213	15/16967	0.172691	0.353606	0.284418	1	GJB2	MF
gap junction-mediated intercellular transport	1/225	5/17910	0.0612622	0.17431	0.125538	1	GJB2	BP
gas transport	1/225	19/17910	0.213629	0.338705	0.243934	1	AQP1	BP
gastrulation	6/225	178/17910	0.0251337	0.109988	0.0792128	6	FOXF1/TGFBR2/ATOH8/COL11A1/FOXA2/SOX2	BP
gastrulation with mouth forming second	1/225	25/17910	0.27114	0.391293	0.281808	1	FOXA2	BP
gated channel activity	3/213	268/16967	0.65715	0.769658	0.619064	3	SCN7A/AQP1/CLCA2	MF
gene silencing	1/225	803/17910	0.999969	1	0.720197	1	HMGA1	BP
generation of neurons	21/225	1398/17910	0.226423	0.352435	0.253823	21	ANKRD1/VEGFD/SEMA3G/AGER/S1PR1/HHIP/NME1/CTHRC1/AURKA/C5AR1/LRRK2/DOK2/CDK1/SPP1/CRABP2/NDNF/SEMA3B/C1QA/COL3A1/FOXA2/SOX2	BP
generation of precursor metabolites and energy	10/225	502/17910	0.102239	0.233502	0.168167	10	GPD1/CCNB1/HSD17B6/PID1/GAPDH/CDK1/FBP1/GPX2/STEAP4/NQO1	BP
genitalia development	1/225	46/17910	0.44138	0.540807	0.389487	1	TP63	BP
genitalia morphogenesis	1/225	13/17910	0.151603	0.27901	0.200942	1	TP63	BP
germ cell development	2/225	238/17910	0.803222	0.832713	0.599717	2	CCNB1/AURKA	BP
germ cell nucleus	1/226	19/18675	0.206616	0.370826	0.272575	1	AURKA	CC
germinal center formation	1/225	15/17910	0.172801	0.301349	0.21703	1	CXCL13	BP
germinal vesicle	1/226	3/18675	0.0358695	0.136504	0.100337	1	AURKA	CC
gland development	10/225	422/17910	0.0410982	0.144939	0.104385	10	FOXF1/CPB2/NME1/SLC46A2/CCNB2/AURKA/TGFBR2/ALOX15B/SOX2/TP63	BP
gland morphogenesis	3/225	116/17910	0.179206	0.308632	0.222276	3	CPB2/TGFBR2/TP63	BP
glandular epithelial cell differentiation	1/225	45/17910	0.434255	0.53444	0.384902	1	TP63	BP
glial cell activation	5/225	59/17910	0.000863124	0.00935508	0.0067375	5	AGER/C5AR1/LRRK2/IL33/C1QA	BP
glial cell development	4/225	111/17910	0.0514083	0.160941	0.115909	4	AGER/C5AR1/MYRF/C1QA	BP
glial cell differentiation	6/225	212/17910	0.0516062	0.161344	0.116199	6	AGER/C5AR1/CDK1/MYRF/C1QA/SOX2	BP
glial cell fate commitment	1/225	14/17910	0.162269	0.289472	0.208477	1	SOX2	BP
glial cell projection	3/226	24/18675	0.0029339	0.0188828	0.0138798	3	SCN7A/AQP4/GJB2	CC
glial cell proliferation	1/225	50/17910	0.468999	0.56252	0.405125	1	IL33	BP
gliogenesis	7/225	285/17910	0.068841	0.190138	0.136937	7	AGER/C5AR1/CDK1/MYRF/IL33/C1QA/SOX2	BP
glomerular endothelium development	1/225	3/17910	0.037219	0.135873	0.0978554	1	PECAM1	BP
glomerular epithelium development	1/225	21/17910	0.233285	0.357186	0.257244	1	PECAM1	BP
glomerular filtration	1/225	21/17910	0.233285	0.357186	0.257244	1	EMP2	BP
glomerulus development	3/225	61/17910	0.0413518	0.145486	0.104779	3	TEK/PECAM1/AGTR2	BP
glomerulus vasculature development	2/225	24/17910	0.0361724	0.135873	0.0978554	2	TEK/PECAM1	BP
gluconeogenesis	3/225	86/17910	0.0940669	0.224003	0.161326	3	GPD1/GAPDH/FBP1	BP
glucose catabolic process	1/225	36/17910	0.365916	0.475515	0.342464	1	GAPDH	BP
glucose catabolic process to pyruvate	1/225	27/17910	0.289363	0.408543	0.294231	1	GAPDH	BP
glucose homeostasis	6/225	227/17910	0.0672429	0.187713	0.13519	6	AGER/CPB2/NME1/FGFR4/PDK4/FOXA2	BP
glucose import	1/225	68/17910	0.57739	0.64986	0.468027	1	PID1	BP
glucose mediated signaling pathway	1/225	6/17910	0.0730587	0.190736	0.137367	1	AGER	BP
glucose metabolic process	6/225	204/17910	0.0442763	0.153102	0.110264	6	GPD1/PDK4/GAPDH/FBP1/IGFBP3/FOXA2	BP
glucose transmembrane transport	4/225	107/17910	0.0460101	0.156268	0.112544	4	PID1/PPBP/SLC2A1/EDN1	BP
glucose transmembrane transporter activity	2/213	13/16967	0.0111699	0.113971	0.0916712	2	PPBP/SLC2A1	MF
glucuronosyltransferase activity	1/213	32/16967	0.33278	0.508461	0.408974	1	LARGE2	MF
glutamate receptor signaling pathway	1/225	87/17910	0.667978	0.721	0.519262	1	ADRB2	BP
glutamatergic synapse	3/226	352/18675	0.802049	0.915673	0.673065	3	KPNA2/LRRK2/NRGN	CC
glutamine family amino acid biosynthetic process	1/225	13/17910	0.151603	0.27901	0.200942	1	PYCR1	BP
glutamine family amino acid metabolic process	1/225	68/17910	0.57739	0.64986	0.468027	1	PYCR1	BP
glutathione peroxidase activity	1/213	16/16967	0.183086	0.36137	0.290663	1	GPX3	MF
glycerol transmembrane transporter activity	1/213	6/16967	0.0730083	0.246916	0.198603	1	AQP1	MF
glycerol transport	1/225	6/17910	0.0730587	0.190736	0.137367	1	AQP1	BP
glycerol-3-phosphate dehydrogenase complex	1/226	3/18675	0.0358695	0.136504	0.100337	1	GPD1	CC
glycerol-3-phosphate metabolic process	1/225	5/17910	0.0612622	0.17431	0.125538	1	GPD1	BP
glycerolipid biosynthetic process	2/225	246/17910	0.817831	0.845881	0.609201	2	GPD1/LPL	BP
glycerolipid catabolic process	2/225	53/17910	0.14311	0.271253	0.195356	2	FABP4/LPL	BP
glycerolipid metabolic process	3/225	385/17910	0.865391	0.884477	0.636998	3	GPD1/FABP4/LPL	BP
glycerophospholipid biosynthetic process	1/225	213/17910	0.933396	0.943614	0.679587	1	GPD1	BP
glycerophospholipid metabolic process	1/225	300/17910	0.97818	0.982836	0.707835	1	GPD1	BP
glycolipid binding	1/213	21/16967	0.233144	0.409191	0.329127	1	SELP	MF
glycolytic process	3/225	110/17910	0.160735	0.289472	0.208477	3	GPD1/GAPDH/FBP1	BP
glycolytic process through fructose-6-phosphate	1/225	28/17910	0.298305	0.416728	0.300126	1	GAPDH	BP
glycolytic process through glucose-6-phosphate	1/225	28/17910	0.298305	0.416728	0.300126	1	GAPDH	BP
glycoprotein biosynthetic process	4/225	302/17910	0.52768	0.611077	0.440096	4	MGAT3/HBEGF/LARGE2/B3GNT3	BP
glycoprotein catabolic process	1/225	22/17910	0.242928	0.364187	0.262286	1	MMP12	BP
glycoprotein metabolic process	9/225	369/17910	0.044021	0.152338	0.109713	9	SPOCK2/MGAT3/HYAL1/NDNF/HBEGF/LARGE2/MMP12/B3GNT3/COL11A1	BP
glycosaminoglycan binding	12/213	199/16967	8.25721e-06	0.00071012	0.000571176	12	SPOCK2/CCL23/FGFR4/SELP/LPL/TGFBR2/LTBP4/NDNF/HBEGF/THBS2/COL11A1/CXCL13	MF
glycosaminoglycan biosynthetic process	3/225	107/17910	0.151732	0.27901	0.200942	3	OGN/HYAL1/B3GNT3	BP
glycosaminoglycan catabolic process	3/225	61/17910	0.0413518	0.145486	0.104779	3	LYVE1/OGN/HYAL1	BP
glycosaminoglycan metabolic process	6/225	157/17910	0.0144845	0.0758981	0.0546616	6	LYVE1/SPOCK2/OGN/HYAL1/NDNF/B3GNT3	BP
glycoside metabolic process	1/225	17/17910	0.193473	0.321584	0.231604	1	AKR1B10	BP
glycosphingolipid binding	1/213	9/16967	0.107498	0.284908	0.229162	1	SELP	MF
glycosyl compound biosynthetic process	1/225	42/17910	0.412332	0.516639	0.372081	1	NME1	BP
glycosyl compound metabolic process	3/225	132/17910	0.230891	0.357186	0.257244	3	NME1/LRRK2/AKR1B10	BP
glycosylation	4/225	241/17910	0.359016	0.470863	0.339114	4	MGAT3/ALG1L/LARGE2/B3GNT3	BP
Golgi apparatus	25/226	1441/18675	0.0435929	0.15795	0.116101	25	STX11/EMP2/GIMAP8/FGD5/CD36/AOC3/FGFR4/KIF20A/OGN/MGAT3/LRRK2/CAV2/MYRF/SPP1/SLC2A1/MMP11/LARGE2/COL1A1/B3GNT3/PERP/STEAP4/CXCL14/SERPINA1/TP63/SPRR3	CC
Golgi apparatus part	11/226	891/18675	0.51681	0.685086	0.503572	11	EMP2/OGN/MGAT3/LRRK2/CAV2/SLC2A1/MMP11/LARGE2/B3GNT3/STEAP4/SERPINA1	CC
Golgi disassembly	1/225	6/17910	0.0730587	0.190736	0.137367	1	CDK1	BP
Golgi inheritance	1/225	13/17910	0.151603	0.27901	0.200942	1	CDK1	BP
Golgi lumen	2/226	102/18675	0.350491	0.533525	0.392167	2	OGN/MMP11	CC
Golgi membrane	8/226	691/18675	0.600871	0.750632	0.551752	8	EMP2/MGAT3/CAV2/SLC2A1/LARGE2/B3GNT3/STEAP4/SERPINA1	CC
Golgi organization	2/225	94/17910	0.331033	0.448219	0.322806	2	LRRK2/CDK1	BP
Golgi subcompartment	9/226	780/18675	0.605584	0.7522	0.552904	9	EMP2/MGAT3/LRRK2/CAV2/SLC2A1/LARGE2/B3GNT3/STEAP4/SERPINA1	CC
Golgi vesicle budding	1/225	75/17910	0.613319	0.677847	0.488183	1	SERPINA1	BP
Golgi vesicle transport	3/225	304/17910	0.738495	0.778908	0.560967	3	KIF4A/LRRK2/SERPINA1	BP
Golgi-associated vesicle	3/226	145/18675	0.256622	0.420657	0.309203	3	LRRK2/NRGN/SERPINA1	CC
Golgi-associated vesicle membrane	1/226	102/18675	0.712145	0.838658	0.616455	1	NRGN	CC
gonad development	1/225	217/17910	0.93672	0.946111	0.681386	1	RETN	BP
granulocyte activation	17/225	506/17910	0.000234284	0.00364233	0.00262319	17	MCEMP1/PECAM1/RETN/CD36/CD93/OSCAR/FGR/OLR1/C5AR1/PPBP/ALOX5/ANXA3/DSP/LYZ/SLPI/SERPINA1/PKP1	BP
granulocyte chemotaxis	2/225	84/17910	0.284727	0.40572	0.292198	2	C5AR1/EDN1	BP
granulocyte differentiation	1/225	32/17910	0.332963	0.448639	0.323109	1	CSF3	BP
granulocyte migration	3/225	100/17910	0.1314	0.259696	0.187032	3	PECAM1/C5AR1/EDN1	BP
growth	31/225	948/17910	1.00714e-06	6.28824e-05	4.52877e-05	31	SEMA3G/ACVRL1/FHL1/S1PR1/NPR1/ADRB2/ADRB1/CD36/CCNB1/CACNA2D2/CCNB2/AURKA/AGTR2/HYAL1/TGFBR2/MT1M/KLF2/CDK1/SPP1/LTBP4/CRABP2/HBEGF/EDN1/FBP1/IGFBP3/ALOX15B/SFN/PRAME/KRT17/MMP13/SOX2	BP
growth cone	1/226	166/18675	0.868688	0.957187	0.70358	1	LRRK2	CC
growth factor activity	4/213	147/16967	0.11406	0.292245	0.235064	4	GDF10/OGN/PPBP/HBEGF	MF
growth factor binding	13/213	121/16967	3.9732e-09	2.39187e-06	1.92387e-06	13	TEK/ACVRL1/CD36/FGFR4/LRRC32/TGFBR2/A2M/LTBP4/DUSP1/COL1A1/COL3A1/IGFBP3/CXCL13	MF
growth factor complex	1/226	5/18675	0.059068	0.177204	0.130254	1	IGFBP3	CC
growth factor receptor binding	2/213	121/16967	0.450213	0.600949	0.483365	2	VEGFD/CDH5	MF
growth hormone secretion	1/225	16/17910	0.183202	0.310212	0.223414	1	LTBP4	BP
growth involved in heart morphogenesis	1/225	5/17910	0.0612622	0.17431	0.125538	1	S1PR1	BP
growth involved in symbiotic interaction	1/225	17/17910	0.193473	0.321584	0.231604	1	CD36	BP
growth of symbiont in host	1/225	16/17910	0.183202	0.310212	0.223414	1	CD36	BP
growth of symbiont involved in interaction with host	1/225	17/17910	0.193473	0.321584	0.231604	1	CD36	BP
growth plate cartilage chondrocyte development	1/225	4/17910	0.0493163	0.156268	0.112544	1	TGFBR2	BP
growth plate cartilage chondrocyte differentiation	1/225	5/17910	0.0612622	0.17431	0.125538	1	TGFBR2	BP
growth plate cartilage development	2/225	15/17910	0.0148141	0.0763613	0.0549952	2	TGFBR2/MMP13	BP
GTP binding	3/213	313/16967	0.755919	0.853778	0.686725	3	NPR1/NME1/LRRK2	MF
GTP biosynthetic process	1/225	9/17910	0.10757	0.234674	0.169011	1	NME1	BP
GTP metabolic process	2/225	29/17910	0.0510905	0.160286	0.115438	2	NME1/LRRK2	BP
GTPase activator activity	1/213	203/16967	0.924229	0.955989	0.768937	1	LRRK2	MF
GTPase activity	2/213	224/16967	0.774919	0.861857	0.693223	2	LRRK2/RRAD	MF
GTPase binding	4/213	426/16967	0.785863	0.863027	0.694164	4	SH2D3C/FGD5/ADRB1/LRRK2	MF
GTPase regulator activity	1/213	235/16967	0.949693	0.97079	0.780842	1	LRRK2	MF
guanosine-containing compound biosynthetic process	1/225	13/17910	0.151603	0.27901	0.200942	1	NME1	BP
guanosine-containing compound metabolic process	2/225	45/17910	0.109548	0.237469	0.171025	2	NME1/LRRK2	BP
guanyl nucleotide binding	3/213	331/16967	0.78848	0.863027	0.694164	3	NPR1/NME1/LRRK2	MF
guanyl ribonucleotide binding	3/213	331/16967	0.78848	0.863027	0.694164	3	NPR1/NME1/LRRK2	MF
guanyl-nucleotide exchange factor activity	3/213	196/16967	0.447454	0.599595	0.482276	3	SH2D3C/FGD5/ADRB1	MF
guanylate cyclase activity	1/213	5/16967	0.0612196	0.230339	0.18527	1	NPR1	MF
hair cycle	5/225	109/17910	0.0121754	0.0659019	0.0474623	5	LDB2/FERMT1/CDH3/KRT17/TP63	BP
hair cycle phase	2/225	9/17910	0.00533704	0.0356849	0.0257001	2	FERMT1/CDH3	BP
hair cycle process	5/225	87/17910	0.00480082	0.0329601	0.0237378	5	LDB2/FERMT1/CDH3/KRT17/TP63	BP
hair follicle development	5/225	85/17910	0.00434847	0.0309418	0.0222842	5	LDB2/FERMT1/CDH3/KRT17/TP63	BP
hair follicle maturation	2/225	16/17910	0.0167917	0.0830775	0.0598321	2	FERMT1/CDH3	BP
hair follicle morphogenesis	2/225	24/17910	0.0361724	0.135873	0.0978554	2	KRT17/TP63	BP
head development	14/225	738/17910	0.0826053	0.207349	0.149332	14	S1PR1/NME1/CLDN5/AGTR2/TGFBR2/C5AR1/LRRK2/SLC2A1/ANXA3/AQP1/NRGN/COL1A1/COL3A1/SOX2	BP
head morphogenesis	2/225	35/17910	0.0713301	0.190736	0.137367	2	CLDN5/COL1A1	BP
heart contraction	7/225	275/17910	0.059198	0.17431	0.125538	7	NPR1/ADRB1/CACNA2D2/AGTR2/HBEGF/DSP/EDN1	BP
heart development	16/225	556/17910	0.00183159	0.0163041	0.0117421	16	TEK/ANKRD1/TMEM100/ACVRL1/S1PR1/FOXF1/CCNB1/CLDN5/AGTR2/TGFBR2/CDK1/DSP/EDN1/MYH11/COL3A1/COL11A1	BP
heart growth	6/225	112/17910	0.00291194	0.023217	0.0167208	6	S1PR1/CCNB1/AGTR2/TGFBR2/CDK1/EDN1	BP
heart looping	1/225	59/17910	0.526271	0.610243	0.439495	1	TGFBR2	BP
heart morphogenesis	10/225	249/17910	0.00124312	0.0123559	0.00889868	10	TEK/ANKRD1/TMEM100/ACVRL1/S1PR1/FOXF1/CLDN5/TGFBR2/DSP/COL11A1	BP
heart process	7/225	284/17910	0.0678367	0.187833	0.135276	7	NPR1/ADRB1/CACNA2D2/AGTR2/HBEGF/DSP/EDN1	BP
heart trabecula formation	1/225	13/17910	0.151603	0.27901	0.200942	1	TEK	BP
heart trabecula morphogenesis	2/225	32/17910	0.0609185	0.17431	0.125538	2	TEK/S1PR1	BP
heart valve development	1/225	61/17910	0.538138	0.618984	0.44579	1	TGFBR2	BP
heart valve morphogenesis	1/225	52/17910	0.482294	0.572886	0.412591	1	TGFBR2	BP
heat generation	2/225	16/17910	0.0167917	0.0830775	0.0598321	2	ADRB2/ADRB1	BP
heat shock protein binding	2/213	108/16967	0.393986	0.55807	0.448876	2	SPN/CDK1	MF
hedgehog family protein binding	1/213	3/16967	0.0371927	0.194696	0.156601	1	HHIP	MF
helicase activity	1/213	128/16967	0.802729	0.870708	0.700342	1	RECQL4	MF
hematopoietic or lymphoid organ development	15/225	890/17910	0.152526	0.279978	0.201639	15	TEK/AGER/CLDN18/TOP2A/NME1/SPN/OSCAR/SLC46A2/CCNB2/TGFBR2/KLF2/HMGB3/CSF3/IL7R/FOS	BP
hematopoietic progenitor cell differentiation	1/225	158/17910	0.865523	0.884477	0.636998	1	TOP2A	BP
heme binding	3/213	106/16967	0.148516	0.330456	0.265798	3	CYP4B1/DUOX1/STEAP4	MF
hemidesmosome	1/226	7/18675	0.0817106	0.207303	0.152378	1	COL17A1	CC
hemidesmosome assembly	1/225	11/17910	0.129864	0.257699	0.185594	1	COL17A1	BP
hemopoiesis	14/225	847/17910	0.180282	0.310212	0.223414	14	TEK/AGER/CLDN18/TOP2A/NME1/SPN/OSCAR/SLC46A2/TGFBR2/KLF2/HMGB3/CSF3/IL7R/FOS	BP
hemostasis	10/225	336/17910	0.0102322	0.0581527	0.0418814	10	CPB2/CD36/SELP/VWF/A2M/EDN1/COL1A1/COL3A1/FOXA2/SERPINA1	BP
heparan sulfate binding	1/213	3/16967	0.0371927	0.194696	0.156601	1	COL11A1	MF
heparan sulfate proteoglycan binding	1/213	16/16967	0.183086	0.36137	0.290663	1	LPL	MF
heparin binding	9/213	148/16967	0.000106239	0.00581419	0.00467656	9	CCL23/FGFR4/SELP/LPL/NDNF/HBEGF/THBS2/COL11A1/CXCL13	MF
hepaticobiliary system development	2/225	133/17910	0.499758	0.588115	0.423558	2	CPB2/AURKA	BP
hepatocyte proliferation	1/225	18/17910	0.203614	0.330995	0.238381	1	CPB2	BP
hepoxilin biosynthetic process	1/225	5/17910	0.0612622	0.17431	0.125538	1	ALOX15B	BP
hepoxilin metabolic process	1/225	5/17910	0.0612622	0.17431	0.125538	1	ALOX15B	BP
heterochromatin	2/226	75/18675	0.230021	0.393912	0.289544	2	HMGA1/CENPA	CC
heterochromatin assembly	1/225	11/17910	0.129864	0.257699	0.185594	1	HMGA1	BP
heterochromatin organization	1/225	18/17910	0.203614	0.330995	0.238381	1	HMGA1	BP
heterocycle biosynthetic process	57/225	4089/17910	0.204766	0.33243	0.239415	57	GPD1/ANKRD1/TMEM100/AGER/ACVRL1/RGCC/S1PR1/NPR1/FABP4/ADRB2/FOXF1/PYCR1/CD36/TOP2A/NME1/FGFR4/CCNB1/MYBL2/RRM2/NEK2/CHRDL1/HMGA1/DLGAP5/CCNA2/AGTR2/AURKB/CDC6/PID1/PDK4/C5AR1/CDT1/FOXM1/KLF2/GAPDH/CDK1/MYRF/SPP1/PSAT1/CDCA7/ANXA3/CSF3/FOSB/ETV4/ATOH8/CRABP2/IL33/DUSP1/MMP12/EDN1/FBP1/NR4A1/COL1A1/FOS/FOXA2/PRAME/SOX2/TP63	BP
heterocycle catabolic process	4/225	641/17910	0.962446	0.968459	0.697481	4	GPD1/GAPDH/FBP1/PKP1	BP
heterophilic cell-cell adhesion via plasma membrane cell adhesion molecules	1/225	35/17910	0.357833	0.470007	0.338498	1	SELP	BP
heterotypic cell-cell adhesion	3/225	61/17910	0.0413518	0.145486	0.104779	3	AGER/DSP/PERP	BP
hexosaminidase activity	1/213	15/16967	0.172691	0.353606	0.284418	1	HYAL1	MF
hexose biosynthetic process	3/225	89/17910	0.101653	0.232402	0.167375	3	GPD1/GAPDH/FBP1	BP
hexose catabolic process	1/225	55/17910	0.501618	0.588585	0.423897	1	GAPDH	BP
hexose mediated signaling	1/225	6/17910	0.0730587	0.190736	0.137367	1	AGER	BP
hexose metabolic process	6/225	239/17910	0.081538	0.206666	0.14884	6	GPD1/PDK4/GAPDH/FBP1/IGFBP3/FOXA2	BP
hexose transmembrane transport	4/225	112/17910	0.0528098	0.1644	0.1184	4	PID1/PPBP/SLC2A1/EDN1	BP
hexose transmembrane transporter activity	2/213	13/16967	0.0111699	0.113971	0.0916712	2	PPBP/SLC2A1	MF
high-density lipoprotein particle binding	1/213	17/16967	0.193351	0.364883	0.293488	1	CD36	MF
hijacked molecular function	3/213	74/16967	0.0661537	0.244322	0.196517	3	MRC1/CDK1/NECTIN4	MF
hindbrain development	2/225	150/17910	0.564465	0.64128	0.461847	2	AGTR2/C5AR1	BP
hindlimb morphogenesis	1/225	35/17910	0.357833	0.470007	0.338498	1	TP63	BP
hippocampus development	2/225	79/17910	0.261429	0.383102	0.275909	2	NME1/ANXA3	BP
histamine secretion	1/225	11/17910	0.129864	0.257699	0.185594	1	EDN1	BP
histamine transport	1/225	12/17910	0.140802	0.268154	0.193124	1	EDN1	BP
histone deacetylase binding	3/213	102/16967	0.13687	0.315693	0.253923	3	ANKRD1/TOP2A/KPNA2	MF
histone deacetylation	1/225	61/17910	0.538138	0.618984	0.44579	1	LRRK2	BP
histone exchange	1/225	55/17910	0.501618	0.588585	0.423897	1	CENPA	BP
histone H3-S10 phosphorylation	1/225	5/17910	0.0612622	0.17431	0.125538	1	CCNB1	BP
histone H3-S28 phosphorylation	1/225	3/17910	0.037219	0.135873	0.0978554	1	AURKB	BP
histone kinase activity	2/213	14/16967	0.0129247	0.125411	0.100873	2	AURKB/CDK1	MF
histone modification	6/225	420/17910	0.433263	0.53444	0.384902	6	CCNB1/AURKA/CCNA2/AURKB/LRRK2/CDK1	BP
histone phosphorylation	5/225	38/17910	0.000107152	0.00195504	0.00140801	5	CCNB1/AURKA/CCNA2/AURKB/CDK1	BP
histone serine kinase activity	1/213	4/16967	0.0492817	0.209887	0.16882	1	AURKB	MF
histone-serine phosphorylation	3/225	11/17910	0.000299651	0.00448768	0.00323201	3	CCNB1/AURKA/AURKB	BP
homeostasis of number of cells	4/225	241/17910	0.359016	0.470863	0.339114	4	SLC46A2/CCNB2/KLF2/IL7R	BP
homeostatic process	42/225	1730/17910	2.30327e-05	0.00063815	0.000459594	42	LDB2/AGER/FHL1/S1PR1/NPR1/FABP4/ADRB2/CLDN18/ADRB1/CPB2/CCL23/SCN7A/CD36/NME1/UBE2C/FGFR4/SLC46A2/SCARA5/NEK2/CCNB2/AQP4/LPL/RECQL4/AGTR2/AURKB/PDK4/LRRK2/CD52/KLF2/AQP1/LARGE2/C7/SFTPD/IL7R/EDN1/CDH3/FOXA2/SFN/CXCL13/LYZ/STEAP4/TP63	BP
homophilic cell adhesion via plasma membrane adhesion molecules	4/225	130/17910	0.0815124	0.206666	0.14884	4	PECAM1/ESAM/DSG3/DSC3	BP
homotypic cell-cell adhesion	1/225	77/17910	0.623015	0.684976	0.493317	1	DSP	BP
hormone activity	2/213	103/16967	0.371669	0.538203	0.432896	2	RETN/EDN1	MF
hormone binding	2/213	81/16967	0.27048	0.444498	0.357526	2	NPR1/VIPR1	MF
hormone biosynthetic process	2/225	84/17910	0.284727	0.40572	0.292198	2	HSD17B6/DUOX1	BP
hormone catabolic process	2/225	14/17910	0.012945	0.0689726	0.0496739	2	HSD17B6/SPP1	BP
hormone metabolic process	5/225	215/17910	0.134831	0.26459	0.190557	5	HSD17B6/SPP1/DUOX1/CRABP2/AKR1B10	BP
hormone receptor binding	3/213	170/16967	0.35997	0.535066	0.430373	3	FABP4/HMGA1/PRAME	MF
hormone secretion	8/225	301/17910	0.0368172	0.135873	0.0978554	8	RETN/CACNA2D2/AGTR2/SPP1/SLC2A1/LTBP4/EDN1/FOXA2	BP
hormone transport	8/225	311/17910	0.0432293	0.149715	0.107824	8	RETN/CACNA2D2/AGTR2/SPP1/SLC2A1/LTBP4/EDN1/FOXA2	BP
hormone-mediated signaling pathway	2/225	215/17910	0.755322	0.792507	0.570761	2	NR4A1/TP63	BP
host	3/226	69/18675	0.0511869	0.166967	0.122729	3	TOP2A/KPNA2/AQP1	CC
host cell	3/226	69/18675	0.0511869	0.166967	0.122729	3	TOP2A/KPNA2/AQP1	CC
host cell cytoplasm	1/226	6/18675	0.0704579	0.193631	0.142328	1	AQP1	CC
host cell cytoplasm part	1/226	6/18675	0.0704579	0.193631	0.142328	1	AQP1	CC
host cell part	1/226	12/18675	0.135972	0.288064	0.211741	1	AQP1	CC
host intracellular part	1/226	9/18675	0.103811	0.243807	0.17921	1	AQP1	CC
Hsp70 protein binding	2/213	41/16967	0.0935572	0.274014	0.220399	2	SPN/CDK1	MF
humoral immune response	14/225	276/17910	1.09272e-05	0.000369774	0.00026631	14	RGCC/CPB2/C5AR1/VSIG4/A2M/GAPDH/C7/SFTPD/C1QA/C1QB/CXCL13/LYZ/SLPI/PI3	BP
humoral immune response mediated by circulating immunoglobulin	3/225	104/17910	0.142897	0.271253	0.195356	3	C7/C1QA/C1QB	BP
hyaluranon cable assembly	1/225	3/17910	0.037219	0.135873	0.0978554	1	HYAL1	BP
hyaluronan biosynthetic process	1/225	14/17910	0.162269	0.289472	0.208477	1	HYAL1	BP
hyaluronan catabolic process	2/225	16/17910	0.0167917	0.0830775	0.0598321	2	LYVE1/HYAL1	BP
hyaluronan metabolic process	2/225	37/17910	0.0785672	0.200743	0.144574	2	LYVE1/HYAL1	BP
hyaluronan synthase activity	1/213	4/16967	0.0492817	0.209887	0.16882	1	HYAL1	MF
hyalurononglucosaminidase activity	1/213	8/16967	0.0961456	0.274014	0.220399	1	HYAL1	MF
hydrogen peroxide biosynthetic process	1/225	17/17910	0.193473	0.321584	0.231604	1	DUOX1	BP
hydrogen peroxide catabolic process	2/225	22/17910	0.0307729	0.127254	0.091648	2	GPX3/DUOX1	BP
hydrogen peroxide metabolic process	2/225	47/17910	0.117729	0.24699	0.177881	2	GPX3/DUOX1	BP
hydrolase activity	21/213	2052/16967	0.868726	0.919945	0.739945	21	PTPN21/TOP2A/NME1/DLGAP5/LPL/RECQL4/HYAL1/LRRK2/MYRF/CDKN3/DUSP1/MMP12/FBP1/MMP1/ALPL/MYH11/RRAD/LYZ/MMP13/MMP10/CLCA2	MF
hydrolase activity, acting on acid anhydrides	6/213	676/16967	0.85634	0.914036	0.735193	6	TOP2A/RECQL4/LRRK2/ALPL/MYH11/RRAD	MF
hydrolase activity, acting on acid anhydrides, in phosphorus-containing anhydrides	6/213	676/16967	0.85634	0.914036	0.735193	6	TOP2A/RECQL4/LRRK2/ALPL/MYH11/RRAD	MF
hydrolase activity, acting on ester bonds	8/213	621/16967	0.521026	0.654818	0.526694	8	PTPN21/NME1/DLGAP5/LPL/CDKN3/DUSP1/FBP1/ALPL	MF
hydrolase activity, acting on glycosyl bonds	2/213	104/16967	0.376159	0.540448	0.434702	2	HYAL1/LYZ	MF
hydrolase activity, hydrolyzing O-glycosyl compounds	2/213	82/16967	0.275137	0.450088	0.362023	2	HYAL1/LYZ	MF
hyperosmotic response	2/225	28/17910	0.0479545	0.156268	0.112544	2	SLC2A1/AQP1	BP
I band	3/226	116/18675	0.166075	0.320455	0.23555	3	MYZAP/ANKRD1/SLC2A1	CC
I-kappaB kinase/NF-kappaB signaling	1/225	253/17910	0.9601	0.967081	0.696489	1	CD36	BP
icosanoid binding	1/213	6/16967	0.0730083	0.246916	0.198603	1	ALOX5AP	MF
icosanoid biosynthetic process	3/225	53/17910	0.0289326	0.122151	0.0879724	3	ALOX5AP/ALOX5/EDN1	BP
icosanoid metabolic process	4/225	102/17910	0.0397316	0.141356	0.101804	4	ALOX5AP/ALOX5/EDN1/ALOX15B	BP
icosanoid secretion	2/225	42/17910	0.0975812	0.225184	0.162176	2	AGTR2/EDN1	BP
icosanoid transport	2/225	43/17910	0.101527	0.232234	0.167254	2	AGTR2/EDN1	BP
icosatetraenoic acid binding	1/213	6/16967	0.0730083	0.246916	0.198603	1	ALOX5AP	MF
identical protein binding	33/213	1670/16967	0.00583771	0.0732146	0.0588891	33	GPD1/VEGFD/AGER/ADRB2/CLDN18/PECAM1/PYCR1/TOP2A/AOC3/NME1/CLDN5/VWF/SFTPC/RRM2/OLR1/LPL/LRRK2/GAPDH/CAV2/SLC2A1/NECTIN4/AQP1/HSPB8/SFTPD/GJB2/FBP1/COL1A1/C1QB/SFN/LYZ/NQO1/SERPINA1/TP63	MF
immune effector process	32/225	1197/17910	4.16056e-05	0.000970724	0.000699112	32	MCEMP1/AGER/RGCC/EMP2/FOXF1/PECAM1/CPB2/RETN/CD36/SPN/CD93/OSCAR/FGR/OLR1/C5AR1/VSIG4/PPBP/A2M/ALOX5/ANXA3/IL33/C7/DSP/IL7R/SFTPA1/MMP12/C1QA/C1QB/LYZ/SLPI/SERPINA1/PKP1	BP
immune response	53/225	2148/17910	8.7819e-07	5.63102e-05	4.05544e-05	53	MCEMP1/AGER/RGCC/EMP2/FOXF1/PECAM1/CPB2/RETN/CCL23/CD36/SPN/CD93/IL1RL1/OSCAR/AQP4/FGR/LAMP3/OLR1/MARCO/MRC1/C5AR1/VSIG4/PPBP/SUSD2/A2M/GAPDH/PRG4/COLEC12/HMGB3/ALOX5/ANXA3/CSF3/IL33/C7/SFTPD/DSP/IL7R/SFTPA1/MMP12/EDN1/COL1A1/C1QA/C1QB/COL3A1/FOS/COL17A1/CXCL13/LYZ/SLPI/CXCL14/SERPINA1/PKP1/PI3	BP
immune response-activating cell surface receptor signaling pathway	2/225	399/17910	0.962301	0.968459	0.697481	2	FGR/C5AR1	BP
immune response-activating signal transduction	7/225	567/17910	0.572142	0.64537	0.464794	7	CD36/FGR/MARCO/C5AR1/COLEC12/SFTPD/SFTPA1	BP
immune response-regulating cell surface receptor signaling pathway	3/225	434/17910	0.912666	0.925188	0.666317	3	FGR/C5AR1/FOS	BP
immune response-regulating cell surface receptor signaling pathway involved in phagocytosis	1/225	139/17910	0.828666	0.854098	0.615119	1	FGR	BP
immune response-regulating signaling pathway	8/225	603/17910	0.488315	0.57831	0.416497	8	CD36/FGR/MARCO/C5AR1/COLEC12/SFTPD/SFTPA1/FOS	BP
immune system development	15/225	938/17910	0.202259	0.330995	0.238381	15	TEK/AGER/CLDN18/TOP2A/NME1/SPN/OSCAR/SLC46A2/CCNB2/TGFBR2/KLF2/HMGB3/CSF3/IL7R/FOS	BP
immune system process	72/225	3063/17910	2.9621e-08	4.377e-06	3.1523e-06	72	TEK/VEGFD/MCEMP1/AGER/RGCC/S1PR1/EMP2/FOXF1/CLDN18/PECAM1/CPB2/RETN/CCL23/CD36/TOP2A/NME1/SPN/LRRC32/CD93/ESAM/IL1RL1/SELP/OSCAR/SLC46A2/CCNB2/AQP4/FGR/LAMP3/OLR1/MARCO/KIF4A/MRC1/TGFBR2/C5AR1/LRRK2/DOK2/VSIG4/PPBP/KLF2/SUSD2/A2M/GAPDH/PRG4/COLEC12/HMGB3/ALOX5/ANXA3/CSF3/IL33/SLC7A5/C7/DUSP1/SFTPD/DSP/IL7R/SFTPA1/MMP12/EDN1/MMP1/COL1A1/C1QA/C1QB/COL3A1/FOS/COL17A1/CXCL13/LYZ/SLPI/CXCL14/SERPINA1/…	BP
immunoglobulin binding	1/213	23/16967	0.252301	0.420734	0.338412	1	VWF	MF
immunoglobulin mediated immune response	3/225	171/17910	0.363802	0.475515	0.342464	3	C7/C1QA/C1QB	BP
immunoglobulin production	2/225	98/17910	0.349343	0.462959	0.333421	2	IL33/IL7R	BP
immunoglobulin receptor binding	1/213	9/16967	0.107498	0.284908	0.229162	1	FGR	MF
immunoglobulin secretion	1/225	22/17910	0.242928	0.364187	0.262286	1	IL33	BP
import into cell	18/225	751/17910	0.00673459	0.0424672	0.0305847	18	ADRB2/PECAM1/CD36/NME1/CD93/SCARA5/FGR/MARCO/MSR1/MRC1/TGFBR2/LRRK2/CAV2/COLEC12/ANXA3/SFTPD/SFTPA1/PROM2	BP
import into nucleus	6/225	125/17910	0.00499367	0.0340568	0.0245276	6	CD36/AGTR2/KPNA2/LRRK2/FERMT1/MMP12	BP
importin-alpha family protein binding	1/213	7/16967	0.0846497	0.264037	0.212375	1	TPX2	MF
in utero embryonic development	10/225	342/17910	0.0114807	0.0625233	0.045029	10	TMEM100/ACVRL1/FOXF1/CCNB1/NEK2/CCNB2/TGFBR2/KLF2/EDN1/DSC3	BP
inactivation of MAPK activity	1/225	24/17910	0.261854	0.383102	0.275909	1	DUSP1	BP
inclusion body	2/226	81/18675	0.256897	0.420657	0.309203	2	FGR/LRRK2	CC
indanol dehydrogenase activity	1/213	3/16967	0.0371927	0.194696	0.156601	1	AKR1B10	MF
induction of bacterial agglutination	1/225	6/17910	0.0730587	0.190736	0.137367	1	SFTPD	BP
induction of positive chemotaxis	2/225	11/17910	0.00802	0.0485692	0.0349794	2	VEGFD/AGER	BP
inflammatory response	28/225	784/17910	6.37496e-07	4.48574e-05	3.23062e-05	28	TEK/AGER/FABP4/CDH5/FOXF1/CPB2/CD36/AOC3/IL1RL1/SELP/OLR1/LPL/HYAL1/C5AR1/LRRK2/VSIG4/A2M/SPP1/ALOX5/PBK/IL33/C7/C1QA/C1QB/FOS/CXCL13/LYZ/SERPINA1	BP
inflammatory response to wounding	1/225	13/17910	0.151603	0.27901	0.200942	1	AGER	BP
innate immune response	19/225	893/17910	0.0176622	0.0860479	0.0619714	19	AGER/CD36/AQP4/FGR/MARCO/MRC1/VSIG4/A2M/GAPDH/COLEC12/HMGB3/C7/SFTPD/SFTPA1/MMP12/EDN1/C1QA/C1QB/SLPI	BP
innate immune response-activating signal transduction	5/225	298/17910	0.320472	0.43983	0.316764	5	CD36/MARCO/COLEC12/SFTPD/SFTPA1	BP
inner ear development	7/225	185/17910	0.00898749	0.0529477	0.0381327	7	CTHRC1/CCNA2/GJB2/C1QB/COL11A1/CXCL14/SOX2	BP
inner ear morphogenesis	2/225	95/17910	0.335625	0.451266	0.325	2	CTHRC1/COL11A1	BP
inner ear receptor cell development	1/225	39/17910	0.389563	0.497675	0.358424	1	CTHRC1	BP
inner ear receptor cell differentiation	1/225	53/17910	0.488817	0.57831	0.416497	1	CTHRC1	BP
inner ear receptor cell stereocilium organization	1/225	27/17910	0.289363	0.408543	0.294231	1	CTHRC1	BP
inorganic anion transmembrane transport	1/225	90/17910	0.680395	0.731198	0.526606	1	CLCA2	BP
inorganic anion transmembrane transporter activity	1/213	118/16967	0.775958	0.861857	0.693223	1	CLCA2	MF
inorganic anion transport	1/225	150/17910	0.851079	0.872332	0.62825	1	CLCA2	BP
inorganic cation transmembrane transport	6/225	643/17910	0.822494	0.849514	0.611817	6	FHL1/SLC39A8/SCARA5/CACNA2D2/AQP1/RRAD	BP
inorganic cation transmembrane transporter activity	1/213	444/16967	0.996601	0.999938	0.804286	1	AQP1	MF
inorganic ion homeostasis	15/225	600/17910	0.00902223	0.0529477	0.0381327	15	S1PR1/NPR1/CCL23/SCN7A/CD36/FGFR4/SCARA5/AGTR2/PDK4/LRRK2/CD52/C7/EDN1/CXCL13/STEAP4	BP
inorganic ion transmembrane transport	7/225	722/17910	0.806867	0.835906	0.602017	7	FHL1/SLC39A8/SCARA5/CACNA2D2/AQP1/RRAD/CLCA2	BP
inorganic molecular entity transmembrane transporter activity	4/213	619/16967	0.95439	0.972153	0.781938	4	AQP4/AQP1/SLC7A5/CLCA2	MF
inositol lipid-mediated signaling	6/225	163/17910	0.0171251	0.0841636	0.0606143	6	TEK/SELP/CEP55/FGR/CSF3/EDN1	BP
inositol phosphate-mediated signaling	1/225	52/17910	0.482294	0.572886	0.412591	1	EDN1	BP
insulin receptor signaling pathway	3/225	128/17910	0.217694	0.34392	0.24769	3	PID1/PDK4/CAV2	BP
insulin secretion	3/225	200/17910	0.460957	0.556805	0.401009	3	CACNA2D2/SLC2A1/FOXA2	BP
insulin secretion involved in cellular response to glucose stimulus	1/225	61/17910	0.538138	0.618984	0.44579	1	FOXA2	BP
insulin-like growth factor binding	1/213	26/16967	0.280147	0.455807	0.366622	1	IGFBP3	MF
insulin-like growth factor binding protein complex	1/226	5/18675	0.059068	0.177204	0.130254	1	IGFBP3	CC
insulin-like growth factor I binding	1/213	10/16967	0.118708	0.292245	0.235064	1	IGFBP3	MF
insulin-like growth factor receptor signaling pathway	2/225	36/17910	0.0749204	0.193996	0.139716	2	CDH3/IGFBP3	BP
insulin-like growth factor ternary complex	1/226	4/18675	0.0475391	0.15795	0.116101	1	IGFBP3	CC
integral component of membrane	66/226	4821/18675	0.137284	0.289352	0.212688	66	TEK/MCEMP1/TMEM100/AGER/ACVRL1/LYVE1/ECSCR/S1PR1/NPR1/ADRB2/GPA33/CDH5/EMP2/CLDN18/VIPR1/PECAM1/HHIP/CLEC14A/CD36/AOC3/SPN/FGFR4/CLDN5/LRRC32/CD93/ESAM/IL1RL1/SELP/OSCAR/SLC46A2/SCARA5/AQP4/LAMP3/OLR1/MARCO/MGAT3/MSR1/MRC1/AGTR2/TGFBR2/C5AR1/VSIG4/SUSD2/CAV2/MYRF/SLC2A1/COLEC12/ALOX5AP/NECTIN4/ACKR1/AQP1/SLC7A5/HBEGF/LARGE2/C7/IL7R/PROM2/GJB2/CDH3/B3GNT3/GPRC5A/PERP/COL17A1/STEAP4/DSG3/DSC3	CC
integral component of plasma membrane	32/226	1158/18675	1.04545e-05	0.000211925	0.000155775	32	TEK/AGER/ACVRL1/LYVE1/ADRB2/GPA33/VIPR1/HHIP/CD36/SPN/FGFR4/LRRC32/SELP/SCARA5/AQP4/OLR1/MARCO/MSR1/MRC1/AGTR2/C5AR1/CAV2/SLC2A1/AQP1/HBEGF/C7/PROM2/GJB2/B3GNT3/GPRC5A/PERP/COL17A1	CC
integrin activation	2/225	22/17910	0.0307729	0.127254	0.091648	2	SELP/CXCL13	BP
integrin binding	5/213	113/16967	0.0139981	0.125411	0.100873	5	EMP2/VWF/SPP1/LTBP4/COL3A1	MF
integrin-mediated signaling pathway	4/225	94/17910	0.0307713	0.127254	0.091648	4	EMP2/FGR/FERMT1/COL3A1	BP
interaction with host	7/225	211/17910	0.0174735	0.0855615	0.0616211	7	MRC1/KPNA2/HYAL1/GAPDH/CAV2/CDK1/NECTIN4	BP
interaction with symbiont	4/225	81/17910	0.0190154	0.0904456	0.0651386	4	GAPDH/CAV2/AQP1/SFTPD	BP
intercalated disc	2/226	50/18675	0.122595	0.270896	0.199122	2	SLC2A1/DSP	CC
intercellular bridge	4/226	59/18675	0.00565043	0.0293965	0.0216079	4	TPX2/KIF20A/CEP55/KIF4A	CC
intercellular transport	1/225	6/17910	0.0730587	0.190736	0.137367	1	GJB2	BP
interferon-alpha production	1/225	28/17910	0.298305	0.416728	0.300126	1	MMP12	BP
interferon-alpha secretion	1/225	7/17910	0.0847076	0.207349	0.149332	1	MMP12	BP
interferon-gamma production	3/225	105/17910	0.145823	0.275899	0.198702	3	SPN/IL1RL1/IL33	BP
interleukin-1 beta biosynthetic process	1/225	13/17910	0.151603	0.27901	0.200942	1	AGER	BP
interleukin-1 beta production	3/225	93/17910	0.112132	0.242479	0.174632	3	AGER/CD36/LPL	BP
interleukin-1 beta secretion	2/225	51/17910	0.134522	0.264099	0.190203	2	CD36/LPL	BP
interleukin-1 binding	1/213	9/16967	0.107498	0.284908	0.229162	1	A2M	MF
interleukin-1 biosynthetic process	1/225	15/17910	0.172801	0.301349	0.21703	1	AGER	BP
interleukin-1 production	3/225	108/17910	0.154715	0.283526	0.204195	3	AGER/CD36/LPL	BP
interleukin-1 receptor activity	1/213	7/16967	0.0846497	0.264037	0.212375	1	IL1RL1	MF
interleukin-1 secretion	2/225	60/17910	0.173979	0.301741	0.217313	2	CD36/LPL	BP
interleukin-10 production	1/225	51/17910	0.475689	0.567472	0.408692	1	AGER	BP
interleukin-12 production	2/225	55/17910	0.15181	0.27901	0.200942	2	AGER/CD36	BP
interleukin-13 production	1/225	25/17910	0.27114	0.391293	0.281808	1	IL33	BP
interleukin-18-mediated signaling pathway	1/225	8/17910	0.0962107	0.224003	0.161326	1	ALOX5	BP
interleukin-2 biosynthetic process	1/225	22/17910	0.242928	0.364187	0.262286	1	SFTPD	BP
interleukin-2 production	2/225	62/17910	0.182989	0.310212	0.223414	2	VSIG4/SFTPD	BP
interleukin-33-mediated signaling pathway	2/225	3/17910	0.000467482	0.00614543	0.00442592	2	IL1RL1/IL33	BP
interleukin-4 production	1/225	32/17910	0.332963	0.448639	0.323109	1	IL33	BP
interleukin-5 production	2/225	22/17910	0.0307729	0.127254	0.091648	2	IL1RL1/IL33	BP
interleukin-6 biosynthetic process	1/225	27/17910	0.289363	0.408543	0.294231	1	AGER	BP
interleukin-6 production	5/225	149/17910	0.0400826	0.142263	0.102457	5	AGER/CD36/LPL/KLF2/IL33	BP
interleukin-6 secretion	1/225	45/17910	0.434255	0.53444	0.384902	1	LPL	BP
interleukin-7-mediated signaling pathway	1/225	30/17910	0.315852	0.434297	0.312779	1	IL7R	BP
interleukin-8 binding	1/213	3/16967	0.0371927	0.194696	0.156601	1	A2M	MF
intermediate filament	5/226	206/18675	0.105539	0.246457	0.181158	5	NME1/DSP/KRT15/KRT17/PKP1	CC
intermediate filament binding	2/213	15/16967	0.014791	0.125411	0.100873	2	NME1/PKP1	MF
intermediate filament bundle assembly	1/225	6/17910	0.0730587	0.190736	0.137367	1	PKP1	BP
intermediate filament cytoskeleton	5/226	245/18675	0.176671	0.333839	0.245388	5	NME1/DSP/KRT15/KRT17/PKP1	CC
intermediate filament cytoskeleton organization	3/225	42/17910	0.0156693	0.0800254	0.057634	3	DSP/KRT17/PKP1	BP
intermediate filament organization	3/225	22/17910	0.00252563	0.0206953	0.0149047	3	DSP/KRT17/PKP1	BP
intermediate filament-based process	3/225	43/17910	0.0166916	0.0830775	0.0598321	3	DSP/KRT17/PKP1	BP
interspecies interaction between organisms	19/225	928/17910	0.0251178	0.109988	0.0792128	19	CD36/TOP2A/CD93/LAMP3/HMGA1/CCNA2/MRC1/KPNA2/HYAL1/GAPDH/CAV2/CDK1/CENPA/NECTIN4/AQP1/SFTPD/MMP1/LYZ/SLPI	BP
interstrand cross-link repair	1/225	50/17910	0.468999	0.56252	0.405125	1	UBE2T	BP
intestinal absorption	1/225	36/17910	0.365916	0.475515	0.342464	1	CD36	BP
intestinal cholesterol absorption	1/225	13/17910	0.151603	0.27901	0.200942	1	CD36	BP
intestinal lipid absorption	1/225	15/17910	0.172801	0.301349	0.21703	1	CD36	BP
intracellular cGMP-activated cation channel activity	1/213	4/16967	0.0492817	0.209887	0.16882	1	AQP1	MF
intracellular cyclic nucleotide activated cation channel activity	1/213	8/16967	0.0961456	0.274014	0.220399	1	AQP1	MF
intracellular distribution of mitochondria	1/225	8/17910	0.0962107	0.224003	0.161326	1	LRRK2	BP
intracellular estrogen receptor signaling pathway	1/225	57/17910	0.5141	0.599581	0.431816	1	TP63	BP
intracellular ligand-gated ion channel activity	1/213	25/16967	0.270981	0.444498	0.357526	1	AQP1	MF
intracellular non-membrane-bounded organelle	56/226	4464/18675	0.403451	0.579785	0.42617	56	MYZAP/TEK/ANKRD1/LDB2/AGER/PTPN21/RGCC/FABP4/FGD5/PECAM1/CAVIN2/UBE2T/TOP2A/NME1/CCNB1/CLDN5/TNS1/TPX2/MYBL2/NUSAP1/KIF20A/CEP55/NEK2/CCNB2/FGR/HMGA1/KIF4A/DLGAP5/AURKA/RECQL4/AURKB/CDC6/BUB1B/CDT1/PRC1/NCAPH/KLF2/GAPDH/CDK1/CENPA/SLC2A1/ZNF385B/FERMT1/ETV4/LAD1/IL33/DSP/SELENBP1/GPRC5A/MYH11/TNS4/ALOX15B/KRT15/KRT17/PKP1/TP63	CC
intracellular protein transport	7/225	833/17910	0.903438	0.916672	0.660184	7	CD36/AGTR2/KPNA2/LRRK2/FERMT1/MMP12/SFN	BP
intracellular receptor signaling pathway	5/225	271/17910	0.255081	0.37768	0.272004	5	CRABP2/NR4A1/ALOX15B/PRAME/TP63	BP
intracellular region of host	1/226	9/18675	0.103811	0.243807	0.17921	1	AQP1	CC
intracellular signal transduction	49/225	2624/17910	0.00247821	0.0204579	0.0147337	49	MYZAP/TEK/ANKRD1/TMEM100/AGER/RGCC/NPR1/ADRB2/SH2D3C/FGD5/PECAM1/ADRB1/CD36/ARHGAP31/FGFR4/CCNB1/SELP/TPX2/CEP55/FGR/MARCO/AURKA/CCNA2/AGTR2/AURKB/C5AR1/LRRK2/FOXM1/DOK2/A2M/CAV2/CDK1/ZNF385B/CSF3/PBK/NDNF/AQP1/HBEGF/DUSP1/IL7R/EDN1/FBP1/COL3A1/IGFBP3/PERP/RRAD/SFN/SOX2/TP63	BP
intracellular signal transduction involved in G1 DNA damage checkpoint	5/225	57/17910	0.000736677	0.00828855	0.00596938	5	RGCC/CCNB1/AURKA/CDK1/SFN	BP
intracellular steroid hormone receptor signaling pathway	1/225	128/17910	0.802897	0.832571	0.599615	1	TP63	BP
intracellular transport	15/225	1546/17910	0.883289	0.90035	0.648429	15	ADRB2/EMP2/FOXF1/CD36/FGR/HMGA1/KIF4A/AGTR2/KPNA2/LRRK2/FERMT1/MMP12/CDH3/SFN/SERPINA1	BP
intracellular transport of virus	1/225	57/17910	0.5141	0.599581	0.431816	1	KPNA2	BP
intracellular vesicle	54/226	2182/18675	1.86732e-07	6.39556e-06	4.70105e-06	54	VEGFD/MCEMP1/S1PR1/ADRB2/EMP2/FGD5/PECAM1/ADRB1/RETN/CD36/AOC3/FGFR4/CD93/SELP/VWF/SFTPC/HSD17B6/OSCAR/FGR/LAMP3/OLR1/MARCO/MSR1/MRC1/HYAL1/C5AR1/LRRK2/PPBP/A2M/CAV2/SLC2A1/COLEC12/ACKR1/ALOX5/ANXA3/IL33/HBEGF/SFTPD/DSP/IL7R/SFTPA1/PROM2/EDN1/NRGN/COL1A1/THBS2/GPRC5A/MYH11/LYZ/STEAP4/SLPI/SFTPB/SERPINA1/PKP1	CC
intramembranous ossification	1/225	6/17910	0.0730587	0.190736	0.137367	1	COL1A1	BP
intrinsic apoptotic signaling pathway	5/225	277/17910	0.269349	0.391293	0.281808	5	LRRK2/ZNF385B/PERP/SFN/TP63	BP
intrinsic apoptotic signaling pathway by p53 class mediator	3/225	75/17910	0.0684365	0.189139	0.136217	3	ZNF385B/PERP/TP63	BP
intrinsic apoptotic signaling pathway in response to DNA damage	2/225	92/17910	0.321824	0.441276	0.317806	2	SFN/TP63	BP
intrinsic apoptotic signaling pathway in response to DNA damage by p53 class mediator	1/225	43/17910	0.419732	0.522661	0.376419	1	TP63	BP
intrinsic apoptotic signaling pathway in response to endoplasmic reticulum stress	1/225	59/17910	0.526271	0.610243	0.439495	1	LRRK2	BP
intrinsic component of membrane	68/226	4976/18675	0.135622	0.288064	0.211741	68	TEK/MCEMP1/TMEM100/AGER/ACVRL1/LYVE1/ECSCR/S1PR1/NPR1/ADRB2/GPA33/CDH5/EMP2/CLDN18/VIPR1/PECAM1/HHIP/CLEC14A/CD36/AOC3/SPN/FGFR4/CLDN5/LRRC32/CD93/ESAM/IL1RL1/SELP/OSCAR/SLC46A2/SCARA5/AQP4/LAMP3/OLR1/MARCO/MGAT3/MSR1/MRC1/AGTR2/TGFBR2/C5AR1/CD52/VSIG4/SUSD2/CAV2/MYRF/SLC2A1/COLEC12/ALOX5AP/NECTIN4/ACKR1/AQP1/SLC7A5/HBEGF/LARGE2/C7/IL7R/PROM2/GJB2/CDH3/B3GNT3/GPRC5A/ALPL/PERP/COL17A1/STEAP4/DSG3/…	CC
intrinsic component of plasma membrane	34/226	1231/18675	5.40164e-06	0.000130288	9.5768e-05	34	TEK/AGER/ACVRL1/LYVE1/S1PR1/ADRB2/GPA33/VIPR1/HHIP/CD36/SPN/FGFR4/LRRC32/SELP/SCARA5/AQP4/OLR1/MARCO/MSR1/MRC1/AGTR2/C5AR1/CD52/CAV2/SLC2A1/AQP1/HBEGF/C7/PROM2/GJB2/B3GNT3/GPRC5A/PERP/COL17A1	CC
ion channel activity	2/213	329/16967	0.920816	0.955601	0.768625	2	AQP1/CLCA2	MF
ion channel binding	3/213	116/16967	0.17892	0.36137	0.290663	3	FHL1/CDH5/LRRK2	MF
ion channel regulator activity	1/213	104/16967	0.7323	0.833354	0.670297	1	ADRB2	MF
ion gated channel activity	3/213	267/16967	0.654663	0.769658	0.619064	3	SCN7A/AQP1/CLCA2	MF
ion homeostasis	16/225	669/17910	0.0105803	0.0594453	0.0428123	16	FHL1/S1PR1/NPR1/CCL23/SCN7A/CD36/FGFR4/SCARA5/AGTR2/PDK4/LRRK2/CD52/C7/EDN1/CXCL13/STEAP4	BP
ion transmembrane transport	10/225	1028/17910	0.837922	0.861635	0.620546	10	FHL1/ADRB2/SCN7A/SLC39A8/SCARA5/CACNA2D2/AQP1/SLC7A5/RRAD/CLCA2	BP
ion transmembrane transporter activity	5/213	672/16967	0.928042	0.956646	0.769466	5	SCN7A/SLC2A1/AQP1/SLC7A5/CLCA2	MF
ion transport	15/225	1533/17910	0.875749	0.893692	0.643634	15	FHL1/FABP4/ADRB2/SCN7A/CD36/SLC39A8/SCARA5/CACNA2D2/AGTR2/SLC2A1/AQP1/SLC7A5/EDN1/RRAD/CLCA2	BP
iron ion binding	4/213	144/16967	0.107905	0.284908	0.229162	4	RRM2/CYP4B1/ALOX5/ALOX15B	MF
iron ion homeostasis	2/225	74/17910	0.238149	0.362415	0.26101	2	SCARA5/STEAP4	BP
iron ion transmembrane transport	1/225	12/17910	0.140802	0.268154	0.193124	1	SCARA5	BP
iron ion transport	1/225	56/17910	0.507898	0.594695	0.428297	1	SCARA5	BP
isomerase activity	1/213	122/16967	0.787075	0.863027	0.694164	1	TOP2A	MF
isoprenoid binding	1/213	36/16967	0.365723	0.535682	0.430868	1	CRABP2	MF
isoprenoid biosynthetic process	1/225	22/17910	0.242928	0.364187	0.262286	1	CRABP2	BP
isoprenoid catabolic process	1/225	8/17910	0.0962107	0.224003	0.161326	1	AKR1B10	BP
isoprenoid metabolic process	3/225	121/17910	0.195017	0.323424	0.232929	3	LPL/CRABP2/AKR1B10	BP
JAK-STAT cascade	1/225	140/17910	0.830835	0.855539	0.616156	1	PECAM1	BP
JNK cascade	3/225	200/17910	0.460957	0.556805	0.401009	3	AGER/SH2D3C/EDN1	BP
keratan sulfate biosynthetic process	2/225	28/17910	0.0479545	0.156268	0.112544	2	OGN/B3GNT3	BP
keratan sulfate catabolic process	1/225	12/17910	0.140802	0.268154	0.193124	1	OGN	BP
keratan sulfate metabolic process	2/225	33/17910	0.0643271	0.180482	0.129983	2	OGN/B3GNT3	BP
keratinization	12/225	224/17910	2.74691e-05	0.000718241	0.000517275	12	DSP/CDH3/PERP/SFN/KRT15/KRT17/PKP1/DSG3/DSC3/SPRR2D/SPRR3/PI3	BP
keratinocyte development	1/225	12/17910	0.140802	0.268154	0.193124	1	SFN	BP
keratinocyte differentiation	14/225	298/17910	2.5719e-05	0.000690983	0.000497643	14	DSP/CDH3/PERP/ALOX15B/SFN/KRT15/KRT17/PKP1/DSG3/TP63/DSC3/SPRR2D/SPRR3/PI3	BP
keratinocyte migration	2/225	19/17910	0.0233461	0.103909	0.0748348	2	FERMT1/HBEGF	BP
keratinocyte proliferation	4/225	43/17910	0.00203872	0.0177209	0.0127625	4	FERMT1/CDH3/SFN/TP63	BP
kidney development	4/225	276/17910	0.457712	0.554534	0.399373	4	TEK/PECAM1/AGTR2/LRRK2	BP
kidney epithelium development	2/225	140/17910	0.527138	0.610609	0.439759	2	PECAM1/AGTR2	BP
kidney morphogenesis	2/225	95/17910	0.335625	0.451266	0.325	2	AGTR2/LRRK2	BP
kidney vasculature development	2/225	26/17910	0.0419063	0.145931	0.105099	2	TEK/PECAM1	BP
killing by host of symbiont cells	1/225	12/17910	0.140802	0.268154	0.193124	1	GAPDH	BP
killing by symbiont of host cells	1/225	4/17910	0.0493163	0.156268	0.112544	1	GAPDH	BP
killing of cells in other organism involved in symbiotic interaction	1/225	15/17910	0.172801	0.301349	0.21703	1	GAPDH	BP
killing of cells of other organism	2/225	60/17910	0.173979	0.301741	0.217313	2	GAPDH/LYZ	BP
kinase activator activity	2/213	74/16967	0.237899	0.416322	0.334863	2	RGCC/CCNB1	MF
kinase activity	17/213	664/16967	0.00435182	0.0606432	0.0487775	17	TEK/ACVRL1/NPR1/NME1/FGFR4/NEK2/FGR/AURKA/CCNA2/AURKB/PDK4/TGFBR2/BUB1B/LRRK2/CDK1/LTBP4/PBK	MF
kinase binding	21/213	647/16967	6.8062e-05	0.00409733	0.00329563	21	ACVRL1/RGCC/NPR1/EMP2/TOP2A/CCNB1/TPX2/KIF20A/FGR/AURKA/CCNA2/AURKB/CDC6/TGFBR2/PRC1/FOXM1/DOK2/SLC2A1/DUSP1/DSP/SFN	MF
kinase inhibitor activity	1/213	64/16967	0.555161	0.68485	0.55085	1	SFN	MF
kinase regulator activity	3/213	154/16967	0.305053	0.485014	0.390115	3	RGCC/CCNB1/SFN	MF
kinesin binding	1/213	40/16967	0.397046	0.560377	0.450731	1	PRC1	MF
kinetochore	6/226	131/18675	0.00524168	0.0279783	0.0205654	6	CCNB1/NEK2/AURKB/BUB1B/CDT1/CENPA	CC
kinetochore assembly	1/225	16/17910	0.183202	0.310212	0.223414	1	CENPA	BP
kinetochore organization	2/225	20/17910	0.0257285	0.11149	0.0802948	2	CDT1/CENPA	BP
L-alanine catabolic process	1/225	4/17910	0.0493163	0.156268	0.112544	1	GPT2	BP
L-alanine metabolic process	1/225	4/17910	0.0493163	0.156268	0.112544	1	GPT2	BP
L-alpha-amino acid transmembrane transport	1/225	49/17910	0.462225	0.556805	0.401009	1	SLC7A5	BP
L-amino acid transport	1/225	58/17910	0.520224	0.604972	0.435699	1	SLC7A5	BP
L-ascorbic acid metabolic process	1/225	9/17910	0.10757	0.234674	0.169011	1	SLC2A1	BP
L-proline biosynthetic process	1/225	5/17910	0.0612622	0.17431	0.125538	1	PYCR1	BP
L-serine biosynthetic process	1/225	7/17910	0.0847076	0.207349	0.149332	1	PSAT1	BP
L-serine metabolic process	1/225	10/17910	0.118787	0.24699	0.177881	1	PSAT1	BP
lactation	1/225	49/17910	0.462225	0.556805	0.401009	1	NME1	BP
lactose biosynthetic process	1/225	3/17910	0.037219	0.135873	0.0978554	1	SLC2A1	BP
lactose metabolic process	1/225	3/17910	0.037219	0.135873	0.0978554	1	SLC2A1	BP
lamellar body	4/226	17/18675	4.39212e-05	0.000774645	0.000569402	4	SFTPC/LAMP3/SFTPA1/SFTPB	CC
lamellipodium	1/226	191/18675	0.903433	0.979712	0.720137	1	FGD5	CC
lamellipodium assembly	1/225	61/17910	0.538138	0.618984	0.44579	1	S1PR1	BP
lamellipodium organization	1/225	79/17910	0.632468	0.691937	0.498331	1	S1PR1	BP
lamin binding	1/213	13/16967	0.151505	0.330456	0.265798	1	PKP1	MF
late endosome	3/226	240/18675	0.557673	0.723905	0.532106	3	SFTPC/LRRK2/SFTPB	CC
late endosome lumen	2/226	9/18675	0.00496314	0.027198	0.0199919	2	SFTPC/SFTPB	CC
late endosome to lysosome transport	1/225	7/17910	0.0847076	0.207349	0.149332	1	LRRK2	BP
lateral mesoderm development	1/225	14/17910	0.162269	0.289472	0.208477	1	FOXF1	BP
lateral mesoderm formation	1/225	4/17910	0.0493163	0.156268	0.112544	1	FOXF1	BP
lateral mesoderm morphogenesis	1/225	4/17910	0.0493163	0.156268	0.112544	1	FOXF1	BP
lateral mesodermal cell differentiation	1/225	3/17910	0.037219	0.135873	0.0978554	1	FOXF1	BP
lateral plasma membrane	1/226	58/18675	0.507011	0.678866	0.499	1	GJB2	CC
lateral sprouting from an epithelium	1/225	13/17910	0.151603	0.27901	0.200942	1	TP63	BP
lateral ventricle development	1/225	11/17910	0.129864	0.257699	0.185594	1	AQP1	BP
leading edge membrane	4/226	153/18675	0.115175	0.258671	0.190136	4	FGD5/NME1/FGR/FERMT1	CC
learning	3/225	142/17910	0.26446	0.385896	0.277921	3	CLDN5/NRGN/FOS	BP
learning or memory	4/225	247/17910	0.376116	0.485817	0.349883	4	AGER/CLDN5/NRGN/FOS	BP
lens development in camera-type eye	1/225	68/17910	0.57739	0.64986	0.468027	1	TGFBR2	BP
lens fiber cell apoptotic process	1/225	4/17910	0.0493163	0.156268	0.112544	1	TGFBR2	BP
leukocyte activation	32/225	1186/17910	3.48146e-05	0.00085267	0.00061409	32	MCEMP1/AGER/FOXF1/PECAM1/RETN/CD36/SPN/LRRC32/CD93/IL1RL1/OSCAR/SLC46A2/FGR/OLR1/TGFBR2/C5AR1/LRRK2/VSIG4/PPBP/HMGB3/ALOX5/ANXA3/IL33/SFTPD/DSP/IL7R/EDN1/C1QA/LYZ/SLPI/SERPINA1/PKP1	BP
leukocyte activation involved in immune response	20/225	684/17910	0.000412552	0.00571723	0.00411753	20	MCEMP1/FOXF1/PECAM1/RETN/CD36/SPN/CD93/OSCAR/FGR/OLR1/C5AR1/PPBP/ALOX5/ANXA3/IL33/DSP/LYZ/SLPI/SERPINA1/PKP1	BP
leukocyte activation involved in inflammatory response	5/225	50/17910	0.000400253	0.00561494	0.00404386	5	AGER/C5AR1/LRRK2/IL33/C1QA	BP
leukocyte adhesion to vascular endothelial cell	2/225	45/17910	0.109548	0.237469	0.171025	2	SPN/SELP	BP
leukocyte apoptotic process	4/225	103/17910	0.0409455	0.144515	0.10408	4	GIMAP8/SLC46A2/AURKB/IL7R	BP
leukocyte cell-cell adhesion	9/225	328/17910	0.0231943	0.103909	0.0748348	9	AGER/PECAM1/SPN/LRRC32/SELP/TGFBR2/VSIG4/SFTPD/IL7R	BP
leukocyte chemotaxis	9/225	188/17910	0.000634217	0.00747735	0.00538516	9	VEGFD/S1PR1/CCL23/C5AR1/DUSP1/SFTPD/EDN1/CXCL13/CXCL14	BP
leukocyte degranulation	18/225	532/17910	0.000140664	0.0024358	0.00175426	18	MCEMP1/FOXF1/PECAM1/RETN/CD36/CD93/OSCAR/FGR/OLR1/C5AR1/PPBP/ALOX5/ANXA3/DSP/LYZ/SLPI/SERPINA1/PKP1	BP
leukocyte differentiation	11/225	485/17910	0.0431884	0.149691	0.107807	11	AGER/CLDN18/NME1/SPN/OSCAR/SLC46A2/TGFBR2/HMGB3/CSF3/IL7R/FOS	BP
leukocyte homeostasis	2/225	84/17910	0.284727	0.40572	0.292198	2	SLC46A2/CCNB2	BP
leukocyte mediated cytotoxicity	3/225	97/17910	0.123004	0.253617	0.182654	3	AGER/EMP2/IL7R	BP
leukocyte mediated immunity	24/225	814/17910	9.51685e-05	0.00181065	0.00130403	24	MCEMP1/AGER/EMP2/FOXF1/PECAM1/RETN/CD36/CD93/OSCAR/FGR/OLR1/C5AR1/PPBP/ALOX5/ANXA3/C7/DSP/IL7R/C1QA/C1QB/LYZ/SLPI/SERPINA1/PKP1	BP
leukocyte migration	21/225	467/17910	4.83125e-07	3.69258e-05	2.65938e-05	21	TEK/VEGFD/AGER/S1PR1/PECAM1/CCL23/SPN/ESAM/SELP/OLR1/C5AR1/DOK2/IL33/SLC7A5/DUSP1/SFTPD/EDN1/MMP1/COL1A1/CXCL13/CXCL14	BP
leukocyte proliferation	8/225	270/17910	0.0210972	0.0972184	0.0700163	8	AGER/SPN/LRRC32/TGFBR2/VSIG4/IL33/SFTPD/IL7R	BP
leukocyte tethering or rolling	2/225	25/17910	0.0389988	0.139872	0.100735	2	SPN/SELP	BP
leukotriene biosynthetic process	2/225	19/17910	0.0233461	0.103909	0.0748348	2	ALOX5AP/ALOX5	BP
leukotriene metabolic process	2/225	31/17910	0.0575748	0.17431	0.125538	2	ALOX5AP/ALOX5	BP
ligand-gated cation channel activity	1/213	91/16967	0.684218	0.790594	0.635904	1	AQP1	MF
ligand-gated channel activity	2/213	114/16967	0.420283	0.576471	0.463676	2	AQP1/CLCA2	MF
ligand-gated ion channel activity	2/213	114/16967	0.420283	0.576471	0.463676	2	AQP1/CLCA2	MF
LIM domain binding	1/213	7/16967	0.0846497	0.264037	0.212375	1	LDB2	MF
limb development	2/225	176/17910	0.651413	0.708815	0.510486	2	CRABP2/TP63	BP
limb morphogenesis	2/225	146/17910	0.54979	0.628311	0.452508	2	CRABP2/TP63	BP
limbic system development	2/225	106/17910	0.385422	0.494522	0.356153	2	NME1/ANXA3	BP
linoleic acid metabolic process	1/225	17/17910	0.193473	0.321584	0.231604	1	ALOX15B	BP
lipase activity	1/213	100/16967	0.718338	0.822129	0.661268	1	LPL	MF
lipid binding	11/213	643/16967	0.186268	0.36289	0.291886	11	S1PR1/FABP4/CAVIN2/CD36/SELP/LPL/ALOX5AP/ANXA3/CRABP2/PROM2/ALOX15B	MF
lipid biosynthetic process	10/225	676/17910	0.344293	0.459714	0.331084	10	GPD1/FGFR4/HSD17B6/LPL/PDK4/ALOX5AP/ALOX5/CRABP2/EDN1/ALOX15B	BP
lipid catabolic process	5/225	300/17910	0.325411	0.443179	0.319176	5	FABP4/HSD17B6/LPL/SPP1/AKR1B10	BP
lipid digestion	1/225	17/17910	0.193473	0.321584	0.231604	1	CD36	BP
lipid droplet	2/226	70/18675	0.207779	0.371292	0.272918	2	FABP4/GAPDH	CC
lipid homeostasis	3/225	132/17910	0.230891	0.357186	0.257244	3	FABP4/FGFR4/LPL	BP
lipid localization	9/225	366/17910	0.0421768	0.14654	0.105538	9	FABP4/RETN/CD36/MSR1/LPL/AGTR2/SPP1/SFTPA1/EDN1	BP
lipid metabolic process	18/225	1338/17910	0.416652	0.521021	0.375238	18	GPD1/TEK/ANKRD1/FABP4/CD36/FGFR4/HSD17B6/FGR/LPL/PDK4/SPP1/ALOX5AP/ALOX5/CRABP2/EDN1/ALOX15B/SFTPB/AKR1B10	BP
lipid modification	1/225	192/17910	0.912879	0.925193	0.666321	1	PDK4	BP
lipid oxidation	1/225	95/17910	0.700071	0.746013	0.537276	1	PDK4	BP
lipid storage	3/225	64/17910	0.0465964	0.156268	0.112544	3	CD36/MSR1/LPL	BP
lipid transport	8/225	332/17910	0.058995	0.17431	0.125538	8	FABP4/RETN/CD36/MSR1/AGTR2/SPP1/SFTPA1/EDN1	BP
lipid transporter activity	2/213	103/16967	0.371669	0.538203	0.432896	2	FABP4/SFTPA1	MF
lipophagy	1/225	6/17910	0.0730587	0.190736	0.137367	1	ADRB2	BP
lipopolysaccharide binding	1/213	30/16967	0.315676	0.491051	0.394971	1	SELP	MF
lipopolysaccharide-mediated signaling pathway	1/225	55/17910	0.501618	0.588585	0.423897	1	CD36	BP
lipoprotein localization	1/225	17/17910	0.193473	0.321584	0.231604	1	CD36	BP
lipoprotein particle	2/226	37/18675	0.0736671	0.19789	0.145459	2	MSR1/LPL	CC
lipoprotein particle binding	4/213	34/16967	0.00083347	0.01965	0.0158052	4	CD36/MSR1/LPL/COLEC12	MF
lipoprotein particle mediated signaling	2/225	3/17910	0.000467482	0.00614543	0.00442592	2	CD36/LPL	BP
lipoprotein particle receptor activity	1/213	14/16967	0.162165	0.342537	0.275515	1	CD36	MF
lipoprotein transport	1/225	17/17910	0.193473	0.321584	0.231604	1	CD36	BP
lipoxin biosynthetic process	2/225	6/17910	0.00227979	0.0191771	0.0138113	2	ALOX5AP/ALOX5	BP
lipoxin metabolic process	2/225	6/17910	0.00227979	0.0191771	0.0138113	2	ALOX5AP/ALOX5	BP
lipoxygenase pathway	3/225	16/17910	0.000970857	0.00998682	0.00719247	3	ALOX5AP/ALOX5/ALOX15B	BP
liver development	2/225	130/17910	0.487718	0.57831	0.416497	2	CPB2/AURKA	BP
liver morphogenesis	1/225	19/17910	0.213629	0.338705	0.243934	1	CPB2	BP
liver regeneration	2/225	32/17910	0.0609185	0.17431	0.125538	2	CPB2/AURKA	BP
localization of cell	50/225	1611/17910	1.40654e-09	3.66775e-07	2.6415e-07	50	TEK/VEGFD/LDB2/AGER/ACVRL1/RGCC/S1PR1/EMP2/FOXF1/PECAM1/SPOCK2/CCL23/CLEC14A/MMRN2/SPN/FGFR4/ESAM/TNS1/SELP/CTHRC1/FGR/OLR1/MGAT3/AGTR2/HYAL1/TGFBR2/C5AR1/LRRK2/DOK2/CDK1/DUOX1/ANXA3/FERMT1/ATOH8/IL33/NDNF/SLC7A5/HBEGF/DUSP1/SFTPD/MMP12/EDN1/NR4A1/MMP1/COL1A1/COL3A1/IGFBP3/ALOX15B/CXCL13/CXCL14	BP
locomotion	54/225	1835/17910	1.759e-09	3.89881e-07	2.80791e-07	54	TEK/VEGFD/LDB2/AGER/ACVRL1/ECSCR/RGCC/S1PR1/EMP2/FOXF1/PECAM1/SPOCK2/CCL23/CLEC14A/MMRN2/SPN/FGFR4/ESAM/TNS1/SELP/CTHRC1/FGR/OLR1/MGAT3/AGTR2/HYAL1/TGFBR2/C5AR1/LRRK2/DOK2/CAV2/CDK1/DUOX1/ANXA3/FERMT1/ATOH8/IL33/NDNF/SLC7A5/SEMA3B/HBEGF/DUSP1/SFTPD/CXCL2/MMP12/EDN1/NR4A1/MMP1/COL1A1/COL3A1/IGFBP3/ALOX15B/CXCL13/CXCL14	BP
locomotory behavior	2/225	194/17910	0.703161	0.748766	0.539259	2	LRRK2/FOXA2	BP
locomotory exploration behavior	1/225	12/17910	0.140802	0.268154	0.193124	1	LRRK2	BP
long-chain fatty acid binding	2/213	14/16967	0.0129247	0.125411	0.100873	2	FABP4/ALOX5AP	MF
long-chain fatty acid biosynthetic process	2/225	25/17910	0.0389988	0.139872	0.100735	2	ALOX5/ALOX15B	BP
long-chain fatty acid import	1/225	10/17910	0.118787	0.24699	0.177881	1	CD36	BP
long-chain fatty acid metabolic process	2/225	94/17910	0.331033	0.448219	0.322806	2	ALOX5/ALOX15B	BP
long-chain fatty acid transport	2/225	64/17910	0.192065	0.321584	0.231604	2	FABP4/CD36	BP
long-chain fatty acid transporter activity	1/213	5/16967	0.0612196	0.230339	0.18527	1	FABP4	MF
long-term synaptic depression	1/225	28/17910	0.298305	0.416728	0.300126	1	AGER	BP
long-term synaptic potentiation	2/225	74/17910	0.238149	0.362415	0.26101	2	AGER/NRGN	BP
low-density lipoprotein particle	1/226	14/18675	0.156772	0.30393	0.223404	1	MSR1	CC
low-density lipoprotein particle binding	3/213	15/16967	0.000793991	0.01965	0.0158052	3	CD36/MSR1/COLEC12	MF
low-density lipoprotein particle clearance	1/225	44/17910	0.427039	0.527796	0.380117	1	CD36	BP
low-density lipoprotein particle mediated signaling	2/225	3/17910	0.000467482	0.00614543	0.00442592	2	CD36/LPL	BP
low-density lipoprotein particle receptor activity	1/213	12/16967	0.14071	0.317255	0.25518	1	CD36	MF
lung alveolus development	2/225	40/17910	0.0898271	0.217479	0.156627	2	FOXF1/SFTPD	BP
lung cell differentiation	1/225	21/17910	0.233285	0.357186	0.257244	1	KLF2	BP
lung development	5/225	169/17910	0.062342	0.176476	0.127098	5	FOXF1/HHIP/TGFBR2/KLF2/SFTPD	BP
lung epithelial cell differentiation	1/225	20/17910	0.223519	0.349263	0.251538	1	KLF2	BP
lung epithelium development	1/225	34/17910	0.349647	0.462959	0.333421	1	KLF2	BP
lung lobe development	2/225	7/17910	0.00316532	0.0246412	0.0177465	2	FOXF1/TGFBR2	BP
lung lobe morphogenesis	2/225	7/17910	0.00316532	0.0246412	0.0177465	2	FOXF1/TGFBR2	BP
lung morphogenesis	3/225	50/17910	0.0248745	0.109394	0.078785	3	FOXF1/HHIP/TGFBR2	BP
lung vasculature development	1/225	6/17910	0.0730587	0.190736	0.137367	1	FOXF1	BP
luteinization	1/225	10/17910	0.118787	0.24699	0.177881	1	RETN	BP
lyase activity	1/213	168/16967	0.881515	0.927748	0.746222	1	NPR1	MF
lymph node development	1/225	17/17910	0.193473	0.321584	0.231604	1	IL7R	BP
lymph vessel development	1/225	23/17910	0.252451	0.374787	0.26992	1	ACVRL1	BP
lymph vessel morphogenesis	1/225	18/17910	0.203614	0.330995	0.238381	1	ACVRL1	BP
lymphangiogenesis	1/225	15/17910	0.172801	0.301349	0.21703	1	ACVRL1	BP
lymphatic endothelial cell differentiation	1/225	7/17910	0.0847076	0.207349	0.149332	1	ACVRL1	BP
lymphocyte activation	9/225	630/17910	0.395189	0.503557	0.36266	9	AGER/SPN/LRRC32/SLC46A2/TGFBR2/VSIG4/HMGB3/SFTPD/IL7R	BP
lymphocyte activation involved in immune response	1/225	158/17910	0.865523	0.884477	0.636998	1	SPN	BP
lymphocyte apoptotic process	4/225	67/17910	0.0100265	0.0571307	0.0411453	4	GIMAP8/SLC46A2/AURKB/IL7R	BP
lymphocyte chemotaxis	2/225	42/17910	0.0975812	0.225184	0.162176	2	CXCL13/CXCL14	BP
lymphocyte differentiation	5/225	325/17910	0.387579	0.496685	0.357711	5	SPN/SLC46A2/TGFBR2/HMGB3/IL7R	BP
lymphocyte homeostasis	2/225	60/17910	0.173979	0.301741	0.217313	2	SLC46A2/CCNB2	BP
lymphocyte mediated immunity	6/225	293/17910	0.164436	0.293102	0.211091	6	AGER/EMP2/C7/IL7R/C1QA/C1QB	BP
lymphocyte migration	4/225	87/17910	0.0240167	0.106253	0.0765234	4	S1PR1/SPN/CXCL13/CXCL14	BP
lymphocyte proliferation	7/225	244/17910	0.0348535	0.135873	0.0978554	7	AGER/SPN/LRRC32/TGFBR2/VSIG4/SFTPD/IL7R	BP
lysosomal lumen	2/226	94/18675	0.315117	0.49058	0.3606	2	OGN/HYAL1	CC
lysosomal membrane	1/226	344/18675	0.985412	0.999937	0.735003	1	LAMP3	CC
lysosomal protein catabolic process	1/225	11/17910	0.129864	0.257699	0.185594	1	MGAT3	BP
lysosomal transport	2/225	94/17910	0.331033	0.448219	0.322806	2	ADRB2/LRRK2	BP
lysosome	11/226	659/18675	0.17678	0.333839	0.245388	11	ADRB2/RETN/LAMP3/OGN/PEBP4/HYAL1/LRRK2/SFTPD/LYZ/SFTPB/AKR1B10	CC
lysosome localization	2/225	67/17910	0.205785	0.333179	0.239955	2	FOXF1/FGR	BP
lysosome organization	1/225	57/17910	0.5141	0.599581	0.431816	1	LRRK2	BP
lysozyme activity	1/213	9/16967	0.107498	0.284908	0.229162	1	LYZ	MF
lytic vacuole	11/226	659/18675	0.17678	0.333839	0.245388	11	ADRB2/RETN/LAMP3/OGN/PEBP4/HYAL1/LRRK2/SFTPD/LYZ/SFTPB/AKR1B10	CC
lytic vacuole membrane	1/226	344/18675	0.985412	0.999937	0.735003	1	LAMP3	CC
lytic vacuole organization	1/225	57/17910	0.5141	0.599581	0.431816	1	LRRK2	BP
macroautophagy	4/225	272/17910	0.446627	0.54648	0.393573	4	ADRB2/LRRK2/GAPDH/HSPB8	BP
macromolecule biosynthetic process	62/225	4806/17910	0.428157	0.528844	0.380872	62	ANKRD1/TMEM100/AGER/ACVRL1/RGCC/S1PR1/FABP4/ADRB2/FOXF1/CD36/TOP2A/SPN/FGFR4/CCNB1/MYBL2/RRM2/NEK2/OGN/CHRDL1/HMGA1/MGAT3/DLGAP5/CCNA2/RECQL4/AGTR2/AURKB/HYAL1/CDC6/PID1/C5AR1/LRRK2/CDT1/FOXM1/KLF2/GAPDH/CDK1/MYRF/SPP1/CDCA7/ANXA3/CSF3/FOSB/ETV4/ATOH8/CRABP2/IL33/HBEGF/LARGE2/DUSP1/SFTPD/MMP12/EDN1/FBP1/NR4A1/COL1A1/B3GNT3/FOS/FOXA2/PRAME/KRT17/SOX2/TP63	BP
macromolecule catabolic process	17/225	1226/17910	0.372342	0.482629	0.347588	17	LYVE1/ECSCR/UBE2C/CCNB1/LAMP3/OGN/MGAT3/AURKA/AURKB/HYAL1/BUB1B/LRRK2/CDK1/PBK/IL33/MMP12/PKP1	BP
macromolecule deacylation	1/225	88/17910	0.67217	0.723945	0.521382	1	LRRK2	BP
macromolecule glycosylation	3/225	228/17910	0.5483	0.628066	0.452331	3	MGAT3/LARGE2/B3GNT3	BP
macromolecule localization	44/225	2735/17910	0.0474647	0.156268	0.112544	44	ANKRD1/AGER/RGCC/FABP4/EMP2/CLDN18/RETN/CD36/LRRC32/IL1RL1/KIF20A/CEP55/CACNA2D2/FGR/MGAT3/MSR1/AURKA/LPL/AGTR2/KPNA2/AURKB/PID1/TGFBR2/BUB1B/LRRK2/CDT1/GAPDH/CDK1/SPP1/CENPA/SLC2A1/FERMT1/IL33/DSP/SFTPA1/MMP12/EDN1/COL1A1/SELENBP1/TNS4/FOXA2/ALOX15B/SFN/TP63	BP
macromolecule methylation	1/225	276/17910	0.970298	0.975358	0.70245	1	FOS	BP
macromolecule modification	64/225	4027/17910	0.0210258	0.0972184	0.0700163	64	TEK/GDF10/AGER/ACVRL1/PTPN21/RGCC/NPR1/FABP4/ADRB2/SH2D3C/EMP2/PECAM1/SPOCK2/UBE2T/CD36/PPP1R14B/UBE2C/FGFR4/CCNB1/TPX2/NEK2/CCNB2/FGR/CHRDL1/MARCO/MGAT3/DLGAP5/AURKA/CCNA2/AGTR2/AURKB/CDC6/PID1/PDK4/TGFBR2/C5AR1/BUB1B/LRRK2/FOXM1/GAPDH/CAV2/CDK1/SPP1/CDKN3/CSF3/PBK/IL33/NDNF/HSPB8/HBEGF/LARGE2/DUSP1/DSP/PROM2/EDN1/B3GNT3/GPRC5A/COL3A1/FOS/IGFBP3/SFN/SERPINA1/SOX2/PI3	BP
macrophage activation	8/225	96/17910	2.81155e-05	0.000720439	0.000518858	8	AGER/CD93/IL1RL1/C5AR1/LRRK2/VSIG4/IL33/C1QA	BP
macrophage activation involved in immune response	1/225	12/17910	0.140802	0.268154	0.193124	1	IL33	BP
macrophage chemotaxis	2/225	35/17910	0.0713301	0.190736	0.137367	2	C5AR1/SFTPD	BP
macrophage cytokine production	1/225	16/17910	0.183202	0.310212	0.223414	1	CD36	BP
macrophage derived foam cell differentiation	4/225	36/17910	0.00104212	0.0105956	0.00763094	4	CD36/MSR1/LPL/ALOX15B	BP
macrophage migration	2/225	50/17910	0.130274	0.257699	0.185594	2	C5AR1/SFTPD	BP
macrophage proliferation	1/225	8/17910	0.0962107	0.224003	0.161326	1	IL33	BP
magnesium ion binding	3/213	209/16967	0.489449	0.630939	0.507487	3	TOP2A/NME1/LRRK2	MF
maintenance of cell number	3/225	160/17910	0.326053	0.443752	0.319589	3	LDB2/SOX2/TP63	BP
maintenance of location	3/225	286/17910	0.700063	0.746013	0.537276	3	CD36/MSR1/LPL	BP
male gamete generation	3/225	525/17910	0.962725	0.968459	0.697481	3	CCNB1/LRRK2/TP63	BP
male pronucleus	1/226	6/18675	0.0704579	0.193631	0.142328	1	CCNA2	CC
mammary gland alveolus development	1/225	18/17910	0.203614	0.330995	0.238381	1	FOXF1	BP
mammary gland development	3/225	138/17910	0.250948	0.374787	0.26992	3	FOXF1/NME1/TGFBR2	BP
mammary gland epithelial cell differentiation	1/225	17/17910	0.193473	0.321584	0.231604	1	FOXF1	BP
mammary gland epithelium development	1/225	67/17910	0.571993	0.64537	0.464794	1	FOXF1	BP
mammary gland lobule development	1/225	18/17910	0.203614	0.330995	0.238381	1	FOXF1	BP
mammary gland morphogenesis	1/225	43/17910	0.419732	0.522661	0.376419	1	TGFBR2	BP
manganese ion binding	1/213	58/16967	0.52	0.654818	0.526694	1	LARGE2	MF
mannose binding	1/213	15/16967	0.172691	0.353606	0.284418	1	MRC1	MF
mannosylation	2/225	31/17910	0.0575748	0.17431	0.125538	2	ALG1L/LARGE2	BP
mannosyltransferase activity	1/213	21/16967	0.233144	0.409191	0.329127	1	ALG1L	MF
MAP kinase kinase activity	1/213	13/16967	0.151505	0.330456	0.265798	1	LRRK2	MF
MAP kinase phosphatase activity	1/213	9/16967	0.107498	0.284908	0.229162	1	DUSP1	MF
MAP kinase tyrosine/serine/threonine phosphatase activity	1/213	7/16967	0.0846497	0.264037	0.212375	1	DUSP1	MF
MAPK cascade	18/225	882/17910	0.0296578	0.124737	0.0898352	18	TEK/AGER/ADRB2/SH2D3C/CD36/FGFR4/MARCO/C5AR1/LRRK2/FOXM1/CAV2/CDK1/PBK/HBEGF/DUSP1/EDN1/IGFBP3/SOX2	BP
mast cell activation	2/225	57/17910	0.160611	0.289472	0.208477	2	FOXF1/FGR	BP
mast cell activation involved in immune response	2/225	45/17910	0.109548	0.237469	0.171025	2	FOXF1/FGR	BP
mast cell chemotaxis	1/225	9/17910	0.10757	0.234674	0.169011	1	VEGFD	BP
mast cell degranulation	2/225	43/17910	0.101527	0.232234	0.167254	2	FOXF1/FGR	BP
mast cell mediated immunity	2/225	45/17910	0.109548	0.237469	0.171025	2	FOXF1/FGR	BP
mast cell migration	1/225	10/17910	0.118787	0.24699	0.177881	1	VEGFD	BP
maternal placenta development	2/225	35/17910	0.0713301	0.190736	0.137367	2	SPP1/GJB2	BP
maternal process involved in female pregnancy	2/225	64/17910	0.192065	0.321584	0.231604	2	SPP1/GJB2	BP
maternal process involved in parturition	1/225	8/17910	0.0962107	0.224003	0.161326	1	EDN1	BP
mating	1/225	40/17910	0.397249	0.504152	0.363089	1	PI3	BP
MDM2/MDM4 family protein binding	1/213	8/16967	0.0961456	0.274014	0.220399	1	TP63	MF
mechanoreceptor differentiation	1/225	58/17910	0.520224	0.604972	0.435699	1	CTHRC1	BP
meiosis I	1/225	88/17910	0.67217	0.723945	0.521382	1	AURKA	BP
meiosis I cell cycle process	1/225	91/17910	0.684431	0.734111	0.528704	1	AURKA	BP
meiotic cell cycle	5/225	203/17910	0.113224	0.244146	0.175833	5	TOP2A/NEK2/AURKA/NCAPH/DUSP1	BP
meiotic cell cycle process	3/225	151/17910	0.295151	0.416159	0.299716	3	TOP2A/AURKA/NCAPH	BP
meiotic chromosome condensation	1/225	3/17910	0.037219	0.135873	0.0978554	1	NCAPH	BP
meiotic chromosome segregation	1/225	67/17910	0.571993	0.64537	0.464794	1	NCAPH	BP
meiotic chromosome separation	1/225	14/17910	0.162269	0.289472	0.208477	1	NCAPH	BP
meiotic nuclear division	3/225	142/17910	0.26446	0.385896	0.277921	3	TOP2A/AURKA/NCAPH	BP
meiotic spindle	1/226	10/18675	0.114661	0.258671	0.190136	1	AURKA	CC
meiotic spindle organization	1/225	12/17910	0.140802	0.268154	0.193124	1	AURKA	BP
melanin biosynthetic process	1/225	21/17910	0.233285	0.357186	0.257244	1	CDH3	BP
melanin metabolic process	1/225	22/17910	0.242928	0.364187	0.262286	1	CDH3	BP
melanosome	2/226	105/18675	0.363603	0.545404	0.400899	2	SLC2A1/MYH11	CC
melanosome localization	1/225	24/17910	0.261854	0.383102	0.275909	1	CDH3	BP
melanosome transport	1/225	20/17910	0.223519	0.349263	0.251538	1	CDH3	BP
membrane assembly	2/225	32/17910	0.0609185	0.17431	0.125538	2	EMP2/CAV2	BP
membrane attack complex	1/226	7/18675	0.0817106	0.207303	0.152378	1	C7	CC
membrane biogenesis	2/225	37/17910	0.0785672	0.200743	0.144574	2	EMP2/CAV2	BP
membrane depolarization	3/225	81/17910	0.0819761	0.207349	0.149332	3	FHL1/LRRK2/EDN1	BP
membrane disassembly	3/225	16/17910	0.000970857	0.00998682	0.00719247	3	CCNB1/CCNB2/CDK1	BP
membrane docking	3/225	150/17910	0.291726	0.411723	0.296522	3	NEK2/CAV2/CDK1	BP
membrane fusion	2/225	117/17910	0.433546	0.53444	0.384902	2	STX11/CAV2	BP
membrane invagination	4/225	58/17910	0.0060559	0.0392482	0.0282665	4	CD36/MARCO/MSR1/AURKB	BP
membrane lipid metabolic process	1/225	191/17910	0.911759	0.92448	0.665807	1	SFTPB	BP
membrane microdomain	12/226	310/18675	0.000414031	0.00447808	0.00329161	12	TEK/S1PR1/EMP2/PECAM1/CAVIN2/CD36/OLR1/TGFBR2/LRRK2/CAV2/SLC2A1/PROM2	CC
membrane organization	20/225	730/17910	0.00092697	0.00980983	0.007065	20	STX11/ADRB2/EMP2/CAVIN2/CD36/CCNB1/KIF20A/CEP55/CCNB2/MARCO/MSR1/AURKB/CAV2/CDK1/MYRF/HBEGF/IL7R/SFN/SERPINA1/TP63	BP
membrane protein complex	2/226	947/18675	0.999904	0.999937	0.735003	2	C7/GJB2	CC
membrane raft	12/226	309/18675	0.000402222	0.00446793	0.00328415	12	TEK/S1PR1/EMP2/PECAM1/CAVIN2/CD36/OLR1/TGFBR2/LRRK2/CAV2/SLC2A1/PROM2	CC
membrane raft assembly	2/225	12/17910	0.00954484	0.0545965	0.0393202	2	EMP2/CAV2	BP
membrane raft organization	2/225	23/17910	0.0334296	0.134721	0.0970259	2	EMP2/CAV2	BP
membrane region	12/226	321/18675	0.000564492	0.00552396	0.00406038	12	TEK/S1PR1/EMP2/PECAM1/CAVIN2/CD36/OLR1/TGFBR2/LRRK2/CAV2/SLC2A1/PROM2	CC
membranous septum morphogenesis	1/225	10/17910	0.118787	0.24699	0.177881	1	TGFBR2	BP
mesenchymal cell development	1/225	65/17910	0.560992	0.637824	0.459359	1	EDN1	BP
mesenchymal cell differentiation	6/225	199/17910	0.0400467	0.142249	0.102447	6	TMEM100/RGCC/TGFBR2/EDN1/COL1A1/FOXA2	BP
mesenchymal cell proliferation	2/225	45/17910	0.109548	0.237469	0.171025	2	FOXF1/TGFBR2	BP
mesenchyme development	8/225	258/17910	0.0165483	0.0830775	0.0598321	8	TMEM100/ACVRL1/RGCC/FOXF1/TGFBR2/EDN1/COL1A1/FOXA2	BP
mesenchyme migration	1/225	5/17910	0.0612622	0.17431	0.125538	1	FOXF1	BP
mesenchyme morphogenesis	4/225	51/17910	0.00381832	0.028211	0.0203175	4	TMEM100/ACVRL1/FOXF1/TGFBR2	BP
mesoderm development	2/225	128/17910	0.479593	0.571208	0.411382	2	FOXF1/TP63	BP
mesoderm formation	1/225	71/17910	0.593178	0.661524	0.476427	1	FOXF1	BP
mesoderm morphogenesis	1/225	73/17910	0.603376	0.669361	0.482071	1	FOXF1	BP
mesodermal cell differentiation	1/225	35/17910	0.357833	0.470007	0.338498	1	FOXF1	BP
mesonephric epithelium development	1/225	99/17910	0.71494	0.757488	0.54554	1	AGTR2	BP
mesonephric tubule development	1/225	99/17910	0.71494	0.757488	0.54554	1	AGTR2	BP
mesonephric tubule morphogenesis	1/225	67/17910	0.571993	0.64537	0.464794	1	AGTR2	BP
mesonephros development	1/225	103/17910	0.729075	0.769521	0.554206	1	AGTR2	BP
messenger ribonucleoprotein complex	1/226	6/18675	0.0704579	0.193631	0.142328	1	PKP1	CC
metal ion binding	49/213	4068/16967	0.656652	0.769658	0.619064	49	ACVRL1/FHL1/FGD5/HHIP/SPOCK2/CPB2/TOP2A/AOC3/NME1/CD93/SELP/RRM2/CACNA2D2/NEK2/LPL/AURKB/TGFBR2/CYP4B1/LRRK2/MT1M/KLF2/COLEC12/ZNF385B/ALOX5/DUOX1/ANXA3/LTBP4/MMP11/LARGE2/COL10A1/MMP12/GJB2/FBP1/NR4A1/MMP1/COL1A1/THBS2/ALPL/COL3A1/IGFBP3/COL11A1/ALOX15B/STEAP4/MMP13/DSG3/MMP10/TP63/DSC3/CLCA2	MF
metal ion homeostasis	12/225	531/17910	0.0364912	0.135873	0.0978554	12	S1PR1/NPR1/CCL23/SCN7A/CD36/SCARA5/AGTR2/CD52/C7/EDN1/CXCL13/STEAP4	BP
[truncated: 3,447 more rows]

## Sheet: additional file 6 table S6 KEGG
Pathway	Pathway Identifier	GeneRatio	BgRatio	pvalue	p.adjust	qvalue	Count	geneID	Other
Herpes simplex virus 1 infection	hsa05168	9/136	79/7914	7.45e-06	0.00147517	0.00134891	9	CPB2/VWF/C5AR1/VSIG4/A2M/C7/C1QA/C1QB/SERPINA1	Organismal Systems
Retinol metabolism	hsa00830	6/136	49/7914	0.000175737	0.0145422	0.0132975	6	PECAM1/CD36/SELP/ACKR1/CSF3/THBS2	Human Diseases
Metabolism of xenobiotics by cytochrome P450	hsa00980	7/136	72/7914	0.000220336	0.0145422	0.0132975	7	CCNB1/RRM2/CCNB2/CDK1/IGFBP3/PERP/SFN	Cellular Processes
Drug metabolism - other enzymes	hsa00983	6/136	69/7914	0.0011379	0.0467171	0.0427185	6	NPR1/ADRB2/ADRB1/AQP1/EDN1/CLCA2	Organismal Systems
Chemical carcinogenesis - DNA adducts	hsa05204	9/136	152/7914	0.00117973	0.0467171	0.0427185	9	CD36/OLR1/MARCO/MSR1/MRC1/COLEC12/SFTPD/SFTPA1/THBS2	Cellular Processes
Drug metabolism - cytochrome P450	hsa00982	8/136	129/7914	0.00164843	0.0543983	0.0497422	8	VEGFD/TGFBR2/EDN1/MMP1/COL1A1/COL3A1/FOS/MMP13	Organismal Systems
Bile secretion	hsa04976	8/136	139/7914	0.00263877	0.0746395	0.0682509	8	CDH5/PECAM1/KLF2/CAV2/DUSP1/EDN1/FOS/NQO1	Human Diseases
Metabolic pathways	hsa01100	8/136	147/7914	0.00372504	0.0876062	0.0801077	8	CDH5/CLDN18/PECAM1/SPN/CLDN5/ESAM/SELP/CDH3	Environmental Information Processing
Butanoate metabolism	hsa00650	12/136	294/7914	0.00457529	0.0876062	0.0801077	12	GDF10/ACVRL1/CCL23/IL1RL1/TGFBR2/PPBP/CSF3/IL33/IL7R/CXCL2/CXCL13/CXCL14	Environmental Information Processing
Primary bile acid biosynthesis	hsa00120	6/136	93/7914	0.00517659	0.0876062	0.0801077	6	CSF3/FOSB/CXCL2/MMP1/FOS/MMP13	Organismal Systems
Complement and coagulation cascades	hsa04610	7/136	124/7914	0.00538651	0.0876062	0.0801077	7	CCNB1/CCNB2/CCNA2/CDC6/BUB1B/CDK1/SFN	Cellular Processes
Lysine degradation	hsa00310	6/136	95/7914	0.00574048	0.0876062	0.0801077	6	CPB2/COL10A1/COL1A1/COL3A1/COL11A1/COL17A1	Organismal Systems
Fatty acid degradation	hsa00071	6/136	96/7914	0.00603869	0.0876062	0.0801077	6	SELP/C5AR1/C1QA/C1QB/KRT15/KRT17	Human Diseases
ABC transporters	hsa02010	8/136	160/7914	0.00619438	0.0876062	0.0801077	8	CCNB1/MYBL2/CCNB2/CCNA2/TGFBR2/FOXM1/CDK1/IGFBP3	Cellular Processes
Cell cycle	hsa04110	6/136	100/7914	0.00734539	0.0969591	0.0886601	6	VEGFD/AGER/TGFBR2/EDN1/COL1A1/COL3A1	Human Diseases
PPAR signaling pathway	hsa03320	5/136	76/7914	0.00970213	0.120064	0.109787	5	FABP4/CD36/OLR1/LPL/MMP1	Organismal Systems
Notch signaling pathway	hsa04330	4/136	55/7914	0.0144674	0.168503	0.15408	4	NPR1/FABP4/ADRB2/ADRB1	Organismal Systems
Peroxisome	hsa04146	5/136	88/7914	0.0174902	0.192392	0.175925	5	CD36/VWF/SPP1/COL1A1/THBS2	Environmental Information Processing
Steroid hormone biosynthesis	hsa00140	3/136	35/7914	0.02176	0.22533	0.206044	3	C7/C1QA/C1QB	Human Diseases
Phenylalanine metabolism	hsa00360	4/136	63/7914	0.0227606	0.22533	0.206044	4	GPX3/ALOX5/ALOX15B/GPX2	Metabolism
Biotin metabolism	hsa00780	6/136	131/7914	0.0250984	0.236642	0.216387	6	S1PR1/CCNB1/CCNB2/TGFBR2/KLF2/IL7R	Environmental Information Processing
2-Oxocarboxylic acid metabolism	hsa01210	5/136	98/7914	0.0264993	0.238494	0.218081	5	CCNB1/CCNB2/AURKA/CCNA2/CDK1	Organismal Systems
Morphine addiction	hsa05032	5/136	100/7914	0.0285992	0.246202	0.225129	5	CCL23/PPBP/CXCL2/CXCL13/CXCL14	Environmental Information Processing
Tryptophan metabolism	hsa00380	4/136	75/7914	0.0397421	0.327873	0.299809	4	PYCR1/GAPDH/PSAT1/GPT2	Metabolism
Amphetamine addiction	hsa05031	4/136	76/7914	0.041411	0.327975	0.299903	4	SFTPA1/C1QA/C1QB/FOS	Human Diseases
Arginine biosynthesis	hsa00220	5/136	112/7914	0.0433974	0.330488	0.302201	5	CDH5/CLDN18/PECAM1/CLDN5/ESAM	Organismal Systems
Mannose type O-glycan biosynthesis	hsa00515	4/136	90/7914	0.0688765	0.497501	0.454918	4	ADRB2/ADRB1/CST1/LYZ	Organismal Systems
Purine metabolism	hsa00230	3/136	56/7914	0.0712485	0.497501	0.454918	3	RRM2/GPX3/GPX2	Metabolism
Wnt signaling pathway	hsa04310	2/136	26/7914	0.0728663	0.497501	0.454918	2	ALPL/AKR1B10	Metabolism
Caffeine metabolism	hsa00232	4/136	93/7914	0.0757386	0.499875	0.457089	4	TEK/CXCL2/MMP1/FOS	Human Diseases
Phenylalanine, tyrosine and tryptophan biosynthesis	hsa00400	10/136	354/7914	0.0831946	0.531372	0.48589	10	TEK/VEGFD/FGFR4/VWF/SPP1/CSF3/IL7R/NR4A1/COL1A1/THBS2	Environmental Information Processing
D-Amino acid metabolism	hsa00470	4/136	102/7914	0.0982883	0.592853	0.542109	4	TGFBR2/C1QA/C1QB/FOS	Human Diseases
Valine, leucine and isoleucine degradation	hsa00280	1/136	6/7914	0.0988088	0.592853	0.542109	1	PSAT1	Metabolism
Cocaine addiction	hsa05030	6/136	189/7914	0.106657	0.620368	0.567269	6	CCL23/FGR/PPBP/CXCL2/CXCL13/CXCL14	Organismal Systems
Pertussis	hsa05133	2/136	33/7914	0.109661	0.620368	0.567269	2	FBP1/AKR1B10	Metabolism
Synaptic vesicle cycle	hsa04721	5/136	149/7914	0.113401	0.623704	0.570319	5	ADRB2/ADRB1/SCN7A/CACNA2D2/AGTR2	Organismal Systems
Hepatocellular carcinoma	hsa05225	4/136	109/7914	0.117748	0.630113	0.57618	4	TEK/GAPDH/SLC2A1/EDN1	Environmental Information Processing
Maturity onset diabetes of the young	hsa04950	3/136	72/7914	0.126424	0.631652	0.577588	3	AQP4/SLC2A1/AQP1	Organismal Systems
Fluid shear stress and atherosclerosis	hsa05418	4/136	112/7914	0.126567	0.631652	0.577588	4	VEGFD/CXCL2/EDN1/FOS	Environmental Information Processing
Ascorbate and aldarate metabolism	hsa00053	6/136	199/7914	0.127607	0.631652	0.577588	6	VEGFD/VWF/CAV2/SPP1/COL1A1/THBS2	Cellular Processes
Glutathione metabolism	hsa00480	8/136	295/7914	0.134932	0.651623	0.595849	8	TEK/VEGFD/FGFR4/CACNA2D2/TGFBR2/DUSP1/NR4A1/FOS	Environmental Information Processing
Insulin secretion	hsa04911	4/136	117/7914	0.141862	0.668779	0.611536	4	GAPDH/PSAT1/GPT2/FBP1	Metabolism
Fatty acid metabolism	hsa01212	2/136	40/7914	0.150189	0.691568	0.632375	2	AOC3/PSAT1	Metabolism
cAMP signaling pathway	hsa04024	2/136	41/7914	0.156203	0.700625	0.640656	2	HBEGF/MMP1	Human Diseases
Pentose and glucuronate interconversions	hsa00040	1/136	10/7914	0.159233	0.700625	0.640656	1	SELENBP1	Metabolism
Propanoate metabolism	hsa00640	6/136	216/7914	0.167386	0.704397	0.644106	6	NPR1/ADRB2/ADRB1/HHIP/EDN1/FOS	Environmental Information Processing
GnRH signaling pathway	hsa04912	1/136	11/7914	0.1737	0.704397	0.644106	1	NQO1	Metabolism
Arachidonic acid metabolism	hsa00590	4/136	127/7914	0.174481	0.704397	0.644106	4	CCNB1/CCNB2/AURKA/CDK1	Cellular Processes
Oocyte meiosis	hsa04114	6/136	219/7914	0.174905	0.704397	0.644106	6	CCNB2/CCNA2/TGFBR2/BUB1B/SLC2A1/FOS	Human Diseases
Cortisol synthesis and secretion	hsa04927	4/136	128/7914	0.177878	0.704397	0.644106	4	OSCAR/TGFBR2/FOSB/FOS	Organismal Systems
Prostate cancer	hsa05215	2/136	50/7914	0.211999	0.811053	0.741632	2	CD36/LPL	Organismal Systems
Aminoacyl-tRNA biosynthesis	hsa00970	4/136	138/7914	0.213004	0.811053	0.741632	4	HBEGF/FOS/KRT15/KRT17	Organismal Systems
Shigellosis	hsa05131	3/136	98/7914	0.2373	0.875925	0.800952	3	CD36/CSF3/IL7R	Organismal Systems
Dopaminergic synapse	hsa04728	1/136	16/7914	0.242409	0.875925	0.800952	1	ALPL	Metabolism
Ubiquinone and other terpenoid-quinone biosynthesis	hsa00130	1/136	17/7914	0.255454	0.875925	0.800952	1	AOC3	Metabolism
Inflammatory mediator regulation of TRP channels	hsa04750	1/136	17/7914	0.255454	0.875925	0.800952	1	INMT	Metabolism
Renin secretion	hsa04924	3/136	102/7914	0.255741	0.875925	0.800952	3	CXCL2/COL1A1/COL3A1	Human Diseases
Melanogenesis	hsa04916	2/136	57/7914	0.256584	0.875925	0.800952	2	NME1/RRM2	Metabolism
Adherens junction	hsa04520	5/136	201/7914	0.263641	0.88476	0.809031	5	CLDN18/CLDN5/GAPDH/MYH11/FOS	Human Diseases
Non-homologous end-joining	hsa03450	1/136	18/7914	0.268276	0.885312	0.809536	1	GPT2	Metabolism
Glucagon signaling pathway	hsa04922	3/136	106/7914	0.274378	0.886765	0.810864	3	HBEGF/FOS/MMP13	Organismal Systems
Parathyroid hormone synthesis, secretion and action	hsa04928	1/136	19/7914	0.28088	0.886765	0.810864	1	HYAL1	Metabolism
Porphyrin metabolism	hsa00860	2/136	61/7914	0.28218	0.886765	0.810864	2	LPL/AKR1B10	Metabolism
Thyroid hormone synthesis	hsa04918	11/136	530/7914	0.302027	0.886765	0.810864	11	VEGFD/HHIP/FGFR4/CCNA2/TGFBR2/SLC2A1/IL7R/EDN1/MMP1/FOS/NQO1	Human Diseases
Biosynthesis of amino acids	hsa01230	1/136	21/7914	0.305443	0.886765	0.810864	1	GPT2	Metabolism
Chronic myeloid leukemia	hsa05220	3/136	115/7914	0.316744	0.886765	0.810864	3	ALOX5/DUSP1/ALOX15B	Organismal Systems
Vasopressin-regulated water reabsorption	hsa04962	2/136	68/7914	0.326745	0.886765	0.810864	2	GAPDH/FBP1	Metabolism
Basal transcription factors	hsa03022	2/136	68/7914	0.326745	0.886765	0.810864	2	ALOX5AP/ALOX5	Organismal Systems
Glycosphingolipid biosynthesis - ganglio series	hsa00604	2/136	68/7914	0.326745	0.886765	0.810864	2	FOSB/FOS	Human Diseases
Alcoholism	hsa05034	1/136	23/7914	0.329173	0.886765	0.810864	1	LARGE2	Metabolism
Adrenergic signaling in cardiomyocytes	hsa04261	1/136	23/7914	0.329173	0.886765	0.810864	1	AGTR2	Organismal Systems
Ribosome	hsa03010	1/136	23/7914	0.329173	0.886765	0.810864	1	AQP1	Organismal Systems
Cushing syndrome	hsa04934	2/136	69/7914	0.333062	0.886765	0.810864	2	CD36/SLC2A1	Organismal Systems
Vibrio cholerae infection	hsa05110	2/136	69/7914	0.333062	0.886765	0.810864	2	SLC2A1/SLC7A5	Human Diseases
AMPK signaling pathway	hsa04152	2/136	70/7914	0.339362	0.886765	0.810864	2	HBEGF/CXCL2	Human Diseases
Fatty acid biosynthesis	hsa00061	3/136	120/7914	0.340374	0.886765	0.810864	3	CD36/CCNA2/FBP1	Environmental Information Processing
Steroid biosynthesis	hsa00100	2/136	71/7914	0.345645	0.888801	0.812726	2	TGFBR2/NECTIN4	Cellular Processes
GABAergic synapse	hsa04727	3/136	124/7914	0.359248	0.892985	0.816552	3	VWF/COL1A1/COL3A1	Organismal Systems
MicroRNAs in cancer	hsa05206	1/136	26/7914	0.363268	0.892985	0.816552	1	FOXA2	Human Diseases
One carbon pool by folate	hsa00670	2/136	74/7914	0.364373	0.892985	0.816552	2	GPX3/GPX2	Organismal Systems
Fanconi anemia pathway	hsa03460	7/136	340/7914	0.367592	0.892985	0.816552	7	S1PR1/ADRB2/VIPR1/ADRB1/AGTR2/C5AR1/EDN1	Environmental Information Processing
Pathogenic Escherichia coli infection	hsa05130	1/136	27/7914	0.374246	0.892985	0.816552	1	B3GNT3	Metabolism
Legionellosis	hsa05134	2/136	77/7914	0.382898	0.892985	0.816552	2	CACNA2D2/DSP	Human Diseases
Relaxin signaling pathway	hsa04926	3/136	130/7914	0.387412	0.892985	0.816552	3	NPR1/NME1/RRM2	Metabolism
Terpenoid backbone biosynthesis	hsa00900	2/136	79/7914	0.395122	0.892985	0.816552	2	NME1/RRM2	Metabolism
Vascular smooth muscle contraction	hsa04270	3/136	132/7914	0.396741	0.892985	0.816552	3	NPR1/EDN1/MYH11	Organismal Systems
Staphylococcus aureus infection	hsa05150	4/136	186/7914	0.397517	0.892985	0.816552	4	CCNA2/TGFBR2/ETV4/IGFBP3	Human Diseases
Dilated cardiomyopathy (DCM)	hsa05414	2/136	80/7914	0.401193	0.892985	0.816552	2	CXCL2/FOS	Human Diseases
Proximal tubule bicarbonate reclamation	hsa04964	3/136	133/7914	0.401392	0.892985	0.816552	3	C7/C1QA/C1QB	Human Diseases
Endocrine resistance	hsa01522	1/136	30/7914	0.406066	0.893345	0.816881	1	FBP1	Metabolism
Progesterone-mediated oocyte maturation	hsa04914	1/136	31/7914	0.416311	0.90582	0.828288	1	AKR1B10	Metabolism
Vitamin digestion and absorption	hsa04977	1/136	33/7914	0.436279	0.919998	0.841253	1	AOC3	Metabolism
Ubiquitin mediated proteolysis	hsa04120	2/136	86/7914	0.436998	0.919998	0.841253	2	TGFBR2/FOS	Human Diseases
Longevity regulating pathway - multiple species	hsa04213	1/136	34/7914	0.446007	0.919998	0.841253	1	AKR1B10	Metabolism
AGE-RAGE signaling pathway in diabetic complications	hsa04933	1/136	34/7914	0.446007	0.919998	0.841253	1	STX11	Genetic Information Processing
Glycosylphosphatidylinositol (GPI)-anchor biosynthesis	hsa00563	2/136	88/7914	0.448679	0.919998	0.841253	2	ADRB1/CDK1	Cellular Processes
Human papillomavirus infection	hsa05165	2/136	90/7914	0.460224	0.919998	0.841253	2	CACNA2D2/EDN1	Human Diseases
Basal cell carcinoma	hsa05217	1/136	36/7914	0.464965	0.919998	0.841253	1	GPT2	Metabolism
Signaling pathways regulating pluripotency of stem cells	hsa04550	1/136	36/7914	0.464965	0.919998	0.841253	1	AOC3	Metabolism
Chagas disease	hsa05142	1/136	37/7914	0.474202	0.919998	0.841253	1	SFN	Organismal Systems
T cell receptor signaling pathway	hsa04660	1/136	38/7914	0.48328	0.919998	0.841253	1	IL7R	Human Diseases
Fatty acid elongation	hsa00062	3/136	153/7914	0.491755	0.919998	0.841253	3	NPR1/CACNA2D2/FOS	Organismal Systems
Glycosphingolipid biosynthesis - lacto and neolacto series	hsa00601	2/136	96/7914	0.494004	0.919998	0.841253	2	ADRB1/CACNA2D2	Human Diseases
Collecting duct acid secretion	hsa04966	4/136	212/7914	0.496906	0.919998	0.841253	4	CCNB1/CCNB2/CDK1/FOS	Human Diseases
Insulin resistance	hsa04931	1/136	40/7914	0.500972	0.919998	0.841253	1	SLC39A8	Cellular Processes
Gastric cancer	hsa05226	2/136	98/7914	0.504967	0.919998	0.841253	2	HBEGF/FOS	Human Diseases
Epithelial cell signaling in Helicobacter pylori infection	hsa05120	2/136	98/7914	0.504967	0.919998	0.841253	2	NPR1/NR4A1	Organismal Systems
Citrate cycle (TCA cycle)	hsa00020	1/136	41/7914	0.509591	0.919998	0.841253	1	CD36	Organismal Systems
Pentose phosphate pathway	hsa00030	1/136	42/7914	0.518063	0.919998	0.841253	1	INMT	Metabolism
Glyoxylate and dicarboxylate metabolism	hsa00630	2/136	102/7914	0.526431	0.919998	0.841253	2	CPB2/CLCA2	Organismal Systems
Mucin type O-glycan biosynthesis	hsa00512	3/136	162/7914	0.530251	0.919998	0.841253	3	FHL1/CSF3/IL7R	Environmental Information Processing
Hippo signaling pathway	hsa04390	3/136	162/7914	0.530251	0.919998	0.841253	3	CCNA2/TGFBR2/FOS	Human Diseases
Platinum drug resistance	hsa01524	1/136	44/7914	0.534572	0.919998	0.841253	1	AQP4	Organismal Systems
Autophagy - other	hsa04136	2/136	104/7914	0.536928	0.919998	0.841253	2	SPP1/FOS	Organismal Systems
Fructose and mannose metabolism	hsa00051	2/136	106/7914	0.547266	0.919998	0.841253	2	SLC2A1/FBP1	Organismal Systems
beta-Alanine metabolism	hsa00410	3/136	167/7914	0.550934	0.919998	0.841253	3	NPR1/ADRB2/ADRB1	Environmental Information Processing
Carbon metabolism	hsa01200	2/136	107/7914	0.552374	0.919998	0.841253	2	TGFBR2/FOS	Organismal Systems
Leishmaniasis	hsa05140	2/136	108/7914	0.557443	0.919998	0.841253	2	CD36/SLC2A1	Human Diseases
SNARE interactions in vesicular transport	hsa04130	3/136	169/7914	0.559058	0.919998	0.841253	3	CLDN18/CLDN5/MYH11	Cellular Processes
Viral carcinogenesis	hsa05203	1/136	49/7914	0.573431	0.919998	0.841253	1	PSAT1	Metabolism
Thyroid hormone signaling pathway	hsa04919	1/136	49/7914	0.573431	0.919998	0.841253	1	MGAT3	Metabolism
Prion diseases	hsa05020	1/136	49/7914	0.573431	0.919998	0.841253	1	ALOX5	Organismal Systems
RNA degradation	hsa03018	1/136	49/7914	0.573431	0.919998	0.841253	1	FOSB	Human Diseases
Alanine, aspartate and glutamate metabolism	hsa00250	1/136	50/7914	0.580807	0.919998	0.841253	1	PYCR1	Metabolism
Tyrosine metabolism	hsa00350	1/136	50/7914	0.580807	0.919998	0.841253	1	HHIP	Environmental Information Processing
Starch and sucrose metabolism	hsa00500	1/136	54/7914	0.609067	0.957105	0.875183	1	UBE2T	Genetic Information Processing
DNA replication	hsa03030	1/136	56/7914	0.622479	0.958081	0.876076	1	CXCL2	Human Diseases
Salmonella infection	hsa05132	2/136	123/7914	0.628575	0.958081	0.876076	2	LAMP3/HYAL1	Cellular Processes
Pathways in cancer	hsa05200	1/136	58/7914	0.635434	0.958081	0.876076	1	MT1M	Organismal Systems
Lysosome	hsa04142	1/136	60/7914	0.647948	0.958081	0.876076	1	HSD17B6	Metabolism
Nicotinate and nicotinamide metabolism	hsa00760	1/136	62/7914	0.660036	0.958081	0.876076	1	FOXA2	Organismal Systems
African trypanosomiasis	hsa05143	1/136	63/7914	0.665924	0.958081	0.876076	1	IL33	Organismal Systems
Thyroid cancer	hsa05216	1/136	63/7914	0.665924	0.958081	0.876076	1	HHIP	Human Diseases
Platelet activation	hsa04611	1/136	64/7914	0.671711	0.958081	0.876076	1	SPP1	Organismal Systems
Various types of N-glycan biosynthesis	hsa00513	5/136	330/7914	0.675916	0.958081	0.876076	5	VWF/CCNA2/SPP1/COL1A1/THBS2	Human Diseases
Primary immunodeficiency	hsa05340	1/136	65/7914	0.677399	0.958081	0.876076	1	NR4A1	Organismal Systems
Pyruvate metabolism	hsa00620	23/136	1439/7914	0.685135	0.958081	0.876076	23	NPR1/INMT/PYCR1/AOC3/NME1/HSD17B6/RRM2/GPX3/MGAT3/HYAL1/GAPDH/PSAT1/ALOX5/GPT2/LARGE2/FBP1/B3GNT3/SELENBP1/ALPL/ALOX15B/GPX2/NQO1/AKR1B10	Metabolism
ErbB signaling pathway	hsa04012	3/136	204/7914	0.68622	0.958081	0.876076	3	CAV2/HBEGF/COL1A1	Human Diseases
Glycine, serine and threonine metabolism	hsa00260	2/136	137/7914	0.686726	0.958081	0.876076	2	KLF2/SPP1	Environmental Information Processing
Cardiac muscle contraction	hsa04260	1/136	67/7914	0.688482	0.958081	0.876076	1	HSD17B6	Metabolism
Colorectal cancer	hsa05210	1/136	67/7914	0.688482	0.958081	0.876076	1	CCNA2	Human Diseases
Homologous recombination	hsa03440	2/136	140/7914	0.698179	0.958081	0.876076	2	FGFR4/SOX2	Cellular Processes
Fat digestion and absorption	hsa04975	1/136	69/7914	0.699187	0.958081	0.876076	1	SLC2A1	Human Diseases
Bladder cancer	hsa05219	1/136	70/7914	0.704402	0.958081	0.876076	1	FOS	Organismal Systems
Gap junction	hsa04540	3/136	210/7914	0.705061	0.958081	0.876076	3	TEK/VEGFD/FGFR4	Environmental Information Processing
Human T-cell leukemia virus 1 infection	hsa05166	1/136	73/7914	0.719514	0.958081	0.876076	1	TOP2A	Human Diseases
Systemic lupus erythematosus	hsa05322	1/136	73/7914	0.719514	0.958081	0.876076	1	CAV2	Human Diseases
Type I diabetes mellitus	hsa04940	1/136	75/7914	0.72916	0.958081	0.876076	1	TGFBR2	Human Diseases
Hypertrophic cardiomyopathy (HCM)	hsa05410	1/136	76/7914	0.733859	0.958081	0.876076	1	FOS	Human Diseases
IL-17 signaling pathway	hsa04657	1/136	76/7914	0.733859	0.958081	0.876076	1	TGFBR2	Human Diseases
Fc gamma R-mediated phagocytosis	hsa04666	2/136	154/7914	0.747144	0.958081	0.876076	2	TGFBR2/SOX2	Environmental Information Processing
Type II diabetes mellitus	hsa04930	2/136	155/7914	0.750369	0.958081	0.876076	2	CLDN18/CLDN5	Human Diseases
TGF-beta signaling pathway	hsa04350	1/136	82/7914	0.7604	0.958081	0.876076	1	FOS	Organismal Systems
Amino sugar and nucleotide sugar metabolism	hsa00520	3/136	232/7914	0.766831	0.958081	0.876076	3	TEK/VEGFD/FGFR4	Environmental Information Processing
Glycerophospholipid metabolism	hsa00564	1/136	85/7914	0.772668	0.958081	0.876076	1	HBEGF	Environmental Information Processing
Cysteine and methionine metabolism	hsa00270	1/136	86/7914	0.776617	0.958081	0.876076	1	CACNA2D2	Organismal Systems
Ovarian steroidogenesis	hsa04913	1/136	86/7914	0.776617	0.958081	0.876076	1	SLC2A1	Organismal Systems
Aldosterone synthesis and secretion	hsa04925	1/136	89/7914	0.78806	0.958081	0.876076	1	FOS	Human Diseases
Choline metabolism in cancer	hsa05231	2/136	168/7914	0.789187	0.958081	0.876076	2	TGFBR2/NQO1	Human Diseases
Arginine and proline metabolism	hsa00330	3/136	243/7914	0.793581	0.958081	0.876076	3	FGFR4/TGFBR2/CAV2	Cellular Processes
Cholesterol metabolism	hsa04979	2/136	170/7914	0.794668	0.958081	0.876076	2	KPNA2/IL33	Human Diseases
Breast cancer	hsa05224	2/136	171/7914	0.797361	0.958081	0.876076	2	LPL/GAPDH	Human Diseases
Amyotrophic lateral sclerosis (ALS)	hsa05014	1/136	92/7914	0.798921	0.958081	0.876076	1	FOS	Organismal Systems
Pancreatic secretion	hsa04972	1/136	93/7914	0.802417	0.958081	0.876076	1	HBEGF	Organismal Systems
Endocrine and other factor-regulated calcium reabsorption	hsa04961	1/136	94/7914	0.805853	0.958081	0.876076	1	TGFBR2	Environmental Information Processing
Regulation of lipolysis in adipocytes	hsa04923	1/136	97/7914	0.815809	0.958081	0.876076	1	GPD1	Metabolism
Epstein-Barr virus infection	hsa05169	1/136	97/7914	0.815809	0.958081	0.876076	1	FOS	Organismal Systems
Th17 cell differentiation	hsa04659	1/136	98/7914	0.819013	0.958081	0.876076	1	FOS	Human Diseases
Proteoglycans in cancer	hsa05205	2/136	181/7914	0.822629	0.958081	0.876076	2	SEMA3G/SEMA3B	Organismal Systems
Endometrial cancer	hsa05213	1/136	101/7914	0.828299	0.958081	0.876076	1	EDN1	Organismal Systems
VEGF signaling pathway	hsa04370	1/136	102/7914	0.831287	0.958081	0.876076	1	CXCL2	Environmental Information Processing
TNF signaling pathway	hsa04668	2/136	186/7914	0.83418	0.958081	0.876076	2	CXCL2/FOS	Human Diseases
Leukocyte transendothelial migration	hsa04670	1/136	104/7914	0.837111	0.958081	0.876076	1	FOS	Organismal Systems
Long-term depression	hsa04730	2/136	193/7914	0.849221	0.964762	0.882185	2	ADRB2/ADRB1	Environmental Information Processing
Hepatitis B	hsa05161	1/136	112/7914	0.858476	0.964762	0.882185	1	FOS	Organismal Systems
Glutamatergic synapse	hsa04724	1/136	112/7914	0.858476	0.964762	0.882185	1	ALOX5	Human Diseases
Glycerolipid metabolism	hsa00561	2/136	201/7914	0.864894	0.964762	0.882185	2	CCNA2/CDK1	Human Diseases
Nucleocytoplasmic transport	hsa03013	1/136	119/7914	0.874873	0.964762	0.882185	1	S1PR1	Environmental Information Processing
Tight junction	hsa04530	1/136	119/7914	0.874873	0.964762	0.882185	1	SLC2A1	Organismal Systems
Neurotrophin signaling pathway	hsa04722	1/136	120/7914	0.877056	0.964762	0.882185	1	FOS	Human Diseases
Inflammatory bowel disease (IBD)	hsa05321	1/136	131/7914	0.898713	0.97301	0.889727	1	FOS	Organismal Systems
Acute myeloid leukemia	hsa05221	1/136	136/7914	0.90726	0.97301	0.889727	1	UBE2C	Genetic Information Processing
Glycolysis / Gluconeogenesis	hsa00010	1/136	136/7914	0.90726	0.97301	0.889727	1	FOS	Cellular Processes
Fc epsilon RI signaling pathway	hsa04664	1/136	137/7914	0.908882	0.97301	0.889727	1	FBP1	Organismal Systems
Renal cell carcinoma	hsa05211	1/136	138/7914	0.910475	0.97301	0.889727	1	FOS	Human Diseases
Central carbon metabolism in cancer	hsa05230	1/136	142/7914	0.916577	0.97301	0.889727	1	LRRK2	Human Diseases
RIG-I-like receptor signaling pathway	hsa04622	1/136	147/7914	0.923627	0.97301	0.889727	1	FOS	Human Diseases
Prolactin signaling pathway	hsa04917	1/136	149/7914	0.926278	0.97301	0.889727	1	TGFBR2	Human Diseases
Axon guidance	hsa04360	1/136	153/7914	0.93131	0.97301	0.889727	1	SLC7A5	Environmental Information Processing
Bacterial invasion of epithelial cells	hsa05100	1/136	155/7914	0.933696	0.97301	0.889727	1	NR4A1	Human Diseases
Inositol phosphate metabolism	hsa00562	1/136	162/7914	0.941419	0.975921	0.892389	1	IL33	Cellular Processes
Gastric acid secretion	hsa04971	1/136	179/7914	0.956654	0.980135	0.896242	1	MRC1	Human Diseases
Pancreatic cancer	hsa05212	1/136	181/7914	0.958165	0.980135	0.896242	1	CXCL2	Organismal Systems
Oxidative phosphorylation	hsa00190	1/136	184/7914	0.960334	0.980135	0.896242	1	FOSB	Human Diseases
Transcriptional misregulation in cancer	hsa05202	1/136	201/7914	0.970676	0.985609	0.901248	1	CCNA2	Human Diseases
Arrhythmogenic right ventricular cardiomyopathy (ARVC)	hsa05412	1/136	213/7914	0.976316	0.986279	0.90186	1	FGFR4	Cellular Processes
Apoptosis	hsa04210	1/136	231/7914	0.982821	0.98781	0.90326	1	NPR1	Organismal Systems
Autophagy - animal	hsa04140	1/136	310/7914	0.99584	0.99584	0.910603	1	TP63	Human Diseases
Insulin signaling pathway	hsa04910
Estrogen signaling pathway	hsa04915
Endocytosis	hsa04144
Huntington disease	hsa05016
MAPK signaling pathway	hsa04010
Parkinson disease	hsa05012
Cell adhesion molecules (CAMs)	hsa04514
Longevity regulating pathway	hsa04211
PD-L1 expression and PD-1 checkpoint pathway in cancer	hsa05235
Salivary secretion	hsa04970
Phagosome	hsa04145
mRNA surveillance pathway	hsa03015
mTOR signaling pathway	hsa04150
Oxytocin signaling pathway	hsa04921
Th1 and Th2 cell differentiation	hsa04658
Rap1 signaling pathway	hsa04015
Rheumatoid arthritis	hsa05323
Protein digestion and absorption	hsa04974
Circadian entrainment	hsa04713
Cellular senescence	hsa04218
Hematopoietic cell lineage	hsa04640
Protein processing in endoplasmic reticulum	hsa04141
Amoebiasis	hsa05146
cGMP-PKG signaling pathway	hsa04022
Human cytomegalovirus infection	hsa05163
Toll-like receptor signaling pathway	hsa04620
C-type lectin receptor signaling pathway	hsa04625
Thermogenesis	hsa04714
Ras signaling pathway	hsa04014
Cholinergic synapse	hsa04725
Toxoplasmosis	hsa05145
Serotonergic synapse	hsa04726
Sphingolipid signaling pathway	hsa04071
Yersinia infection	hsa05135
Osteoclast differentiation	hsa04380
FoxO signaling pathway	hsa04068
Spliceosome	hsa03040
Apelin signaling pathway	hsa04371
Human immunodeficiency virus 1 infection	hsa05170
Regulation of actin cytoskeleton	hsa04810
Phospholipase D signaling pathway	hsa04072
Retrograde endocannabinoid signaling	hsa04723
Hepatitis C	hsa05160
Jak-STAT signaling pathway	hsa04630
Influenza A	hsa05164
Alzheimer disease	hsa05010
Tuberculosis	hsa05152
NOD-like receptor signaling pathway	hsa04621
Kaposi sarcoma-associated herpesvirus infection	hsa05167
Neuroactive ligand-receptor interaction	hsa04080
Calcium signaling pathway	hsa04020
Focal adhesion	hsa04510
PI3K-Akt signaling pathway	hsa04151
Cytokine-cytokine receptor interaction	hsa04060
