# Supplementary material for: A scoring model based on bacterial lipopolysaccharide-related genes to predict prognosis in NSCLC
Source: Front Genet. 2024 Nov 14;15:1408000. doi: 10.3389/fgene.2024.1408000 (PMC11602480; doi:10.3389/fgene.2024.1408000)
Supplement: Supplementary file 9 [file Table5.xlsx]

## Sheet: NSCLC related LRGs
rownames(data)	p.value	HR	lower	upper	HR (95% CI for HR)
MYZAP	0.166	1.15	0.943	1.41	1.15 (0.943-1.41)
GPD1	0.564	0.958	0.827	1.11	0.958 (0.827-1.11)
TEK	0.316	0.93	0.806	1.07	0.93 (0.806-1.07)
KANK3	0.608	0.952	0.79	1.15	0.952 (0.79-1.15)
ANKRD1	0.0784	1.1	0.989	1.22	1.1 (0.989-1.22)
PRX	0.897	0.991	0.86	1.14	0.991 (0.86-1.14)
VEGFD	0.0202	0.875	0.781	0.979	0.875 (0.781-0.979)
MCEMP1	0.685	0.983	0.905	1.07	0.983 (0.905-1.07)
GDF10	0.0445	0.862	0.745	0.996	0.862 (0.745-0.996)
TMEM100	0.367	0.956	0.867	1.05	0.956 (0.867-1.05)
LDB2	0.549	0.955	0.823	1.11	0.955 (0.823-1.11)
SEMA3G	0.601	0.956	0.808	1.13	0.956 (0.808-1.13)
AGER	0.191	0.964	0.913	1.02	0.964 (0.913-1.02)
ACVRL1	0.483	1.05	0.918	1.2	1.05 (0.918-1.2)
LYVE1	0.419	1.05	0.929	1.19	1.05 (0.929-1.19)
FHL1	0.433	0.963	0.875	1.06	0.963 (0.875-1.06)
ECSCR	0.646	1.04	0.889	1.21	1.04 (0.889-1.21)
PTPN21	0.0781	1.16	0.983	1.37	1.16 (0.983-1.37)
STX11	0.849	1.01	0.896	1.14	1.01 (0.896-1.14)
RGCC	0.726	0.982	0.887	1.09	0.982 (0.887-1.09)
S1PR1	0.714	0.98	0.88	1.09	0.98 (0.88-1.09)
NPR1	0.493	1.04	0.927	1.17	1.04 (0.927-1.17)
FABP4	0.371	1.03	0.964	1.1	1.03 (0.964-1.1)
ADRB2	0.117	0.892	0.774	1.03	0.892 (0.774-1.03)
GPA33	0.295	1.1	0.919	1.32	1.1 (0.919-1.32)
CDH5	0.631	1.03	0.918	1.15	1.03 (0.918-1.15)
INMT	0.0914	0.934	0.863	1.01	0.934 (0.863-1.01)
SH2D3C	0.879	0.989	0.855	1.14	0.989 (0.855-1.14)
EMP2	0.0267	0.879	0.785	0.985	0.879 (0.785-0.985)
FOXF1	0.239	0.919	0.798	1.06	0.919 (0.798-1.06)
CLDN18	0.324	0.973	0.923	1.03	0.973 (0.923-1.03)
GIMAP8	0.326	0.938	0.825	1.07	0.938 (0.825-1.07)
VIPR1	0.00799	0.826	0.717	0.951	0.826 (0.717-0.951)
FGD5	0.914	0.992	0.856	1.15	0.992 (0.856-1.15)
PECAM1	0.905	0.993	0.89	1.11	0.993 (0.89-1.11)
ADRB1	0.193	0.913	0.796	1.05	0.913 (0.796-1.05)
HHIP	0.771	0.983	0.874	1.1	0.983 (0.874-1.1)
SPOCK2	0.513	0.971	0.89	1.06	0.971 (0.89-1.06)
CPB2	0.778	0.986	0.897	1.08	0.986 (0.897-1.08)
RETN	0.964	0.998	0.915	1.09	0.998 (0.915-1.09)
CAVIN2	0.313	0.96	0.887	1.04	0.96 (0.887-1.04)
UBE2T	0.0766	1.09	0.991	1.2	1.09 (0.991-1.2)
CCL23	0.702	0.974	0.85	1.12	0.974 (0.85-1.12)
SCN7A	0.0423	0.878	0.775	0.996	0.878 (0.775-0.996)
CLEC14A	0.853	0.99	0.886	1.11	0.99 (0.886-1.11)
PYCR1	0.986	0.999	0.907	1.1	0.999 (0.907-1.1)
CD36	0.706	1.02	0.92	1.13	1.02 (0.92-1.13)
ARHGAP31	0.694	0.975	0.858	1.11	0.975 (0.858-1.11)
PPP1R14B	0.0378	1.16	1.01	1.34	1.16 (1.01-1.34)
TOP2A	0.0707	1.08	0.994	1.17	1.08 (0.994-1.17)
AOC3	0.799	1.01	0.93	1.1	1.01 (0.93-1.1)
GKN2	0.661	0.985	0.921	1.05	0.985 (0.921-1.05)
MMRN2	0.975	1	0.879	1.14	1 (0.879-1.14)
NME1	0.159	1.1	0.962	1.26	1.1 (0.962-1.26)
SLC39A8	0.791	0.989	0.911	1.07	0.989 (0.911-1.07)
UBE2C	0.0189	1.09	1.01	1.18	1.09 (1.01-1.18)
SPN	0.246	0.932	0.827	1.05	0.932 (0.827-1.05)
FGFR4	0.361	1.05	0.942	1.18	1.05 (0.942-1.18)
CCNB1	0.00251	1.17	1.06	1.29	1.17 (1.06-1.29)
CLDN5	0.0861	1.08	0.989	1.19	1.08 (0.989-1.19)
LRRC32	0.24	1.07	0.955	1.2	1.07 (0.955-1.2)
CD93	0.741	1.02	0.921	1.12	1.02 (0.921-1.12)
ESAM	0.81	1.01	0.913	1.12	1.01 (0.913-1.12)
IL1RL1	0.906	0.992	0.874	1.13	0.992 (0.874-1.13)
TNS1	0.281	0.948	0.861	1.04	0.948 (0.861-1.04)
SELP	0.302	0.937	0.828	1.06	0.937 (0.828-1.06)
TPX2	0.00377	1.12	1.04	1.21	1.12 (1.04-1.21)
GIMAP6	0.335	0.946	0.846	1.06	0.946 (0.846-1.06)
VWF	0.977	1	0.915	1.1	1 (0.915-1.1)
SFTPC	0.193	0.981	0.953	1.01	0.981 (0.953-1.01)
MYBL2	0.0194	1.09	1.01	1.17	1.09 (1.01-1.17)
HSD17B6	0.0555	0.921	0.847	1	0.921 (0.847-1)
NUSAP1	0.0562	1.1	0.998	1.21	1.1 (0.998-1.21)
KIF20A	0.0158	1.14	1.03	1.28	1.14 (1.03-1.28)
RRM2	0.0103	1.12	1.03	1.22	1.12 (1.03-1.22)
OSCAR	0.726	0.982	0.885	1.09	0.982 (0.885-1.09)
SLC46A2	0.366	0.948	0.844	1.06	0.948 (0.844-1.06)
CEP55	0.017	1.12	1.02	1.23	1.12 (1.02-1.23)
SCARA5	0.432	0.949	0.833	1.08	0.949 (0.833-1.08)
CACNA2D2	0.0312	0.928	0.867	0.993	0.928 (0.867-0.993)
GPX3	0.903	1	0.934	1.08	1 (0.934-1.08)
CTHRC1	0.0959	1.07	0.989	1.15	1.07 (0.989-1.15)
NEK2	0.00328	1.17	1.05	1.29	1.17 (1.05-1.29)
CCNB2	0.0213	1.11	1.02	1.22	1.11 (1.02-1.22)
AQP4	0.273	0.969	0.917	1.02	0.969 (0.917-1.02)
FGR	0.441	0.958	0.858	1.07	0.958 (0.858-1.07)
LAMP3	0.287	0.961	0.893	1.03	0.961 (0.893-1.03)
OGN	0.0759	0.896	0.793	1.01	0.896 (0.793-1.01)
PEBP4	0.158	0.961	0.91	1.02	0.961 (0.91-1.02)
CHRDL1	0.276	0.955	0.88	1.04	0.955 (0.88-1.04)
HMGA1	0.00304	1.16	1.05	1.28	1.16 (1.05-1.28)
OLR1	0.712	0.986	0.916	1.06	0.986 (0.916-1.06)
MARCO	0.616	1.01	0.96	1.07	1.01 (0.96-1.07)
KIF4A	0.00913	1.15	1.03	1.27	1.15 (1.03-1.27)
MGAT3	0.739	1.02	0.922	1.12	1.02 (0.922-1.12)
DLGAP5	0.0147	1.13	1.03	1.25	1.13 (1.03-1.25)
MSR1	0.858	1.01	0.923	1.1	1.01 (0.923-1.1)
AURKA	0.00702	1.16	1.04	1.29	1.16 (1.04-1.29)
LPL	0.374	0.97	0.907	1.04	0.97 (0.907-1.04)
CCNA2	0.00725	1.14	1.03	1.25	1.14 (1.03-1.25)
MRC1	0.71	0.987	0.922	1.06	0.987 (0.922-1.06)
RECQL4	0.338	1.05	0.951	1.16	1.05 (0.951-1.16)
AGTR2	0.453	1.04	0.944	1.14	1.04 (0.944-1.14)
KPNA2	0.00566	1.16	1.04	1.28	1.16 (1.04-1.28)
AURKB	0.0976	1.08	0.987	1.17	1.08 (0.987-1.17)
HYAL1	0.495	1.03	0.941	1.14	1.03 (0.941-1.14)
CDC6	0.049	1.1	1	1.22	1.1 (1-1.22)
PID1	0.249	0.94	0.847	1.04	0.94 (0.847-1.04)
PDK4	0.756	1.01	0.94	1.09	1.01 (0.94-1.09)
TGFBR2	0.755	0.986	0.899	1.08	0.986 (0.899-1.08)
C5AR1	0.27	1.06	0.957	1.17	1.06 (0.957-1.17)
CYP4B1	0.0115	0.939	0.894	0.986	0.939 (0.894-0.986)
BUB1B	0.0636	1.1	0.995	1.22	1.1 (0.995-1.22)
LRRK2	0.522	0.976	0.906	1.05	0.976 (0.906-1.05)
CDT1	0.0125	1.14	1.03	1.26	1.14 (1.03-1.26)
PRC1	0.0183	1.12	1.02	1.23	1.12 (1.02-1.23)
FOXM1	0.0056	1.12	1.03	1.21	1.12 (1.03-1.21)
DOK2	0.519	0.967	0.872	1.07	0.967 (0.872-1.07)
CD52	0.0827	0.935	0.867	1.01	0.935 (0.867-1.01)
VSIG4	0.526	1.02	0.953	1.1	1.02 (0.953-1.1)
MT1M	0.27	1.05	0.96	1.16	1.05 (0.96-1.16)
NCAPH	0.0399	1.11	1	1.22	1.11 (1-1.22)
PPBP	0.166	1.07	0.973	1.17	1.07 (0.973-1.17)
KLF2	0.666	0.98	0.895	1.07	0.98 (0.895-1.07)
SUSD2	0.0716	0.951	0.901	1	0.951 (0.901-1)
A2M	0.803	0.991	0.923	1.06	0.991 (0.923-1.06)
GAPDH	0.00398	1.16	1.05	1.28	1.16 (1.05-1.28)
CAV2	0.0564	1.1	0.997	1.21	1.1 (0.997-1.21)
CDK1	0.022	1.11	1.02	1.22	1.11 (1.02-1.22)
MYRF	0.0197	1.13	1.02	1.24	1.13 (1.02-1.24)
SPP1	0.033	1.05	1	1.11	1.05 (1-1.11)
PSAT1	0.77	1.01	0.945	1.08	1.01 (0.945-1.08)
PRG4	0.0941	0.901	0.797	1.02	0.901 (0.797-1.02)
CENPA	0.0966	1.09	0.985	1.2	1.09 (0.985-1.2)
SLC2A1	0.00187	1.09	1.03	1.15	1.09 (1.03-1.15)
COLEC12	0.787	0.987	0.9	1.08	0.987 (0.9-1.08)
HMGB3	0.0832	0.93	0.857	1.01	0.93 (0.857-1.01)
CDCA7	0.806	0.989	0.902	1.08	0.989 (0.902-1.08)
ALOX5AP	0.716	0.985	0.911	1.07	0.985 (0.911-1.07)
ZNF385B	0.581	0.974	0.887	1.07	0.974 (0.887-1.07)
NECTIN4	0.471	0.966	0.881	1.06	0.966 (0.881-1.06)
ACKR1	0.321	0.962	0.892	1.04	0.962 (0.892-1.04)
ALOX5	0.732	1.02	0.931	1.11	1.02 (0.931-1.11)
DUOX1	0.0843	0.926	0.849	1.01	0.926 (0.849-1.01)
ANXA3	0.549	1.03	0.937	1.13	1.03 (0.937-1.13)
GPT2	0.304	0.95	0.862	1.05	0.95 (0.862-1.05)
CDKN3	0.0414	1.1	1	1.22	1.1 (1-1.22)
LTBP4	0.915	1.01	0.909	1.11	1.01 (0.909-1.11)
CSF3	0.331	1.05	0.954	1.15	1.05 (0.954-1.15)
FOSB	0.831	1.01	0.949	1.07	1.01 (0.949-1.07)
PBK	0.0463	1.09	1	1.2	1.09 (1-1.2)
FERMT1	0.004	1.13	1.04	1.22	1.13 (1.04-1.22)
ETV4	0.191	0.949	0.876	1.03	0.949 (0.876-1.03)
LAD1	0.013	1.13	1.03	1.25	1.13 (1.03-1.25)
ATOH8	0.421	0.967	0.891	1.05	0.967 (0.891-1.05)
MMP11	0.672	1.01	0.956	1.07	1.01 (0.956-1.07)
CRABP2	0.856	1	0.957	1.05	1 (0.957-1.05)
IL33	0.0347	0.917	0.846	0.994	0.917 (0.846-0.994)
NDNF	0.174	0.961	0.909	1.02	0.961 (0.909-1.02)
AQP1	0.935	0.998	0.941	1.06	0.998 (0.941-1.06)
HSPB8	0.956	1	0.919	1.09	1 (0.919-1.09)
SLC7A5	0.00076	1.13	1.05	1.22	1.13 (1.05-1.22)
ALG1L	0.716	0.987	0.92	1.06	0.987 (0.92-1.06)
SEMA3B	0.289	1.05	0.962	1.14	1.05 (0.962-1.14)
HBEGF	0.118	1.07	0.983	1.17	1.07 (0.983-1.17)
LARGE2	0.0431	0.916	0.841	0.997	0.916 (0.841-0.997)
CHI3L2	0.633	0.98	0.903	1.06	0.98 (0.903-1.06)
C7	0.528	0.981	0.924	1.04	0.981 (0.924-1.04)
DUSP1	0.325	1.04	0.963	1.12	1.04 (0.963-1.12)
SFTPD	0.281	0.979	0.943	1.02	0.979 (0.943-1.02)
DSP	0.148	1.05	0.983	1.12	1.05 (0.983-1.12)
IL7R	0.475	0.969	0.89	1.06	0.969 (0.89-1.06)
COL10A1	0.832	1.01	0.944	1.07	1.01 (0.944-1.07)
SFTPA1	0.885	0.998	0.971	1.03	0.998 (0.971-1.03)
CXCL2	0.714	1.01	0.951	1.08	1.01 (0.951-1.08)
MMP12	0.0218	1.06	1.01	1.12	1.06 (1.01-1.12)
PROM2	0.0877	1.07	0.99	1.15	1.07 (0.99-1.15)
GJB2	0.0311	1.05	1	1.1	1.05 (1-1.1)
EDN1	0.146	1.06	0.979	1.15	1.06 (0.979-1.15)
FBP1	0.291	0.967	0.909	1.03	0.967 (0.909-1.03)
NR4A1	0.794	1.01	0.937	1.09	1.01 (0.937-1.09)
NRGN	0.461	0.974	0.909	1.04	0.974 (0.909-1.04)
CDH3	0.0263	1.08	1.01	1.15	1.08 (1.01-1.15)
MMP1	0.0246	1.05	1.01	1.1	1.05 (1.01-1.1)
COL1A1	0.0228	1.07	1.01	1.14	1.07 (1.01-1.14)
B3GNT3	0.0175	1.08	1.01	1.16	1.08 (1.01-1.16)
C1QA	0.456	1.03	0.955	1.11	1.03 (0.955-1.11)
THBS2	0.0644	1.07	0.996	1.14	1.07 (0.996-1.14)
SELENBP1	0.0543	0.949	0.9	1	0.949 (0.9-1)
C1QB	0.295	1.04	0.968	1.11	1.04 (0.968-1.11)
GPRC5A	0.1	1.05	0.99	1.12	1.05 (0.99-1.12)
ALPL	0.938	0.998	0.941	1.06	0.998 (0.941-1.06)
MYH11	0.123	0.945	0.88	1.02	0.945 (0.88-1.02)
COL3A1	0.0234	1.08	1.01	1.15	1.08 (1.01-1.15)
FOS	0.773	0.99	0.922	1.06	0.99 (0.922-1.06)
IGFBP3	0.12	1.05	0.987	1.12	1.05 (0.987-1.12)
PERP	0.119	1.05	0.987	1.12	1.05 (0.987-1.12)
COL11A1	0.0887	1.05	0.992	1.11	1.05 (0.992-1.11)
RRAD	0.483	1.02	0.961	1.09	1.02 (0.961-1.09)
CST1	0.738	1.01	0.961	1.06	1.01 (0.961-1.06)
TNS4	0.000272	1.1	1.04	1.16	1.1 (1.04-1.16)
FOXA2	0.236	0.965	0.909	1.02	0.965 (0.909-1.02)
ALOX15B	0.255	0.966	0.911	1.02	0.966 (0.911-1.02)
SFN	0.0763	1.06	0.994	1.13	1.06 (0.994-1.13)
COL17A1	0.103	1.04	0.993	1.08	1.04 (0.993-1.08)
CXCL13	0.0484	0.946	0.896	1	0.946 (0.896-1)
PRAME	0.395	1.02	0.973	1.07	1.02 (0.973-1.07)
LYZ	0.283	0.971	0.921	1.02	0.971 (0.921-1.02)
GPX2	0.385	1.01	0.983	1.05	1.01 (0.983-1.05)
STEAP4	0.354	0.972	0.914	1.03	0.972 (0.914-1.03)
NXPH4	0.944	0.998	0.945	1.05	0.998 (0.945-1.05)
SLPI	0.99	1	0.953	1.05	1 (0.953-1.05)
KRT15	0.5	0.987	0.949	1.03	0.987 (0.949-1.03)
CXCL14	0.65	0.99	0.95	1.03	0.99 (0.95-1.03)
SFTPB	0.177	0.981	0.954	1.01	0.981 (0.954-1.01)
NQO1	0.546	1.02	0.964	1.07	1.02 (0.964-1.07)
SERPINA1	0.24	1.03	0.98	1.08	1.03 (0.98-1.08)
KRT17	0.117	1.02	0.994	1.05	1.02 (0.994-1.05)
AKR1B10	0.459	1.01	0.982	1.04	1.01 (0.982-1.04)
MMP13	0.74	1.01	0.962	1.06	1.01 (0.962-1.06)
SOX2	0.0351	0.958	0.92	0.997	0.958 (0.92-0.997)
PKP1	0.847	1	0.972	1.04	1 (0.972-1.04)
DSG3	0.541	1.01	0.978	1.04	1.01 (0.978-1.04)
MMP10	0.0997	1.03	0.994	1.07	1.03 (0.994-1.07)
TP63	0.692	0.993	0.957	1.03	0.993 (0.957-1.03)
DSC3	0.966	1	0.965	1.04	1 (0.965-1.04)
SPRR2D	0.755	1.01	0.971	1.04	1.01 (0.971-1.04)
SPRR3	0.728	0.994	0.962	1.03	0.994 (0.962-1.03)
CLCA2	0.75	0.994	0.961	1.03	0.994 (0.961-1.03)
PI3	0.341	1.01	0.985	1.04	1.01 (0.985-1.04)
